# Supplementary material for: Theoretical mechanistic study of metallaphotoredox catalysis: C–N cross-coupling via Ni(ii)-mediated σ-bond metathesis
Source: Royal Society of Chemistry journal article supplement (doi:10.1039/d0qo00458h), 2020-01-01
Supplement: d0qo00458h1.pdf [file d0qo00458h1.pdf]

## Electronic Supplementary Information

### Theoretical Mechanistic Study of Metallaphotoredox Catalysis: C–N Cross-Coupling via Ni(II)-Mediated $\sigma$ -Bond Metathesis

Run-Han Li,<sup>a</sup> Bo Zhu,<sup>a</sup> Shuang Wang,<sup>a</sup> Yun Geng,<sup>a</sup> Li-Kai Yan,<sup>a</sup> Zhong-Min Su,<sup>a</sup> Li-Shuang Yao,<sup>b</sup> Rong-Lin Zhong<sup>\*c</sup> and Wei Guan<sup>\*ab</sup>

<sup>a</sup>Faculty of Chemistry, National & Local United Engineering Lab for Power Battery, Key Laboratory of Polyoxometalate Science of Ministry of Education, Northeast Normal University, Changchun 130024, People's Republic of China

<sup>b</sup>State Key Laboratory of Applied Optics, Changchun Institute of Optics, Fine Mechanics and Physics, Chinese Academy of Sciences, Changchun 130033, People's Republic of China

<sup>c</sup>Institute of Theoretical Chemistry, Jilin University, Changchun 130023, People's Republic of China

E-mail: [guanw580@nenu.edu.cn](mailto:guanw580@nenu.edu.cn)

#### Table of contents

|                                                                                |     |
|--------------------------------------------------------------------------------|-----|
| 1. Computational Models and Details.....                                       | S1  |
| 1.1. Computational Methods .....                                               | S1  |
| 1.1.1. Photophysical Properties of Ir(III) .....                               | S1  |
| 1.1.2. Redox Potential .....                                                   | S3  |
| 1.1.3. Correction of Translational Entropy in Solution.....                    | S4  |
| 1.2. Model Reaction.....                                                       | S5  |
| 2. Marcus Theory using in Single Electron Transfer Step.....                   | S5  |
| 2.1. Recombination Energy and Activation Energy .....                          | S5  |
| 2.2. Electron Transfer Rate and Electron Coupling Constants.....               | S6  |
| 3. References .....                                                            | S6  |
| 4. Oxidation State Modulation Mechanism Initiated by Reductive Quenching ..... | S7  |
| 5. Oxidation State Modulation Mechanism Initiated by Oxidative Quenching.....  | S8  |
| 6. Radical Mechanism Initiated by Reductive Quenching.....                     | S9  |
| 7. Quenching Mechanism of Photoexcited *Ir(III).....                           | S10 |
| 8. Tolerance of $\sigma$ -Bond Metathesis.....                                 | S11 |
| 8.1. Buried Volume Calculations .....                                          | S12 |
| 8.2. Strain Distortion/Interaction Model.....                                  | S13 |
| 9. Cartesian Coordinates of Optimized Structures .....                         | S13 |

# 1. Computational Models and Details

## 1.1. Computational Methods

### 1.1.1. Photophysical Properties of Ir(III)

The ground-state geometry optimization of Ir<sup>III</sup>[dF(CF<sub>3</sub>)ppy]<sub>2</sub>(dtbbpy)PF<sub>6</sub> (**Ir(III)**) was carried out by using (U)M06 functional with LanL2DZ basis set for iridium atom and 6-31G(d) basis sets for the other atoms in the gas phase. The TD-DFT calculation was performed at the (U)M06/[6-31G(d)/LanL2DZ(Ir)] level in acetonitrile based on the optimized ground-state geometry, where solvent effects of acetonitrile were evaluated with SMD model. The absorption spectra were simulated with the full width at half maximum (FWHM) of 1200 cm<sup>-1</sup> based on the TD-DFT computational results. As illustrated in Figure S1, the calculated absorption bands of **Ir(III)** at 253, 300 and 395 nm agree well with the experimental values 260, 310 and 380 nm, respectively.<sup>S1</sup> In addition, we have analyzed the transition properties of **Ir(III)**. As shown in Figure S2 and Table S1, the strong absorption bands at 253, 300, 342, and 395 nm are mainly assigned both ligand-to-ligand charge transfer (LLCT) and metal-to-ligand charge transfer MLCT characters.

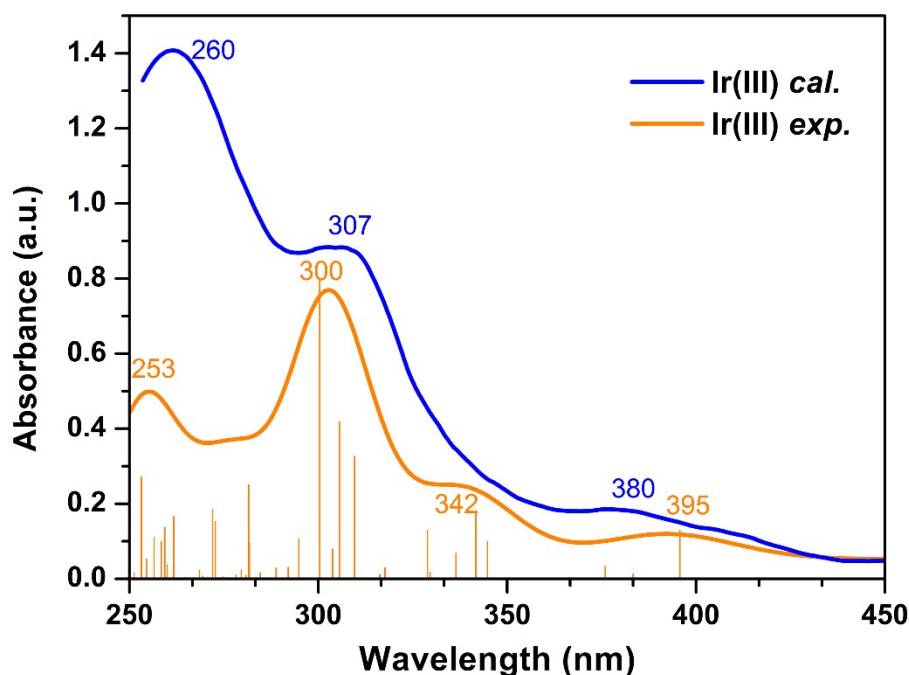

**Figure S1.** Comparisons of experimental and calculated absorption spectra of **Ir(III)**.

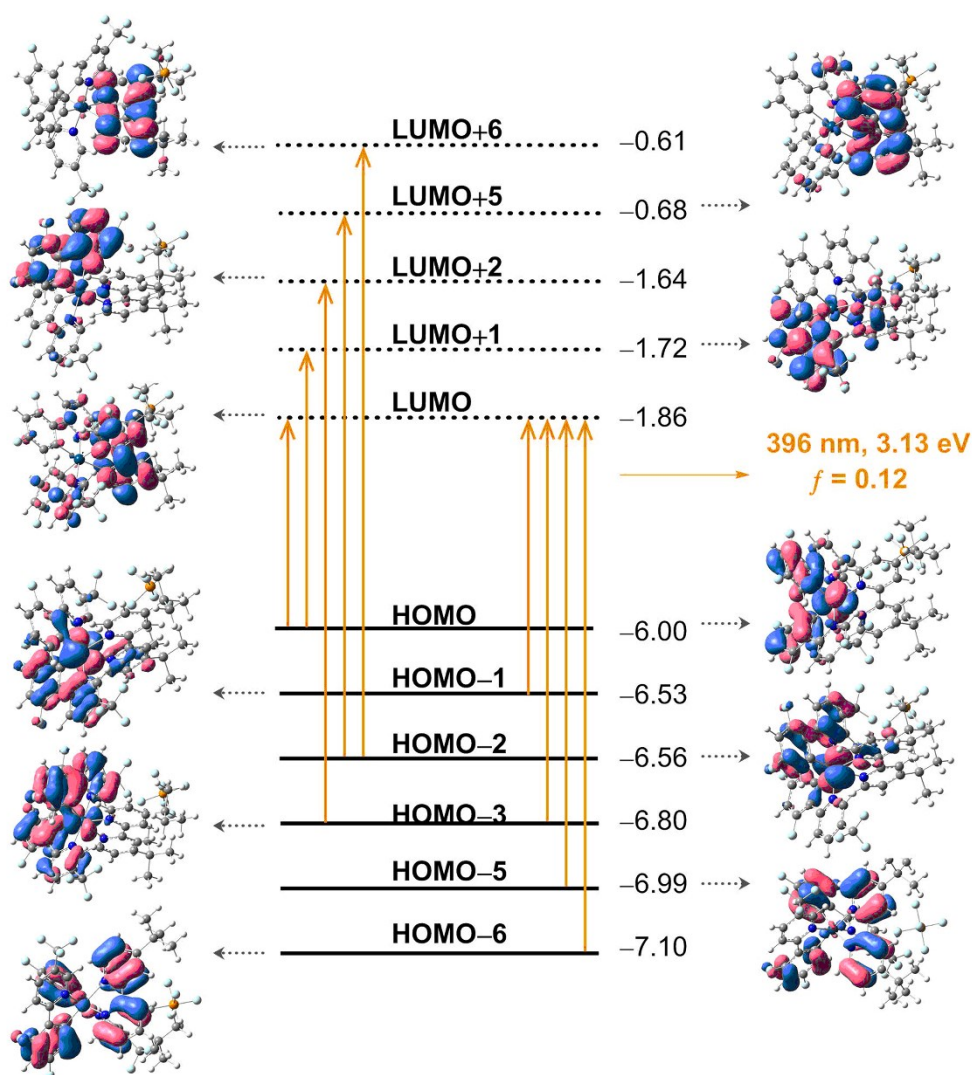

**Figure S2.** The calculated frontier molecular orbital distributions of Ir(III).

**Table S1.** Absorption peaks  $\lambda_{\text{abs}}$  [in eV (nm)], the oscillator strengths ( $f$ ), major contributions and assignments (H and L represent HOMO and LUMO, respectively).

| $\lambda_{\text{abs}}$ | $f$  | Major Contributions                   | Assignments |
|------------------------|------|---------------------------------------|-------------|
| 395                    | 0.12 | H→L (63%), H→L+1 (31%)                | MLCT/LLCT   |
| 342                    | 0.16 | H-3→L (10%), H→L (58%), H-1→L (21%)   | MLCT/LLCT   |
| 300                    | 0.75 | H-6→L (30%), H-5→L (34%) H-3→L+2 (8%) | MLCT/LLCT   |
| 253                    | 0.25 | H-2→L+5 (11%), H-2→L+6 (58%)          | MLCT/LLCT   |

### 1.1.2. Redox Potential

We calculated the standard redox potential ( $E_{1/2}^{red}$ ) according to the equation<sup>S2</sup>:

$$E_{1/2}^{red} = -\frac{\Delta G_r}{nF} - E_{SHE}$$

where  $F$  is the Faraday constant and  $n$  the number of electrons transferred,  $E_{SHE} = 4.28$  eV, and  $\Delta G_r$  free energy change of the reaction.

**Table S2.** The experimental and calculated redox potentials of iridium complexes in CH<sub>3</sub>CN solvent.

| <b>Redox Potential</b> | $E_{1/2}^{red}[*\text{Ir}^{\text{III}}/\text{Ir}^{\text{II}}]$ | $E_{1/2}^{red}[\text{Ir}^{\text{III}}/\text{Ir}^{\text{II}}]$ | $E_{1/2}^{red}[\text{Ir}^{\text{IV}}/\text{Ir}^{\text{III}}]$ | $E_{1/2}^{red}[\text{Ir}^{\text{IV}}/*\text{Ir}^{\text{III}}]$ |
|------------------------|----------------------------------------------------------------|---------------------------------------------------------------|---------------------------------------------------------------|----------------------------------------------------------------|
| <b>Exp.</b>            | 1.21                                                           | -1.37                                                         | 1.69                                                          | -0.89                                                          |
| <b>Cal.</b>            | 0.82                                                           | -1.60                                                         | 1.40                                                          | -1.05                                                          |
| <b> Δ </b>             | 0.39                                                           | 0.23                                                          | 0.29                                                          | 0.16                                                           |

**Table S3.** The calculated redox potentials of Ir, Ni complexes and DABCO in DMA solvent.

| <b>Redox Potential</b>                                                                                           | <b>Cal.</b> |
|------------------------------------------------------------------------------------------------------------------|-------------|
| $E_{1/2}[*\text{Ir}^{\text{III}}/\text{Ir}^{\text{II}}]$                                                         | 1.04        |
| $E_{1/2}[\text{Ir}^{\text{III}}/\text{Ir}^{\text{II}}]$                                                          | -1.50       |
| $E_{1/2}[*\text{Ir}^{\text{III}}/\text{Ir}^{\text{IV}}]$                                                         | -1.41       |
| $E_{1/2}[\text{Ir}^{\text{IV}}/\text{Ir}^{\text{III}}]$                                                          | 1.11        |
| $E_{1/2}[\text{Ni}^{\text{III}}/\text{Ni}^{\text{II}}]$ ( $E_{1/2}[\mathbf{a5}/\mathbf{a4}]$ )                   | 0.79        |
| $E_{1/2}[\text{Ni}^{\text{I}}/\text{Ni}^{\text{0}}]$ ( $E_{1/2}[\mathbf{a6}/\text{Ni}(\mathbf{0})^{\text{S}}]$ ) | -1.75       |
| $E_{1/2}[\text{DABCO}^{*+}/\text{DABCO}]$                                                                        | 0.53        |

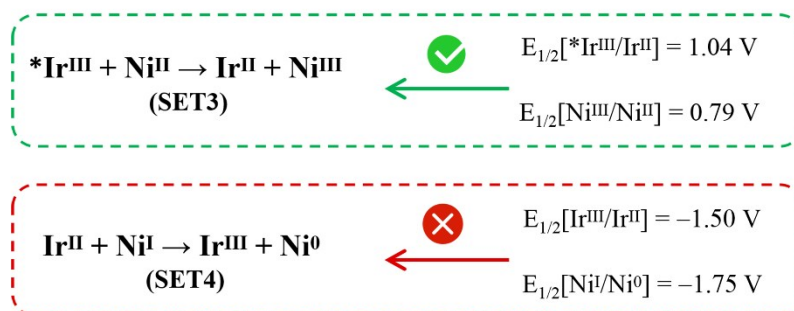

**Scheme S1.** The single electron transfer processes.

### 1.1.3. Correction of Translational Entropy in Solution

We evaluated the electronic energy ( $E_{sol}$ ) with zero-point energy correction in solution. For each species, the  $E_{sol}$  is defined through equation:

$$E_{sol} = E_{sol}^{pot} + E_{gas}^{v_0}$$

where  $E_{sol}^{pot}$  is the potential energy including non-electrostatic energy in solution and  $E_{gas}^{v_0}$  represents the zero-point vibrational energy in the gas phase. In a bimolecular process, such as the coordination of aryl bromide with the nickel center, the entropy change must be taken into consideration because the entropy considerably decreases.

In this case, Gibbs energy ( $G_{sol}^o$ ) is evaluated as follows:

$$\begin{aligned} G_{sol}^o &= H_0 - T(S_r^o + S_v^o + S_t^o) \\ &= E^T + P\Delta V - T(S_r^o + S_v^o + S_t^o) \\ &= E_{sol} + E_{therm} - T(S_r^o + S_v^o + S_t^o) \end{aligned}$$

where  $\Delta V$  is 0 in solution,  $E_{therm}$  is the thermal correction by translational, vibrational, and rotational movement, and  $S_r^o$ ,  $S_v^o$ , and  $S_t^o$  are rotational, vibrational, and translational entropies, respectively. In general, the Sackur-Tetrode equation is used to evaluate translational entropy  $S_t^o$ . In solution, however, the usual Sackur-Tetrode equation cannot be directly applied to the evaluation of  $S_t^o$ , because the translation movement is suppressed very much in solution. In this context, the translational entropy was corrected with the method developed by Whitesides et al.,<sup>19</sup> where the rotational entropy was evaluated in a normal manner. Thermal correction and entropy contributions of vibration movements to the Gibbs energy were evaluated with the frequencies calculated at 298.15 K and 1 atm.

## 1.2. Model Reaction

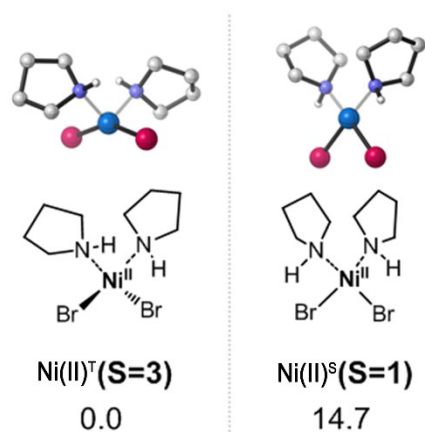

**Figure S3.** Structures of triplet and singlet Ni(II) complexes. The Gibbs free energies relative to the most stable  $\text{Ni(II)}^{\text{T}}$  conformation are given in kcal/mol. Gray, white, purple, pink and blue spheres represent C, H, N, Br and Ni atoms, respectively.

## 2. Marcus Theory using in Single Electron Transfer Step

### 2.1. Recombination Energy and Activation Energy<sup>S3,S4</sup>

According to the Marcus equation, the reorganization energy  $\lambda$  is normally decomposed into internal energy ( $\lambda_i$ ) and external energy ( $\lambda_o$ ). The internal reorganization energy  $\lambda_i$  can be estimated according to the equation:

$$\begin{aligned}\lambda_{i1} &= [E^{D^*}(Q_P) + E^A(Q_P)] - [E^{D^*}(Q_R) + E^A(Q_R)] \\ \lambda_{i2} &= [E^{D^+}(Q_R) + E^{A^-}(Q_R)] - [E^{D^+}(Q_P) + E^{A^-}(Q_P)] \\ \lambda_i &= (\lambda_{i1} + \lambda_{i2})/2\end{aligned}$$

where  $\lambda_{i1}$  represents the difference between the energy of the reactants (R) in the geometry characteristic of the products and that in their equilibrium geometry,  $\lambda_{i2}$  is the difference between the energy of the products (P) in the characteristic of the reactants and that in their equilibrium geometry.  $Q_R$  and  $Q_P$  are the equilibrium geometries of the reactants and products, respectively.

In addition, the external reorganization energy  $\lambda_o$  was calculated from equation:

$$\lambda_o = (332 \text{ kcal/mol}) \left( \frac{1}{2a_1} + \frac{1}{2a_2} - \frac{1}{R} \right) \left( \frac{1}{\epsilon_{op}} - \frac{1}{\epsilon} \right)$$

$$\lambda = \lambda_o + \lambda_i$$

$$\Delta G^{\circ\ddagger} = \frac{(\Delta G + \lambda)^2}{4\lambda}$$

where  $a_1$  is the radii of the oxidant,  $a_2$  is the radii of the reductant,  $R = a_1 + a_2$ ,  $\epsilon_{op}$  is the optical dielectric constant ( $\epsilon_{op} = 2.25$ ),  $\epsilon$  is the static dielectric constant for the DMA solvent ( $\epsilon = 35.7$ ), and  $\Delta G$  is the free energy change of the reaction.

## 2.2. Electron Transfer Rate and Electron Coupling Constants<sup>S3,S5,S6</sup>

In the Marcus theory, the electron transfer rate constant is expressed as:

$$k = \frac{4\pi^3}{h^2 \lambda k_B T} |V_{DA}|^2 \exp\left(-\frac{(\Delta G + \lambda)^2}{4\lambda k_B T}\right)$$

where  $\lambda$  is the reorganization energy,  $V_{DA}$  is the electronic coupling (charge-transfer integral) between donor and acceptor,  $\Delta G$  is the free energy change for the electron transfer reaction,  $k_B$  is the Boltzmann constant,  $h$  is Planck's constant, and  $T$  is the temperature ( $T = 298.15$  K in our calculations).

The electronic coupling matrix (charge transfer integral) can be calculated with the Generalized Mulliken-Hush (GMH) model:

$$V_{DA} = \frac{\mu_{12} \Delta E_{12}}{\sqrt{(\mu_1 - \mu_2)^2 + 4(\mu_{12})^2}}$$

where  $\mu_{12}$  is the transition dipole moment,  $\Delta E_{12}$  is the energy difference, and  $\mu_1$  and  $\mu_2$  are the permanent dipoles, all of which are calculated between the two eigenstates of the system.

## 3. References

- S1 M. S. Lowry, J. I. Goldsmith, J. D. Slinker, R. Rohl, R. A. Pascal, G. G. Malliaras and S. Bernhard, Single-Layer Electroluminescent Devices and Photoinduced Hydrogen Production from an Ionic Iridium(III) Complex, *Chem. Mater.*, 2005, **17**, 5712.
- S2 A. V. Marenich, J. Ho, M. L. Coote, C. J. Cramer and D. G. Truhlar, Computational electrochemistry: prediction of liquid-phase reduction potentials, *Phys. Chem. Chem. Phys.*, 2014, **16**, 15068.
- S3 R. A. Marcus, Electron Transfer Reactions in Chemistry: Theory and Experiment (Nobel Lecture), *Angew. Chem. Int. Ed.*, 1993, **32**, 1111.
- S4 V. Lemaur, M. Steel, D. Beljonne, J. Bredas and J. Cornil, Photoinduced charge generation and recombination dynamics in model donor/acceptor pairs for organic solar cell applications: A full quantum-chemical treatment, *J. Am. Chem. Soc.*, 2004, **127**, p. 6077.
- S5 P. F. Barbara, T. J. Meyer and M. A. Ratner, Contemporary issues in electron transfer research, *J. Phys. Chem.*, 1996, **100**, 13148.
- S6 A. Voityuk, Estimation of electronic coupling in pi-stacked donor-bridge-acceptor systems: Correction of the two-state model, *J. Chem. Phys.*, 2006, **124**, 64505.

## 4. Oxidation State Modulation Mechanism Initiated by Reductive Quenching

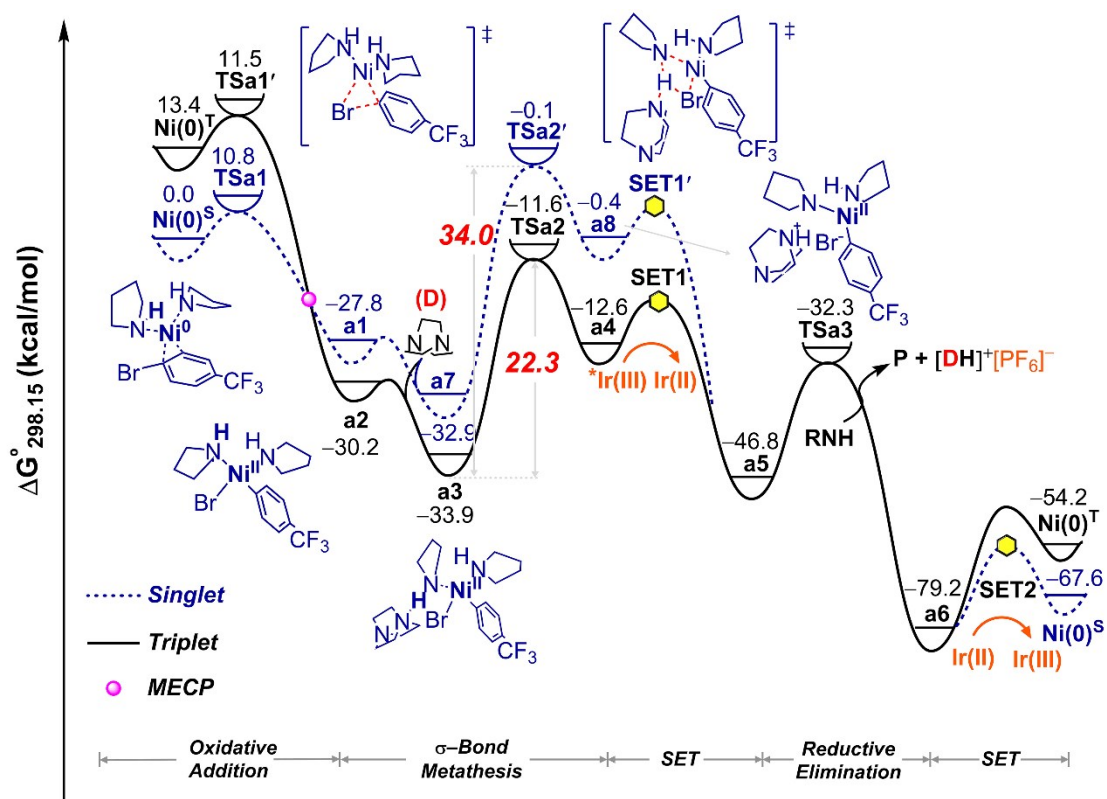

**Figure S4.** Singlet and triplet Gibbs energy profiles ( $\Delta G^\circ_{298.15}$ ) of the oxidation state modulation mechanism merging Ir<sup>III</sup>–\*Ir<sup>III</sup>–Ir<sup>II</sup>–Ir<sup>III</sup> reductive quenching and Ni<sup>0</sup>–Ni<sup>II</sup>–Ni<sup>III</sup>–Ni<sup>I</sup>–Ni<sup>0</sup> catalytic cycles.



## 5. Oxidation State Modulation Mechanism Initiated by Oxidative Quenching

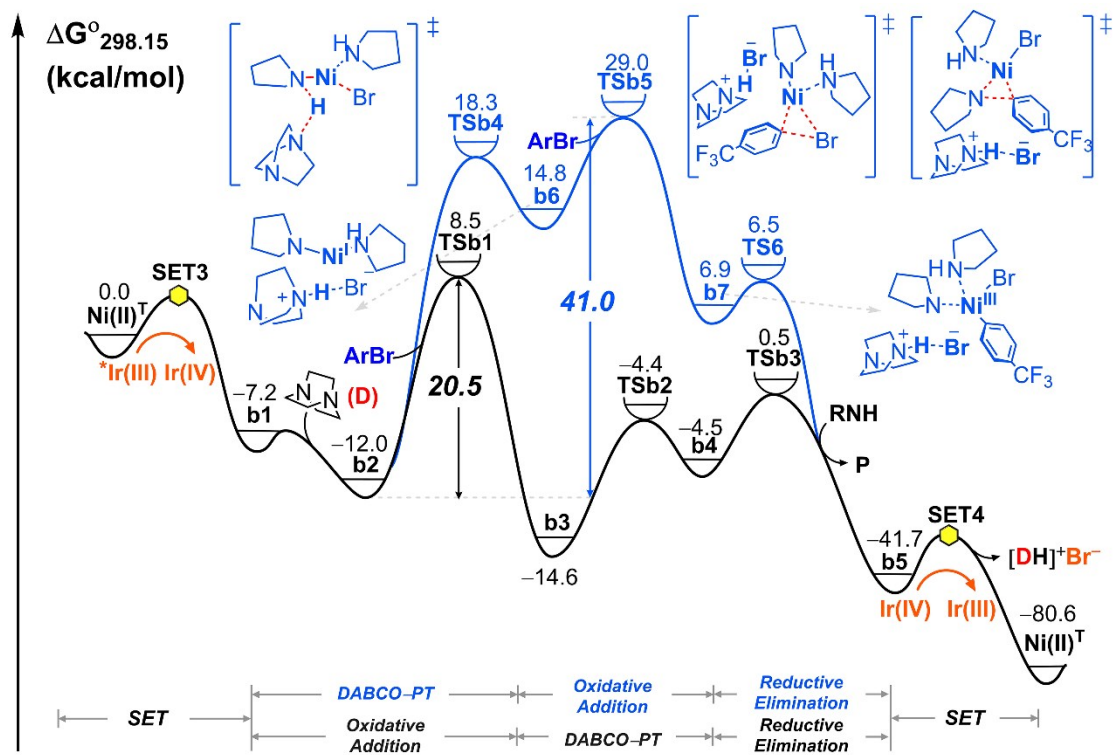

**Figure S5.** Gibbs energy profiles ( $\Delta G^\circ_{298.15}$ ) of the oxidation state modulation mechanism merging Ir<sup>III</sup>-\*Ir<sup>III</sup>-Ir<sup>IV</sup>-Ir<sup>III</sup> oxidative quenching and Ni<sup>II</sup>-Ni<sup>I</sup>-Ni<sup>III</sup>-Ni<sup>I</sup>-Ni<sup>II</sup> catalytic cycles.

## 6. Radical Mechanism Initiated by Reductive Quenching

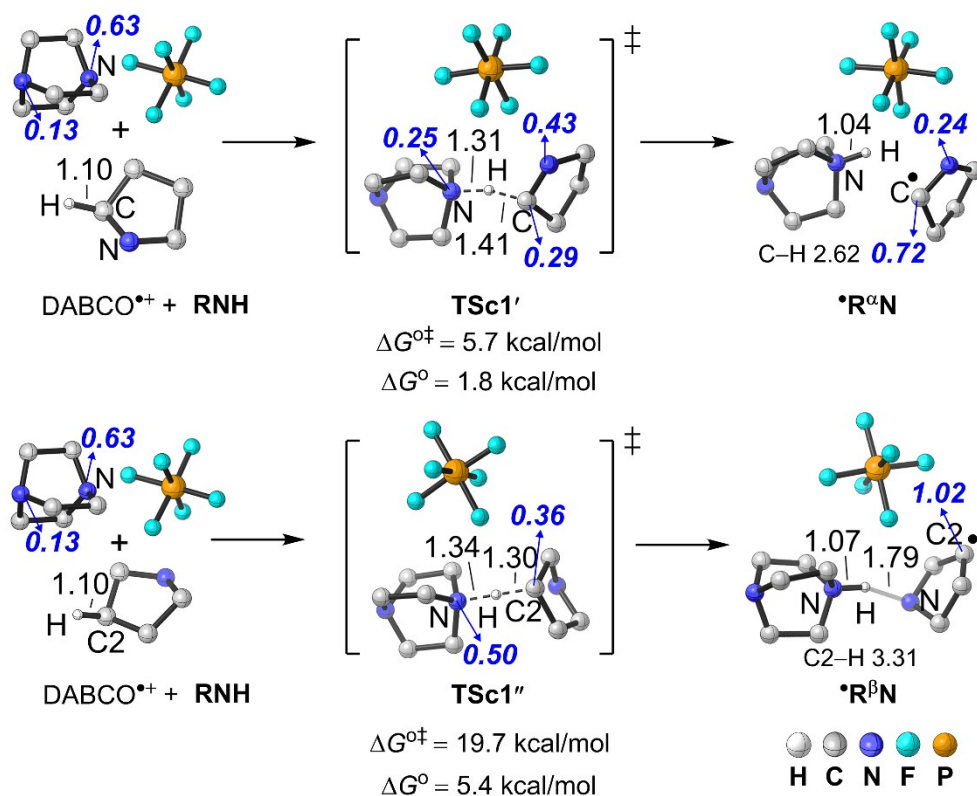

**Figure S6.**  $\Delta G^{\ddagger}$ ,  $\Delta G^{\circ}$ , and optimized structures of  $\alpha$ - and  $\beta$ -carbon-centered hydrogen atom transfer processes (selected bond distances are given in angstroms with black non-italic font and spin densities are given in blue italic font).

## 7. Quenching Mechanism of Photoexcited \*Ir(III)

### i) Ir(III)/Ni(II) clusters

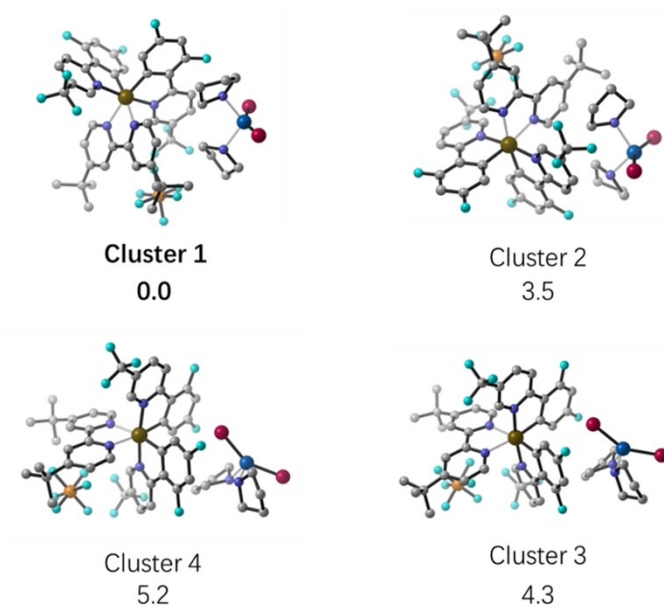

### ii) Ir(III)/DABCO clusters

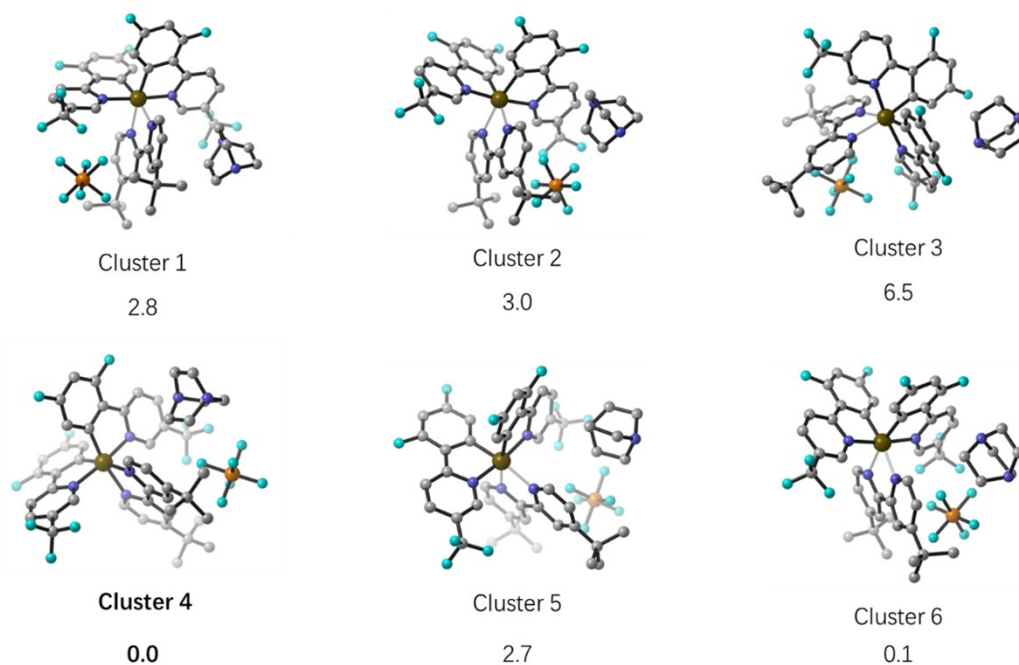

**Figure S7.** Structure and relative energy of optimized conformers at the (U)M06/[6-31G(d)/LanL2DZ(Ni,Ir)] level. Gray, purple, green, orange, pink, blue, brown spheres represent C, N, F, P, Br, Ni, Ir atoms, respectively. H atoms are omitted for clarity. Electron energies are given in kcal/mol.

## 8. Tolerance of $\sigma$ -Bond Metathesis

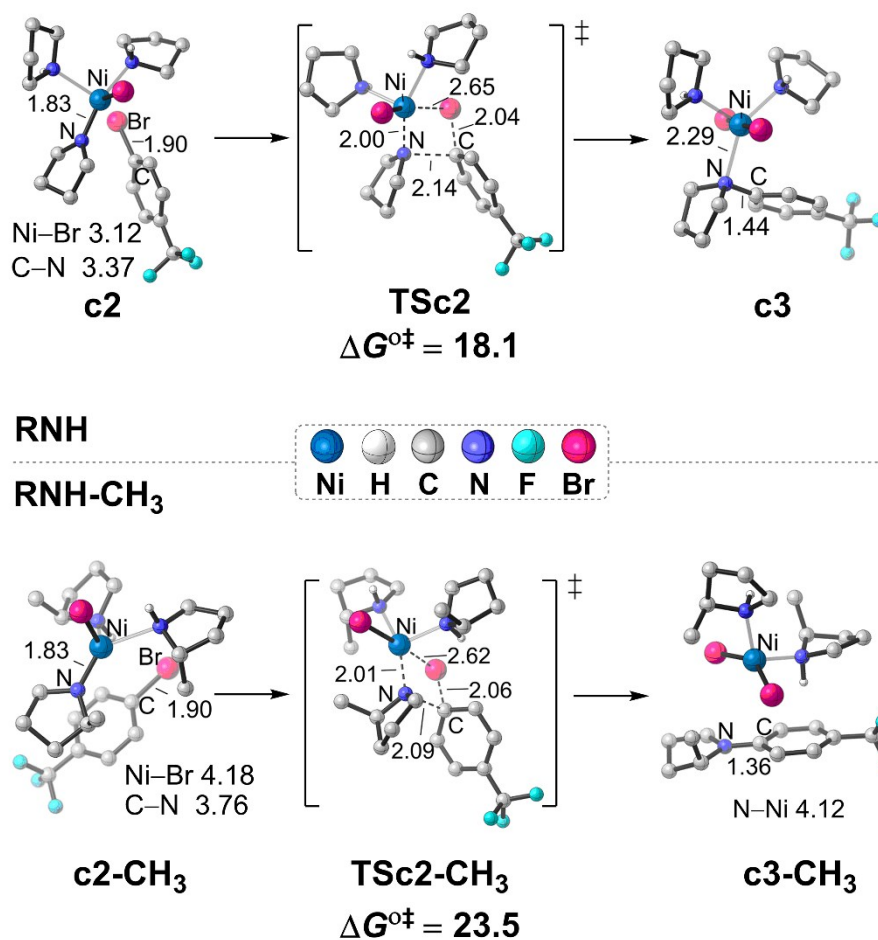

**Figure S8.** Comparisons of  $\sigma$ -bond metathesis involving pyrrolidine (**RNH**) and 2-methylpyrrolidine (**RNH-CH<sub>3</sub>**). Gibbs activation energies and selected bond lengths are given in kcal/mol and angstroms, respectively.

### 8.1. Buried Volume Calculations

The complexes of **c2** and **c2-CH<sub>3</sub>** were used as models to comparison the percentage buried volume, %V<sub>Bur</sub>, for the ligand backbones of the pyrrolidine and 2-methylpyrrolidine. The radius (R) of the sphere around the metal center was set to 3.5 Å and a mesh of 0.1 Å was used to scan the sphere. ArBr groups and Br atom remaining on the Ni of **c2** and **c2-CH<sub>3</sub>** were removed in order to analyze the influence of the ancillary ligand only. We selected different z-axis directions to conduct steric maps scanning on these two compounds (Figures 6 and S9). %V<sub>Bur</sub> of **c2** and **c2-CH<sub>3</sub>** are 68.7% and 74.5%.

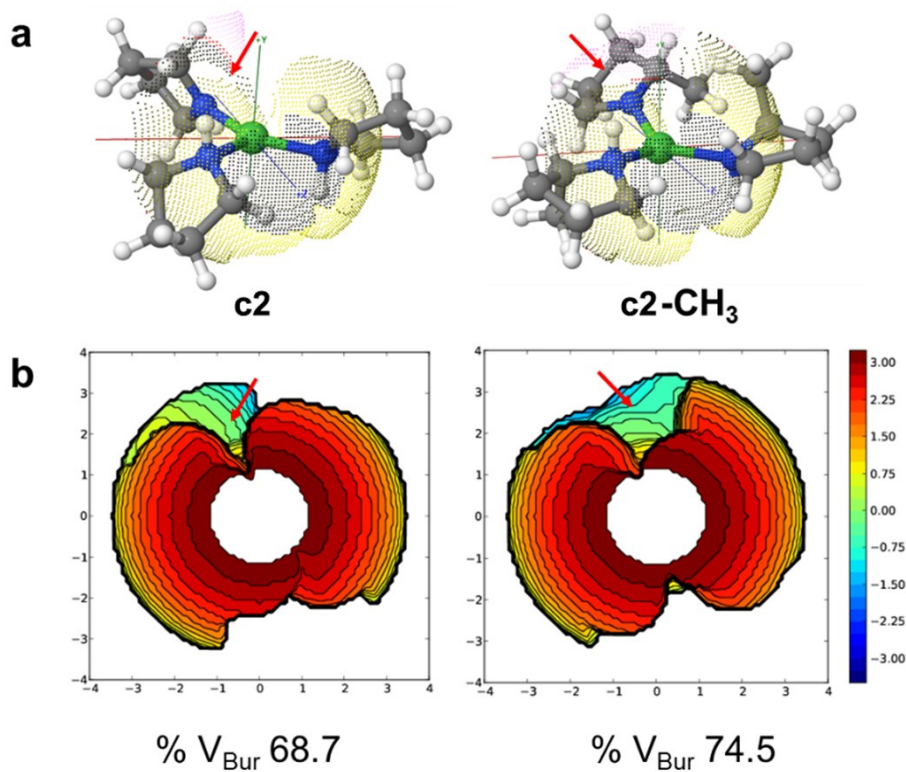

**Figure S9.** a) Ball-and-stick representations of complexes **c2** and **c2-CH<sub>3</sub>**. b) Steric crowding maps along the ligand direction with nickel as the center and buried volume calculations for **c2** and **c2-CH<sub>3</sub>**. The red arrow is the attacking direction of ArBr.

## 8.2. Strain Distortion/Interaction Model

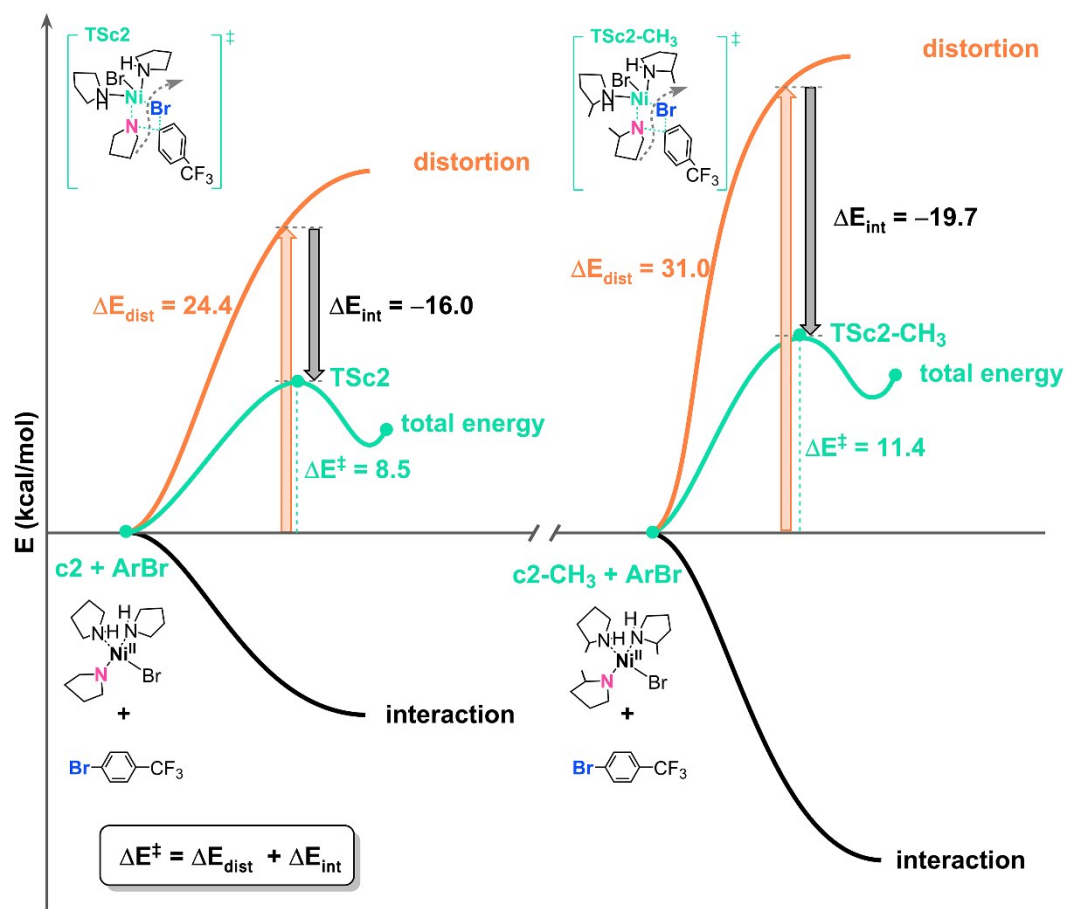

**Figure S10.** Strain distortion/interaction analysis of  $\sigma$ -bond metathesis with different substrates. Energies are given in kcal/mol.

## 9. Cartesian Coordinates of Optimized Structures

### RNH

|   |            |            |            |
|---|------------|------------|------------|
| N | -0.0003289 | -1.2469337 | -0.4274706 |
| H | -0.0006219 | -2.2314617 | -0.1808586 |
| C | 1.1514561  | -0.5294727 | 0.1056184  |
| H | 2.0740411  | -0.8264057 | -0.4062846 |
| H | 1.2917591  | -0.7098727 | 1.1906094  |
| C | 0.7731001  | 0.9353703  | -0.1286316 |
| H | 1.1561971  | 1.2762373  | -1.0966616 |
| H | 1.1972441  | 1.5910763  | 0.6393284  |
| C | -0.7725189 | 0.9358533  | -0.1284576 |
| H | -1.1556419 | 1.2773063  | -1.0962696 |
| H | -1.1960529 | 1.5915783  | 0.6398234  |
| C | -1.1517789 | -0.5288287 | 0.1054854  |

|   |            |            |            |
|---|------------|------------|------------|
| H | -2.0744399 | -0.8251347 | -0.4066466 |
| H | -1.2924149 | -0.7093117 | 1.1904154  |

**ArBr**

|    |            |            |            |
|----|------------|------------|------------|
| C  | -0.7363617 | 0.0271676  | -0.0000252 |
| C  | -0.0546627 | -1.1882864 | -0.0000082 |
| C  | 1.3314833  | -1.2085374 | 0.0000038  |
| C  | 2.0228493  | -0.0010564 | 0.0000028  |
| C  | 1.3553563  | 1.2161416  | -0.0000012 |
| C  | -0.0349457 | 1.2264786  | -0.0000122 |
| H  | -0.6161907 | -2.1212544 | -0.0000092 |
| H  | 1.8781493  | -2.1483324 | 0.0000168  |
| H  | 1.9190513  | 2.1458746  | 0.0000008  |
| H  | -0.5727367 | 2.1711276  | -0.0000072 |
| C  | -2.2330147 | -0.0060134 | -0.0000012 |
| F  | -2.7019427 | -0.6548144 | 1.0739168  |
| F  | -2.7019827 | -0.6550234 | -1.0737782 |
| F  | -2.7697357 | 1.2166696  | -0.0001012 |
| Br | 3.9146833  | -0.0201414 | 0.0000028  |

**aniline product (P)**

|   |            |            |            |
|---|------------|------------|------------|
| N | 1.2198537  | 0.0008220  | 0.0028014  |
| C | 2.0358317  | -1.2017590 | 0.0288344  |
| H | 1.9968737  | -1.7329650 | -0.9396196 |
| H | 1.6815627  | -1.9012210 | 0.8006584  |
| C | 3.4339627  | -0.6711600 | 0.3217624  |
| H | 4.2241537  | -1.3291070 | -0.0561136 |
| H | 3.5717217  | -0.5692610 | 1.4075024  |
| C | 3.4210597  | 0.7060340  | -0.3332936 |
| H | 3.5517737  | 0.6059640  | -1.4200666 |
| H | 4.2042037  | 1.3758570  | 0.0383354  |
| C | 2.0173857  | 1.2158050  | -0.0296306 |
| H | 1.6472717  | 1.9097920  | -0.7988926 |
| H | 1.9783537  | 1.7465310  | 0.9390344  |
| C | -0.1485583 | -0.0111320 | 0.0034844  |
| C | -0.8836343 | 1.1888070  | 0.1039744  |
| C | -0.8641143 | -1.2198620 | -0.0946016 |
| C | -2.2650733 | 1.1677780  | 0.1040564  |
| H | -0.3634423 | 2.1393590  | 0.1969264  |
| C | -2.2491933 | -1.2247920 | -0.0916626 |
| H | -0.3295363 | -2.1624220 | -0.1867976 |
| C | -2.9632693 | -0.0356210 | 0.0079094  |

|   |            |            |            |
|---|------------|------------|------------|
| H | -2.8191043 | 2.1024110  | 0.1869994  |
| H | -2.7831713 | -2.1690920 | -0.1708646 |
| C | -4.4517833 | -0.0012600 | -0.0024006 |
| F | -4.9929233 | -1.2253350 | -0.0165296 |
| F | -4.9416503 | 0.6401450  | 1.0716244  |
| F | -4.9285553 | 0.6556830  | -1.0734296 |

**DABCO**

|   |            |            |            |
|---|------------|------------|------------|
| C | 0.7754671  | -1.3740704 | -0.0193040 |
| C | -0.7754259 | -1.3741034 | -0.0185240 |
| H | 1.1817520  | -1.8722674 | -0.9116980 |
| H | 1.1826610  | -1.8973774 | 0.8581820  |
| H | -1.1826080 | -1.8731204 | -0.9100500 |
| H | -1.1816930 | -1.8966394 | 0.8598520  |
| C | 0.7753311  | 0.7037046  | -1.1802981 |
| H | 1.1816630  | 1.7256396  | -1.1655590 |
| H | 1.1823640  | 0.2054696  | -2.0723261 |
| C | -0.7755309 | 0.7031036  | -1.1805260 |
| H | -1.1826850 | 1.7247246  | -1.1668431 |
| H | -1.1818880 | 0.2037276  | -2.0722241 |
| C | -0.7753649 | 0.6709236  | 1.1992190  |
| H | -1.1817110 | 1.6928776  | 1.2125700  |
| H | -1.1824010 | 0.1483486  | 2.0772050  |
| C | 0.7755230  | 0.6703596  | 1.1994320  |
| H | 1.1826360  | 1.6919926  | 1.2138360  |
| H | 1.1819100  | 0.1466736  | 2.0770579  |
| N | -1.2791150 | -0.0000034 | 0.0000940  |
| N | 1.2791150  | 0.0000366  | -0.0000950 |

**DABCO<sup>+</sup>**

|   |            |            |            |
|---|------------|------------|------------|
| C | 1.9368565  | 1.1222850  | -0.7797998 |
| C | 0.3314425  | 1.1298510  | -0.7868738 |
| H | 2.3077255  | 2.0561230  | -0.3429448 |
| H | 2.3093065  | 1.0404910  | -1.8069028 |
| H | -0.0771425 | 2.0363700  | -0.3330698 |
| H | -0.0758305 | 1.0170770  | -1.7948518 |
| C | 1.9381395  | 0.1139210  | 1.3609922  |
| H | 2.3094935  | -0.7314720 | 1.9507972  |
| H | 2.3113005  | 1.0441900  | 1.8034142  |
| C | 0.3325845  | 0.1167200  | 1.3727742  |
| H | -0.0758275 | -0.7293330 | 1.9313432  |
| H | -0.0741145 | 1.0461940  | 1.7792872  |



|   |            |            |            |
|---|------------|------------|------------|
| C | 0.3317645  | -1.2470620 | -0.5845528 |
| H | -0.0743975 | -2.0639950 | 0.0174732  |
| H | -0.0778545 | -1.3075220 | -1.5961098 |
| C | 1.9374175  | -1.2358300 | -0.5826158 |
| H | 2.3108515  | -2.0842650 | 0.0014572  |
| H | 2.3076935  | -1.3239480 | -1.6100178 |
| N | -0.0352445 | -0.0002510 | 0.0007092  |
| N | 2.4040975  | 0.0002310  | -0.0006948 |
| P | -3.2631825 | -0.0000080 | 0.0000672  |
| F | -4.1561675 | 1.0906440  | -0.7654798 |
| F | -2.2826385 | -0.1173420 | -1.3225338 |
| F | -2.2819305 | 1.2041220  | 0.5593842  |
| F | -4.1554725 | 0.1180040  | 1.3276332  |
| F | -4.1564775 | -1.2081880 | -0.5617888 |
| F | -2.2823925 | -1.0870070 | 0.7629042  |

**Ir(III)**

|   |            |            |            |
|---|------------|------------|------------|
| N | -3.2891190 | 0.3071409  | 0.6506368  |
| N | -0.4336470 | -1.9396401 | -1.3143092 |
| C | -2.8800130 | -2.2707641 | 0.4345848  |
| C | -2.6105690 | -3.6334721 | 0.2943898  |
| C | -3.4478280 | -4.5630591 | 0.8887538  |
| C | -4.5647430 | -4.2058301 | 1.6346538  |
| C | -4.8272950 | -2.8590731 | 1.7650248  |
| C | -4.0204140 | -1.8700291 | 1.1872658  |
| C | -4.2427250 | -0.4395861 | 1.2826278  |
| C | -5.3102550 | 0.2090929  | 1.9218878  |
| C | -5.3921910 | 1.5853309  | 1.9024188  |
| C | -4.4048150 | 2.3229899  | 1.2482018  |
| C | -3.3699340 | 1.6449619  | 0.6379838  |
| C | -2.7535850 | -0.9416791 | -2.0494182 |
| C | -3.9956020 | -0.3982891 | -2.3801622 |
| C | -4.4868110 | -0.5438241 | -3.6684232 |
| C | -3.7930060 | -1.2153921 | -4.6639002 |
| C | -2.5687720 | -1.7569421 | -4.3235792 |
| C | -2.0193380 | -1.6461381 | -3.0420412 |
| C | -0.7437060 | -2.2084821 | -2.6174222 |
| C | 0.1302480  | -2.9854071 | -3.3827072 |
| C | 1.2737980  | -3.5116791 | -2.8076992 |
| C | 1.5473040  | -3.2538361 | -1.4704992 |
| C | 0.6744290  | -2.4493921 | -0.7635342 |
| H | -1.7592180 | -3.9973591 | -0.2790862 |

|    |            |            |            |
|----|------------|------------|------------|
| H  | -5.2072320 | -4.9510131 | 2.0924288  |
| H  | -6.0693090 | -0.3802521 | 2.4206378  |
| H  | -6.2202950 | 2.0983689  | 2.3889088  |
| H  | -2.5764510 | 2.1702369  | 0.1113618  |
| H  | -4.6028980 | 0.1425829  | -1.6550532 |
| H  | -4.1911490 | -1.3188361 | -5.6681532 |
| H  | -0.1007170 | -3.1832591 | -4.4216532 |
| H  | 1.9554410  | -4.1235521 | -3.3943292 |
| H  | 0.8735840  | -2.1977951 | 0.2745728  |
| C  | 0.5918470  | 0.4108409  | 1.1498888  |
| C  | 1.7126740  | 0.4318699  | 1.9760768  |
| C  | 1.8042960  | -0.4180981 | 3.0743848  |
| C  | 0.6968280  | -1.2382871 | 3.3295248  |
| C  | -0.3845230 | -1.2239801 | 2.4722528  |
| N  | -0.4323020 | -0.4378911 | 1.3858608  |
| H  | 2.5614800  | 1.0452209  | 1.6960818  |
| H  | 0.6862080  | -1.9233311 | 4.1745248  |
| H  | -1.2388180 | -1.8844681 | 2.6186368  |
| C  | 0.4773500  | 1.2407939  | -0.0683992 |
| C  | 1.3853710  | 2.2431499  | -0.3957362 |
| C  | -0.7298260 | 1.6685959  | -1.9993882 |
| C  | 1.2443560  | 2.9787119  | -1.5699102 |
| H  | 2.2401170  | 2.4118479  | 0.2477808  |
| H  | -1.5911490 | 1.4005189  | -2.6114712 |
| C  | 0.1374200  | 2.6751959  | -2.3709132 |
| H  | -0.0474780 | 3.2094259  | -3.3002582 |
| N  | -0.5682510 | 0.9588199  | -0.8738792 |
| Ir | -1.7918880 | -0.7508111 | -0.2962612 |
| C  | -4.4889920 | 3.8156529  | 1.2240578  |
| F  | -5.9033800 | -2.5144981 | 2.4857318  |
| F  | -3.1808840 | -5.8583811 | 0.7477668  |
| F  | -1.9048470 | -2.4043271 | -5.2893982 |
| F  | -5.6714760 | -0.0159791 | -3.9723412 |
| C  | 2.6873720  | -3.9233391 | -0.7637552 |
| P  | 4.2995150  | -0.0912881 | -0.7819882 |
| F  | 2.7328390  | -0.4959341 | -0.4738512 |
| F  | 3.7795360  | 0.8372919  | -2.0111652 |
| F  | 4.1257970  | 1.2145199  | 0.2225068  |
| F  | 4.7486120  | -0.9680371 | 0.5068068  |
| F  | 4.4147710  | -1.3709181 | -1.7504812 |
| F  | 5.8174290  | 0.3306879  | -1.0676802 |
| F  | -5.6425360 | 4.2178419  | 0.6805858  |

|   |            |            |            |
|---|------------|------------|------------|
| F | -4.4473940 | 4.3173249  | 2.4629648  |
| F | -3.4920410 | 4.3623879  | 0.5258088  |
| F | 2.2923010  | -5.1387561 | -0.3347642 |
| F | 3.7241720  | -4.1157371 | -1.5699442 |
| F | 3.0800510  | -3.2423861 | 0.3069448  |
| C | 3.0599550  | -0.5240541 | 3.9241558  |
| C | 4.0954940  | 0.5363039  | 3.5570808  |
| H | 4.4457410  | 0.4268399  | 2.5229728  |
| H | 3.7033410  | 1.5545849  | 3.6937238  |
| H | 4.9679420  | 0.4287389  | 4.2146298  |
| C | 3.6764790  | -1.9060611 | 3.6658448  |
| H | 4.5897130  | -2.0199651 | 4.2661028  |
| H | 2.9918380  | -2.7213721 | 3.9376568  |
| H | 3.9475090  | -2.0128501 | 2.6081498  |
| C | 2.7013050  | -0.3760721 | 5.4061498  |
| H | 2.2421080  | 0.6012379  | 5.6101168  |
| H | 2.0118700  | -1.1557601 | 5.7562968  |
| H | 3.6132570  | -0.4526101 | 6.0132388  |
| C | 2.2228120  | 4.0626029  | -1.9933912 |
| C | 1.4767110  | 5.4006299  | -2.0614052 |
| H | 0.6494500  | 5.3823349  | -2.7837882 |
| H | 1.0647830  | 5.6766839  | -1.0806622 |
| H | 2.1700000  | 6.1943269  | -2.3716642 |
| C | 2.7847670  | 3.7075599  | -3.3756002 |
| H | 3.5072920  | 4.4749729  | -3.6852322 |
| H | 3.2991980  | 2.7403759  | -3.3432532 |
| H | 2.0023500  | 3.6624979  | -4.1450052 |
| C | 3.3912480  | 4.1958649  | -1.0208542 |
| H | 3.0561200  | 4.4978089  | -0.0179002 |
| H | 3.9563400  | 3.2598889  | -0.9357602 |
| H | 4.0746500  | 4.9751129  | -1.3825692 |

**\*Ir(III)**

|   |            |            |            |
|---|------------|------------|------------|
| N | -3.2520095 | 0.3074351  | 0.6210907  |
| N | -0.4257435 | -1.9664199 | -1.3309953 |
| C | -2.8188065 | -2.2842889 | 0.4701587  |
| C | -2.5278185 | -3.6448959 | 0.3590997  |
| C | -3.3449265 | -4.5744669 | 0.9693877  |
| C | -4.4903315 | -4.1996199 | 1.7062867  |
| C | -4.7985505 | -2.8760739 | 1.8160897  |
| C | -4.0029775 | -1.8503239 | 1.2249797  |
| C | -4.2452675 | -0.4697409 | 1.2860947  |

|   |            |            |            |
|---|------------|------------|------------|
| C | -5.3373165 | 0.2103891  | 1.9027537  |
| C | -5.4256125 | 1.5690971  | 1.8739807  |
| C | -4.3965755 | 2.3125101  | 1.2153797  |
| C | -3.3498165 | 1.6340681  | 0.6164007  |
| C | -2.7635355 | -0.9594629 | -2.0458063 |
| C | -3.9989405 | -0.3951989 | -2.3634353 |
| C | -4.5061345 | -0.5481039 | -3.6444023 |
| C | -3.8323065 | -1.2457889 | -4.6362933 |
| C | -2.6115395 | -1.8030389 | -4.3065223 |
| C | -2.0427275 | -1.6828979 | -3.0348373 |
| C | -0.7608955 | -2.2470139 | -2.6243343 |
| C | 0.1005625  | -3.0245409 | -3.4013043 |
| C | 1.2628505  | -3.5320859 | -2.8456343 |
| C | 1.5686905  | -3.2534969 | -1.5200903 |
| C | 0.7020675  | -2.4512959 | -0.7998963 |
| H | -1.6679035 | -3.9988639 | -0.2074303 |
| H | -5.1171285 | -4.9532649 | 2.1746907  |
| H | -6.1036625 | -0.3791679 | 2.3929027  |
| H | -6.2587195 | 2.0924791  | 2.3368617  |
| H | -2.5611605 | 2.1759351  | 0.0971627  |
| H | -4.5819735 | 0.1636471  | -1.6326273 |
| H | -4.2432575 | -1.3553669 | -5.6349053 |
| H | -0.1509475 | -3.2375149 | -4.4324463 |
| H | 1.9355035  | -4.1455699 | -3.4406213 |
| H | 0.9192535  | -2.1829349 | 0.2313007  |
| C | 0.5837895  | 0.4243861  | 1.1578867  |
| C | 1.7015205  | 0.4561431  | 1.9877797  |
| C | 1.7918525  | -0.3863289 | 3.0922167  |
| C | 0.6834635  | -1.2029109 | 3.3545817  |
| C | -0.3939045 | -1.1995729 | 2.4932217  |
| N | -0.4371425 | -0.4254919 | 1.3986137  |
| H | 2.5496175  | 1.0697111  | 1.7060697  |
| H | 0.6707275  | -1.8782729 | 4.2071827  |
| H | -1.2472465 | -1.8606649 | 2.6425077  |
| C | 0.4712735  | 1.2427021  | -0.0689563 |
| C | 1.3723005  | 2.2510191  | -0.3970103 |
| C | -0.7202185 | 1.6408421  | -2.0164193 |
| C | 1.2369775  | 2.9728911  | -1.5803543 |
| H | 2.2186015  | 2.4347861  | 0.2536437  |
| H | -1.5755125 | 1.3635681  | -2.6325553 |
| C | 0.1412215  | 2.6511411  | -2.3896203 |
| H | -0.0405265 | 3.1758001  | -3.3249143 |

|    |            |            |            |
|----|------------|------------|------------|
| N  | -0.5621405 | 0.9434701  | -0.8827373 |
| Ir | -1.7953295 | -0.7743599 | -0.3004713 |
| C  | -4.4783505 | 3.7959331  | 1.1842837  |
| F  | -5.8899325 | -2.5370689 | 2.5170457  |
| F  | -3.0728805 | -5.8746839 | 0.8788077  |
| F  | -1.9728605 | -2.4730499 | -5.2725143 |
| F  | -5.6830635 | -0.0062139 | -3.9449943 |
| C  | 2.7365915  | -3.9040329 | -0.8379623 |
| P  | 4.2785665  | -0.0814789 | -0.7648563 |
| F  | 2.7070975  | -0.4595229 | -0.4435283 |
| F  | 3.7629575  | 0.8319521  | -2.0063753 |
| F  | 4.1262175  | 1.2407451  | 0.2192067  |
| F  | 4.7218615  | -0.9440129 | 0.5353357  |
| F  | 4.3678275  | -1.3825299 | -1.7095573 |
| F  | 5.7998645  | 0.3119721  | -1.0673593 |
| F  | -5.6210345 | 4.2058411  | 0.6144397  |
| F  | -4.4677845 | 4.3119821  | 2.4219977  |
| F  | -3.4664555 | 4.3493181  | 0.5066457  |
| F  | 2.3487565  | -5.0935539 | -0.3363083 |
| F  | 3.7270395  | -4.1457459 | -1.6891823 |
| F  | 3.1923895  | -3.1815309 | 0.1759057  |
| C  | 3.0511355  | -0.4979109 | 3.9350767  |
| C  | 4.0894095  | 0.5576281  | 3.5626397  |
| H  | 4.4332275  | 0.4476951  | 2.5267317  |
| H  | 3.7021445  | 1.5773221  | 3.7024817  |
| H  | 4.9650615  | 0.4459991  | 4.2151257  |
| C  | 3.6542665  | -1.8850179 | 3.6683007  |
| H  | 4.5848195  | -1.9986269 | 4.2412837  |
| H  | 2.9739115  | -2.6937409 | 3.9691877  |
| H  | 3.8918915  | -2.0045679 | 2.6034207  |
| C  | 2.7049045  | -0.3510019 | 5.4199567  |
| H  | 2.2573085  | 0.6302671  | 5.6301387  |
| H  | 2.0104485  | -1.1245309 | 5.7736327  |
| H  | 3.6206805  | -0.4384359 | 6.0197217  |
| C  | 2.2081115  | 4.0629811  | -2.0044033 |
| C  | 1.4503795  | 5.3942621  | -2.0777723 |
| H  | 0.6256545  | 5.3668711  | -2.8027533 |
| H  | 1.0326345  | 5.6689111  | -1.0992203 |
| H  | 2.1379135  | 6.1930661  | -2.3876603 |
| C  | 2.7769285  | 3.7099371  | -3.3843753 |
| H  | 3.4942245  | 4.4827041  | -3.6926203 |
| H  | 3.2991355  | 2.7469541  | -3.3501153 |

|   |           |           |            |
|---|-----------|-----------|------------|
| H | 1.9976915 | 3.6582481 | -4.1565633 |
| C | 3.3725125 | 4.2075681 | -1.0288203 |
| H | 3.0327045 | 4.5142651 | -0.0289563 |
| H | 3.9407765 | 3.2742091 | -0.9363393 |
| H | 4.0536515 | 4.9876471 | -1.3928363 |

**Ir(II)**

|   |            |            |            |
|---|------------|------------|------------|
| N | -1.8157945 | -1.8819866 | -0.8328342 |
| N | -1.8170515 | 1.8811014  | 0.8329228  |
| C | -3.1669625 | 0.2961494  | -1.3790782 |
| C | -3.8550765 | 1.4844494  | -1.6378132 |
| C | -4.7937425 | 1.5301504  | -2.6542602 |
| C | -5.0979145 | 0.4326874  | -3.4502262 |
| C | -4.4197195 | -0.7387736 | -3.1870452 |
| C | -3.4595935 | -0.8486366 | -2.1739992 |
| C | -2.7083045 | -2.0489716 | -1.8527292 |
| C | -2.8254045 | -3.3066326 | -2.4639042 |
| C | -2.0413625 | -4.3564846 | -2.0347212 |
| C | -1.1330935 | -4.1549436 | -0.9949292 |
| C | -1.0499815 | -2.9021296 | -0.4214182 |
| C | -3.1670265 | -0.2978476 | 1.3788818  |
| C | -3.8545255 | -1.4865366 | 1.6374508  |
| C | -4.7935685 | -1.5327266 | 2.6535258  |
| C | -5.0987065 | -0.4353926 | 3.4492998  |
| C | -4.4210885 | 0.7364474  | 3.1863138  |
| C | -3.4606035 | 0.8468064  | 2.1736618  |
| C | -2.7099105 | 2.0475624  | 1.8526008  |
| C | -2.8278065 | 3.3051384  | 2.4637998  |
| C | -2.0442155 | 4.3554234  | 2.0348588  |
| C | -1.1355735 | 4.1544044  | 0.9952868  |
| C | -1.0516585 | 2.9016574  | 0.4217578  |
| H | -3.6765505 | 2.3900364  | -1.0587442 |
| H | -5.8373205 | 0.4884944  | -4.2425432 |
| H | -3.5361915 | -3.4429486 | -3.2695082 |
| H | -2.1260065 | -5.3375556 | -2.4995692 |
| H | -0.3622645 | -2.6859526 | 0.3936498  |
| H | -3.6752595 | -2.3920556 | 1.0585038  |
| H | -5.8384325 | -0.4915696 | 4.2412908  |
| H | -3.5388575 | 3.4410744  | 3.2692308  |
| H | -2.1295065 | 5.3364294  | 2.4997268  |
| H | -0.3636185 | 2.6858804  | -0.3931442 |
| C | 1.2011865  | 0.2324784  | -0.6717332 |

|    |            |            |            |
|----|------------|------------|------------|
| C  | 2.3684125  | 0.5252534  | -1.4230332 |
| C  | 2.3135015  | 0.9764054  | -2.7219322 |
| C  | 1.0253455  | 1.1399594  | -3.2978692 |
| C  | -0.0873775 | 0.8546334  | -2.5371322 |
| N  | -0.0375045 | 0.4237064  | -1.2692762 |
| H  | 3.3367035  | 0.3948954  | -0.9424602 |
| H  | 0.8903865  | 1.4863784  | -4.3174102 |
| H  | -1.0903695 | 0.9828434  | -2.9481462 |
| C  | 1.2012925  | -0.2318116 | 0.6717838  |
| C  | 2.3686435  | -0.5241536 | 1.4230658  |
| C  | -0.0869995 | -0.8542536 | 2.5372848  |
| C  | 2.3139205  | -0.9751676 | 2.7220198  |
| H  | 3.3368785  | -0.3935736 | 0.9424428  |
| H  | -1.0899365 | -0.9828036 | 2.9483228  |
| C  | 1.0258435  | -1.1390726 | 3.2980348  |
| H  | 0.8910595  | -1.4854206 | 4.3176238  |
| N  | -0.0373035 | -0.4234586 | 1.2693738  |
| Ir | -1.7303835 | -0.0004106 | 0.0000328  |
| C  | -0.2791965 | -5.2896986 | -0.5301382 |
| F  | -4.7145605 | -1.7968566 | -3.9576352 |
| F  | -5.4398345 | 2.6716124  | -2.8917652 |
| F  | -4.7168825 | 1.7944084  | 3.9567078  |
| F  | -5.4390785 | -2.6745566 | 2.8908378  |
| C  | -0.2821155 | 5.2896144  | 0.5308028  |
| C  | 3.5988405  | -1.2895006 | 3.4834408  |
| C  | 3.3211385  | -1.7589456 | 4.9101398  |
| H  | 4.2704965  | -1.9702166 | 5.4205448  |
| H  | 2.7930695  | -0.9944356 | 5.4965128  |
| H  | 2.7241055  | -2.6809906 | 4.9281758  |
| C  | 4.4729145  | -0.0329856 | 3.5578488  |
| H  | 5.3988095  | -0.2453326 | 4.1117878  |
| H  | 4.7564405  | 0.3307974  | 2.5619468  |
| H  | 3.9460775  | 0.7812054  | 4.0739728  |
| C  | 4.3622585  | -2.4019346 | 2.7561388  |
| H  | 5.2851375  | -2.6502236 | 3.3002308  |
| H  | 3.7528305  | -3.3132306 | 2.6845598  |
| H  | 4.6440145  | -2.1076006 | 1.7369648  |
| C  | 3.5982985  | 1.2912914  | -3.4833382 |
| C  | 4.3613355  | 2.4038654  | -2.7558542 |
| H  | 4.6431625  | 2.1094624  | -1.7367202 |
| H  | 5.2841395  | 2.6525444  | -3.2998962 |
| H  | 3.7516015  | 3.3149474  | -2.6841412 |

|   |            |            |            |
|---|------------|------------|------------|
| C | 4.4728065  | 0.0350914  | -3.5579462 |
| H | 3.9462315  | -0.7792036 | -4.0741752 |
| H | 5.3986125  | 0.2478364  | -4.1118802 |
| H | 4.7564835  | -0.3287416 | -2.5621062 |
| C | 3.3204395  | 1.7608714  | -4.9099622 |
| H | 2.7925515  | 0.9963144  | -5.4964362 |
| H | 2.7231715  | 2.6827654  | -4.9278422 |
| H | 4.2697295  | 1.9724644  | -5.4203602 |
| F | 0.4769975  | -5.7615556 | -1.5289992 |
| F | 0.5327745  | -4.9354926 | 0.4663738  |
| F | -1.0319805 | -6.3115106 | -0.1029792 |
| F | -1.0353095 | 6.3112024  | 0.1038198  |
| F | 0.4738215  | 5.7615784  | 1.5298098  |
| F | 0.5300635  | 4.9359624  | -0.4657312 |

**Ir(IV)**

|   |            |            |            |
|---|------------|------------|------------|
| N | 3.2381711  | -0.0234901 | -0.2571658 |
| N | -0.0155989 | -2.4656861 | 0.4603802  |
| C | 2.5643401  | -2.3996871 | -1.1143308 |
| C | 2.1908061  | -3.6893501 | -1.5023488 |
| C | 2.9773771  | -4.3904681 | -2.3981528 |
| C | 4.1471221  | -3.8722081 | -2.9508918 |
| C | 4.5177201  | -2.6067091 | -2.5615818 |
| C | 3.7668541  | -1.8431791 | -1.6518488 |
| C | 4.1130481  | -0.5233411 | -1.1816628 |
| C | 5.2248451  | 0.2497439  | -1.5672628 |
| C | 5.4242851  | 1.4970479  | -1.0214448 |
| C | 4.5180531  | 1.9830609  | -0.0750708 |
| C | 3.4415051  | 1.1791219  | 0.2872292  |
| C | 2.2706581  | -2.1389971 | 1.7195472  |
| C | 3.5182041  | -1.9579311 | 2.3171162  |
| C | 3.8086811  | -2.6101941 | 3.5056102  |
| C | 2.9028741  | -3.4466341 | 4.1405152  |
| C | 1.6757711  | -3.6292281 | 3.5316712  |
| C | 1.3252371  | -3.0060141 | 2.3303392  |
| C | 0.0685471  | -3.1903701 | 1.6139032  |
| C | -0.9761239 | -4.0489651 | 1.9621782  |
| C | -2.0428229 | -4.2190591 | 1.0991022  |
| C | -2.0696589 | -3.5263231 | -0.1046828 |
| C | -1.0505259 | -2.6322781 | -0.3736608 |
| H | 1.2945221  | -4.1699341 | -1.1134558 |
| H | 4.7459681  | -4.4437031 | -3.6526368 |



|    |            |            |            |
|----|------------|------------|------------|
| H  | 5.9141281  | -0.1431371 | -2.3037728 |
| H  | 6.2742621  | 2.1067669  | -1.3207288 |
| H  | 2.7240821  | 1.5027299  | 1.0390172  |
| H  | 4.2806431  | -1.3155701 | 1.8782952  |
| H  | 3.1440761  | -3.9471511 | 5.0728362  |
| H  | -0.9313699 | -4.5968221 | 2.8951422  |
| H  | -2.8545369 | -4.8972171 | 1.3521262  |
| H  | -1.0574549 | -2.0279661 | -1.2765338 |
| C  | -0.3539069 | 0.9204569  | -0.9069648 |
| C  | -1.2833619 | 1.5430869  | -1.7240978 |
| C  | -1.3869429 | 1.2129239  | -3.0736238 |
| C  | -0.4519769 | 0.3011879  | -3.5688508 |
| C  | 0.4534051  | -0.2905351 | -2.7044348 |
| N  | 0.4817861  | -0.0221061 | -1.3948918 |
| H  | -2.0216539 | 2.1979339  | -1.2726378 |
| H  | -0.4428949 | 0.0095559  | -4.6153388 |
| H  | 1.1636151  | -1.0397901 | -3.0541888 |
| C  | -0.2839899 | 1.1729239  | 0.5416302  |
| C  | -1.0080949 | 2.1825039  | 1.1607402  |
| C  | 0.5263251  | 0.4651529  | 2.5897292  |
| C  | -1.0483709 | 2.2848399  | 2.5464452  |
| H  | -1.6027639 | 2.8527219  | 0.5542632  |
| H  | 1.1759471  | -0.2287541 | 3.1227192  |
| C  | -0.2293559 | 1.4051629  | 3.2610842  |
| H  | -0.1938079 | 1.4252029  | 4.3479902  |
| N  | 0.4940221  | 0.3345569  | 1.2561022  |
| Ir | 1.5637101  | -1.1743831 | 0.1070722  |
| C  | 4.7835561  | 3.2865609  | 0.6186252  |
| F  | 5.6438351  | -2.1091861 | -3.0875978 |
| F  | 2.6143351  | -5.6156071 | -2.7601698 |
| F  | 0.8090691  | -4.4404321 | 4.1499652  |
| F  | 5.0011741  | -2.4269581 | 4.0704482  |
| C  | -3.1053649 | -3.8499881 | -1.1401598 |
| P  | -3.8924919 | -0.1562441 | 0.6016192  |
| F  | -2.8567429 | -0.4690671 | -0.6349788 |
| F  | -2.6221119 | -0.2471511 | 1.6267552  |
| F  | -3.5899679 | 1.4508149  | 0.3930422  |
| F  | -5.1063929 | -0.0491691 | -0.4487108 |
| F  | -4.1510309 | -1.7415951 | 0.7887002  |
| F  | -4.8658229 | 0.1931039  | 1.8363862  |
| F  | 5.7946941  | 3.1453999  | 1.4853832  |
| F  | 5.1405711  | 4.2294389  | -0.2514618 |

|    |            |            |            |
|----|------------|------------|------------|
| F  | 3.7224061  | 3.7157489  | 1.2987332  |
| F  | -4.2680819 | -4.1875481 | -0.5933058 |
| F  | -3.3021319 | -2.8603591 | -2.0036868 |
| F  | -2.6876689 | -4.9154401 | -1.8551318 |
| C  | -2.5374949 | 1.7705379  | -3.8923618 |
| C  | -2.4514719 | 1.3557379  | -5.3583258 |
| H  | -3.2964399 | 1.7872509  | -5.9101138 |
| H  | -1.5275059 | 1.7133829  | -5.8353288 |
| H  | -2.5090689 | 0.2653969  | -5.4796138 |
| C  | -2.5390509 | 3.3010519  | -3.8196758 |
| H  | -3.3738169 | 3.6975479  | -4.4132358 |
| H  | -2.6662019 | 3.6690929  | -2.7940818 |
| H  | -1.6064169 | 3.7217969  | -4.2208088 |
| C  | -3.8391329 | 1.2162789  | -3.2924268 |
| H  | -4.6974669 | 1.5972569  | -3.8632498 |
| H  | -3.8573669 | 0.1188829  | -3.3299158 |
| H  | -3.9754699 | 1.4921779  | -2.2398608 |
| C  | -2.0092579 | 3.2142969  | 3.2663972  |
| C  | -2.7212639 | 4.1631229  | 2.3050362  |
| H  | -3.3365089 | 3.6108659  | 1.5829582  |
| H  | -3.3907819 | 4.8205309  | 2.8746432  |
| H  | -2.0133569 | 4.8048479  | 1.7603462  |
| C  | -1.2707079 | 4.0405269  | 4.3223502  |
| H  | -1.9839979 | 4.6900409  | 4.8474292  |
| H  | -0.7826759 | 3.4153079  | 5.0814322  |
| H  | -0.5037989 | 4.6812149  | 3.8651112  |
| C  | -3.0680269 | 2.3216039  | 3.9330482  |
| H  | -2.6233979 | 1.6625459  | 4.6910482  |
| H  | -3.8172809 | 2.9512339  | 4.4332602  |
| H  | -3.5781939 | 1.6904989  | 3.1933752  |
| Br | 2.2889451  | 2.9651479  | -1.7524158 |

**Ni(II)<sup>T</sup>**

|    |             |             |             |
|----|-------------|-------------|-------------|
| Ni | -0.00745700 | 0.01219500  | -0.43160100 |
| Br | 1.32645700  | -1.82379700 | -1.00572100 |
| C  | 3.58773200  | 0.77336600  | 0.44944200  |
| C  | 3.30419300  | 0.61456800  | 1.93943200  |
| C  | 1.81203400  | 0.30966000  | 1.95082400  |
| C  | 2.38629300  | 1.56768800  | -0.03397600 |
| H  | 4.53477200  | 1.27908400  | 0.23239300  |
| H  | 3.59330900  | -0.20945500 | -0.04191500 |
| H  | 3.51070100  | 1.55498900  | 2.47179300  |

|                           |             |             |             |
|---------------------------|-------------|-------------|-------------|
| H                         | 3.89323900  | -0.17794100 | 2.41416900  |
| H                         | 1.64495200  | -0.76273700 | 1.78542400  |
| H                         | 1.29907300  | 0.60594200  | 2.87380600  |
| H                         | 2.17212800  | 1.43336600  | -1.10220200 |
| H                         | 2.51165800  | 2.64363000  | 0.15218400  |
| N                         | 1.24569500  | 1.05508900  | 0.79066700  |
| H                         | 0.67358400  | 1.84047400  | 1.09759400  |
| C                         | -3.56133100 | -1.44040000 | 0.83709300  |
| C                         | -3.31190100 | -0.08322100 | 1.48595300  |
| C                         | -1.86401800 | -0.19461800 | 1.93489900  |
| C                         | -2.26973500 | -1.67986200 | 0.06817700  |
| H                         | -3.70076400 | -2.21339400 | 1.60761700  |
| H                         | -4.44051700 | -1.45530100 | 0.18387300  |
| H                         | -3.99030800 | 0.14082300  | 2.31645300  |
| H                         | -3.39397700 | 0.71783600  | 0.73832000  |
| H                         | -1.37009000 | 0.77920000  | 2.03397600  |
| H                         | -1.78640000 | -0.72457000 | 2.89625600  |
| H                         | -2.31555800 | -1.20875800 | -0.92425700 |
| H                         | -2.00564500 | -2.73243200 | -0.07730300 |
| N                         | -1.20207300 | -0.99893100 | 0.87093100  |
| H                         | -0.58156900 | -1.69898600 | 1.27413300  |
| Br                        | -1.35059200 | 1.83095600  | -1.03055700 |
| <b>Ni(II)<sup>S</sup></b> |             |             |             |
| N                         | -0.8750509  | 1.4407462   | -0.1956553  |
| H                         | -1.5409839  | 2.0987692   | -0.6125343  |
| C                         | -0.4927269  | 2.0404482   | 1.1058017   |
| H                         | -0.0673089  | 1.2591212   | 1.7511477   |
| H                         | -1.3946849  | 2.4308462   | 1.5891797   |
| C                         | 0.5525071   | 3.0778722   | 0.7299097   |
| H                         | 1.1603581   | 3.4078712   | 1.5795467   |
| H                         | 0.0553951   | 3.9644622   | 0.3100907   |
| C                         | 1.3652851   | 2.3530632   | -0.3445733  |
| H                         | 2.1545091   | 1.7504552   | 0.1271727   |
| H                         | 1.8589871   | 3.0366292   | -1.0437963  |
| C                         | 0.3471741   | 1.4348942   | -1.0452243  |
| H                         | 0.7298101   | 0.4143212   | -1.1553603  |
| H                         | 0.0703241   | 1.7833062   | -2.0468003  |
| Ni                        | -2.1372989  | -0.0596578  | -0.0033923  |
| Br                        | -3.7981479  | 1.5223022   | -0.2421693  |
| Br                        | -3.6852099  | -1.7525248  | 0.2357027   |
| N                         | -0.7788019  | -1.4688008  | 0.1921427   |
| H                         | -1.3863059  | -2.1571838  | 0.6481367   |

|   |            |            |            |
|---|------------|------------|------------|
| C | -0.3837029 | -2.0728928 | -1.1159563 |
| H | -0.3686619 | -1.2945188 | -1.8882733 |
| H | -1.1635879 | -2.7876928 | -1.3999103 |
| C | 1.0037891  | -2.7020518 | -0.8961153 |
| H | 1.7740621  | -2.1144878 | -1.4150403 |
| H | 1.0640241  | -3.7238328 | -1.2856433 |
| C | 1.2241161  | -2.6311828 | 0.6172547  |
| H | 2.2820101  | -2.5908778 | 0.8997817  |
| H | 0.7780841  | -3.5037088 | 1.1160007  |
| C | 0.4516591  | -1.3778588 | 1.0021957  |
| H | 1.0135921  | -0.4757418 | 0.7233097  |
| H | 0.1867861  | -1.3020928 | 2.0630707  |

### Ni(0)<sup>S</sup>

|    |             |             |             |
|----|-------------|-------------|-------------|
| Ni | 0.80690400  | -0.26573100 | -0.31732000 |
| Br | 1.77579900  | 2.67751700  | -0.99086800 |
| C  | -1.54638500 | 1.60825300  | 1.25118600  |
| C  | -2.36042100 | 0.89571800  | 0.32208200  |
| C  | -1.87162400 | 0.56834000  | -0.91581200 |
| C  | -0.51747500 | 0.82551200  | -1.26906800 |
| C  | 0.32070600  | 1.52974600  | -0.31022900 |
| C  | -0.26854000 | 1.96605100  | 0.92734700  |
| H  | -1.96842700 | 1.89523900  | 2.21365900  |
| H  | -2.52958600 | 0.09861900  | -1.64713100 |
| H  | -0.24846900 | 0.83065500  | -2.32885000 |
| H  | 0.32251700  | 2.58030000  | 1.60714100  |
| C  | -3.71717200 | 0.47509100  | 0.75331200  |
| F  | -4.42651600 | 1.48475900  | 1.27995000  |
| F  | -4.44466800 | -0.04633700 | -0.24531200 |
| F  | -3.65407300 | -0.47150400 | 1.71554800  |
| C  | 0.51229500  | -2.77902800 | -1.92833000 |
| C  | -0.83534000 | -2.64311100 | 0.03035900  |
| C  | -1.75062600 | -2.89470400 | -1.17781100 |
| C  | -0.90660200 | -2.52940900 | -2.40276900 |
| H  | 1.27663300  | -2.24832900 | -2.50956300 |
| H  | 0.73750200  | -3.86012900 | -1.95591900 |
| H  | -0.75246200 | -3.53981200 | 0.66255300  |
| H  | -1.19721300 | -1.82033000 | 0.66058900  |
| H  | -2.04290300 | -3.95206600 | -1.21966200 |
| H  | -2.67435200 | -2.30696200 | -1.11289900 |
| H  | -1.16058900 | -3.12150500 | -3.28909400 |
| H  | -1.02626400 | -1.46915500 | -2.65670200 |

|   |            |             |             |
|---|------------|-------------|-------------|
| N | 0.49719500 | -2.27903000 | -0.53626600 |
| H | 1.22712900 | -2.74443500 | -0.00224000 |
| C | 3.51511500 | -1.34127300 | 0.56552000  |
| C | 2.44128100 | 0.00200900  | 2.13557300  |
| C | 2.20226300 | -1.41647600 | 2.62428300  |
| C | 3.14340800 | -2.26002400 | 1.74480900  |
| H | 3.40379000 | -1.81117900 | -0.42052200 |
| H | 4.56270000 | -1.01101800 | 0.65676100  |
| H | 3.36499300 | 0.41627400  | 2.57817500  |
| H | 1.61220100 | 0.68923300  | 2.34071900  |
| H | 2.39761800 | -1.53539900 | 3.69548200  |
| H | 1.15108500 | -1.68462200 | 2.44572200  |
| H | 4.04487500 | -2.55722200 | 2.29361400  |
| H | 2.66798000 | -3.19559300 | 1.41790400  |
| N | 2.59729600 | -0.19368700 | 0.68460500  |
| H | 2.98553600 | 0.64141800  | 0.24284300  |

**Ni(0)<sup>T</sup>**

|    |            |            |            |
|----|------------|------------|------------|
| Ni | 0.6284945  | -0.5382290 | -0.2903391 |
| Br | 1.3497545  | -3.6392080 | -0.4212871 |
| C  | -2.4429445 | -2.0642760 | -1.1632331 |
| C  | -2.9617235 | -1.8265940 | 0.1355179  |
| C  | -2.1159055 | -2.0156290 | 1.2551659  |
| C  | -0.7867945 | -2.3176370 | 1.0881439  |
| C  | -0.1939435 | -2.3358190 | -0.2339431 |
| C  | -1.1172735 | -2.3611500 | -1.3476131 |
| H  | -3.1072065 | -1.9870060 | -2.0235371 |
| H  | -2.5259705 | -1.9048510 | 2.2580909  |
| H  | -0.1447345 | -2.4801330 | 1.9536329  |
| H  | -0.7258095 | -2.5484170 | -2.3467131 |
| C  | -4.2869795 | -1.2009320 | 0.2906799  |
| F  | -5.1702815 | -1.5973090 | -0.6355881 |
| F  | -4.8329485 | -1.4110320 | 1.4949889  |
| F  | -4.2155025 | 0.1621400  | 0.1560089  |
| C  | 3.4551715  | 0.0337090  | -0.7463701 |
| C  | 2.6367785  | 0.9598860  | 1.2214789  |
| C  | 3.2625375  | -0.3612000 | 1.6527429  |
| C  | 3.8874135  | -0.9313370 | 0.3610169  |
| H  | 3.2024325  | -0.4665040 | -1.6886661 |
| H  | 4.2393105  | 0.7837760  | -0.9450511 |
| H  | 3.3782245  | 1.7770340  | 1.2671499  |
| H  | 1.7603795  | 1.2525990  | 1.8124509  |

|   |            |            |            |
|---|------------|------------|------------|
| H | 3.9915905  | -0.2193690 | 2.4581269  |
| H | 2.4837255  | -1.0398500 | 2.0276909  |
| H | 4.9795505  | -0.9989970 | 0.4165939  |
| H | 3.4981245  | -1.9369190 | 0.1623229  |
| N | 2.2544935  | 0.6987720  | -0.1837731 |
| H | 2.0591525  | 1.5691580  | -0.6762041 |
| C | -1.2925785 | 1.4281480  | -1.5472831 |
| C | -1.0541655 | 1.8399440  | 0.7218959  |
| C | -0.3318595 | 3.0024610  | 0.0359019  |
| C | -0.4531195 | 2.7014240  | -1.4749111 |
| H | -1.0385975 | 0.7719900  | -2.3882061 |
| H | -2.3678645 | 1.6686470  | -1.6118841 |
| H | -2.1029595 | 2.1071360  | 0.9357409  |
| H | -0.5934935 | 1.5152190  | 1.6641219  |
| H | -0.7804595 | 3.9642710  | 0.3077339  |
| H | 0.7208195  | 3.0521290  | 0.3485319  |
| H | -0.9129935 | 3.5233670  | -2.0341721 |
| H | 0.5346905  | 2.5308580  | -1.9266031 |
| N | -1.0084575 | 0.7534410  | -0.2695021 |
| H | -1.7580755 | 0.0862900  | -0.0708501 |

**TSa1**

|   |            |            |            |
|---|------------|------------|------------|
| C | 0.6836228  | 2.0340607  | -0.7001671 |
| C | -0.8480372 | 2.1550467  | 1.1055379  |
| C | -0.3778122 | 3.5770037  | 0.8408009  |
| C | 0.9263848  | 3.3398397  | 0.0788969  |
| H | 1.5136748  | 1.3298387  | -0.5717881 |
| H | 0.5503758  | 2.1965177  | -1.7768361 |
| H | -1.9081952 | 2.0487487  | 1.3643689  |
| H | -0.2663532 | 1.6959647  | 1.9163139  |
| H | -1.1095492 | 4.1051827  | 0.2096899  |
| H | -0.2420622 | 4.1667907  | 1.7549669  |
| H | 1.2033648  | 4.1763657  | -0.5725081 |
| H | 1.7513468  | 3.1949217  | 0.7905849  |
| N | -0.5610962 | 1.4236557  | -0.1463851 |
| H | -1.3190062 | 1.6495497  | -0.7882171 |
| C | -2.8875792 | -0.5328873 | -1.7749091 |
| C | -2.4690182 | -2.6161813 | -0.8753431 |
| C | -3.6002462 | -2.0304203 | -0.0226571 |
| C | -3.7652682 | -0.5829713 | -0.5315171 |
| H | -2.5205902 | 0.4677467  | -2.0365931 |
| H | -3.4339532 | -0.9295663 | -2.6500651 |

|    |            |            |            |
|----|------------|------------|------------|
| H  | -2.8791552 | -3.2161633 | -1.7063931 |
| H  | -1.7721152 | -3.2425963 | -0.3072431 |
| H  | -4.5187662 | -2.6174513 | -0.1357791 |
| H  | -3.3233262 | -2.0393423 | 1.0372789  |
| H  | -4.8052702 | -0.3144393 | -0.7476711 |
| H  | -3.3828042 | 0.1216517  | 0.2198019  |
| N  | -1.7745682 | -1.4216713 | -1.4071791 |
| H  | -1.2102392 | -1.6630093 | -2.2188091 |
| Ni | -0.4572492 | -0.6594193 | -0.0104141 |
| C  | 3.5313838  | -1.0467353 | 0.3236959  |
| C  | 2.6202298  | -1.9804813 | -0.1380701 |
| C  | 1.2977018  | -1.9715953 | 0.3294569  |
| C  | 0.8866888  | -0.9033933 | 1.1817889  |
| C  | 1.8549598  | -0.0481663 | 1.7636299  |
| C  | 3.1484458  | -0.1038073 | 1.3025199  |
| H  | 2.9486238  | -2.7593503 | -0.8242111 |
| H  | 0.6593668  | -2.8376263 | 0.1581829  |
| H  | 1.5655768  | 0.6778967  | 2.5222349  |
| H  | 3.8960368  | 0.5890577  | 1.6897049  |
| C  | 4.9426278  | -1.0291963 | -0.1444511 |
| F  | 5.2106318  | -2.0045833 | -1.0210041 |
| F  | 5.8129728  | -1.1566923 | 0.8716699  |
| F  | 5.2507198  | 0.1364067  | -0.7454801 |
| Br | -0.8224752 | -1.3784983 | 2.3925669  |

**TSa1'**

|    |            |            |            |
|----|------------|------------|------------|
| Ni | 0.5476396  | -0.5175047 | -0.2492512 |
| Br | 0.7962096  | -3.5812527 | -0.5643862 |
| C  | -2.9320244 | -1.5685527 | -1.2273192 |
| C  | -3.4709994 | -1.4547257 | 0.0661827  |
| C  | -2.6558154 | -1.7228317 | 1.1812248  |
| C  | -1.3229354 | -2.0375477 | 1.0129598  |
| C  | -0.7234484 | -2.0047167 | -0.2844452 |
| C  | -1.5992544 | -1.8773997 | -1.4051333 |
| H  | -3.5720224 | -1.3901677 | -2.0906212 |
| H  | -3.0830184 | -1.6668807 | 2.1820148  |
| H  | -0.6973524 | -2.2507177 | 1.8805858  |
| H  | -1.1859584 | -1.9631117 | -2.4102982 |
| C  | -4.8396794 | -0.9187137 | 0.2627897  |
| F  | -5.6492304 | -1.1737677 | -0.7726852 |
| F  | -5.4288684 | -1.3958397 | 1.3671868  |
| F  | -4.8265554 | 0.4313433  | 0.4035488  |

|   |            |            |            |
|---|------------|------------|------------|
| C | 3.4511886  | -0.6884727 | -0.7001473 |
| C | 2.8705986  | 0.4536323  | 1.2490408  |
| C | 3.1674906  | -0.9642867 | 1.7093858  |
| C | 3.7530616  | -1.6475147 | 0.4589018  |
| H | 3.0512536  | -1.1929777 | -1.5867793 |
| H | 4.3530216  | -0.1260147 | -0.9921452 |
| H | 3.7846186  | 1.0730543  | 1.2777968  |
| H | 2.0887006  | 0.9598433  | 1.8282818  |
| H | 3.8440826  | -0.9847617 | 2.5707608  |
| H | 2.2323186  | -1.4601317 | 2.0072067  |
| H | 4.8326156  | -1.8134257 | 0.5494208  |
| H | 3.2712836  | -2.6162367 | 0.2887407  |
| N | 2.4354106  | 0.2504263  | -0.1509922 |
| H | 2.4567566  | 1.1299983  | -0.6645032 |
| C | -1.0385224 | 1.7406003  | -1.4061373 |
| C | -0.4142234 | 2.2826343  | 0.7587908  |
| C | 0.4734726  | 3.1520753  | -0.1369672 |
| C | 0.1082796  | 2.7315283  | -1.5781512 |
| H | -1.0842714 | 0.9670703  | -2.1811513 |
| H | -2.0099054 | 2.2642303  | -1.3840933 |
| H | -1.3263324 | 2.8336233  | 1.0440628  |
| H | 0.0740146  | 1.9456013  | 1.6814308  |
| H | 0.2932656  | 4.2172583  | 0.0451338  |
| H | 1.5380926  | 2.9789743  | 0.0739998  |
| H | -0.1770924 | 3.5807973  | -2.2080942 |
| H | 0.9563326  | 2.2391413  | -2.0739363 |
| N | -0.7563464 | 1.1328363  | -0.0933272 |
| H | -1.5858514 | 0.6528853  | 0.2611188  |

**a1**

|   |            |           |            |
|---|------------|-----------|------------|
| C | 0.3603938  | 1.8001495 | -1.5547503 |
| C | 0.0858008  | 1.9182465 | 0.8375127  |
| C | 0.9723938  | 3.0606935 | 0.3698897  |
| C | 1.5586188  | 2.4850585 | -0.9132543 |
| H | 0.6399698  | 0.9563885 | -2.1911243 |
| H | -0.2225492 | 2.5109985 | -2.1574663 |
| H | -0.7244222 | 2.2140085 | 1.5149647  |
| H | 0.6879168  | 1.1509865 | 1.3358057  |
| H | 0.3742758  | 3.9592595 | 0.1521797  |
| H | 1.7294168  | 3.3323015 | 1.1137987  |
| H | 2.0070308  | 3.2372295 | -1.5715413 |
| H | 2.3300338  | 1.7381425 | -0.6753663 |



|    |            |            |            |
|----|------------|------------|------------|
| N  | -0.4937132 | 1.3240955  | -0.4100703 |
| H  | -1.4063472 | 1.7570225  | -0.5316613 |
| C  | -3.4114302 | 0.4270275  | 0.7157437  |
| C  | -3.8811952 | -1.3117595 | -0.7480523 |
| C  | -4.1898002 | -1.8490975 | 0.6531357  |
| C  | -3.6709232 | -0.7681765 | 1.6182667  |
| H  | -2.6812712 | 1.1353915  | 1.1285287  |
| H  | -4.3488752 | 0.9743845  | 0.5142227  |
| H  | -4.7873132 | -0.8983275 | -1.2199563 |
| H  | -3.4372412 | -2.0645955 | -1.4050393 |
| H  | -5.2651862 | -2.0242055 | 0.7739207  |
| H  | -3.6650312 | -2.7960915 | 0.8148307  |
| H  | -4.3731672 | -0.5288675 | 2.4244237  |
| H  | -2.7264532 | -1.0898265 | 2.0776057  |
| N  | -2.9075812 | -0.2106575 | -0.5207673 |
| H  | -2.9654822 | 0.4319815  | -1.3098883 |
| Ni | -0.8477562 | -0.6494505 | -0.3730193 |
| C  | 3.7672548  | -1.2948955 | 0.0447227  |
| C  | 3.1806698  | -1.2728895 | -1.2196673 |
| C  | 1.8020178  | -1.1439995 | -1.3425113 |
| C  | 0.9865078  | -1.0031915 | -0.2152213 |
| C  | 1.5865838  | -1.0816485 | 1.0458127  |
| C  | 2.9649848  | -1.2119175 | 1.1799877  |
| H  | 3.8057378  | -1.3761265 | -2.1055843 |
| H  | 1.3524638  | -1.1779815 | -2.3369023 |
| H  | 0.9637968  | -1.0614835 | 1.9430187  |
| H  | 3.4197318  | -1.2664505 | 2.1677357  |
| C  | 5.2524038  | -1.3496155 | 0.1739357  |
| F  | 5.8199958  | -2.0599015 | -0.8101713 |
| F  | 5.6419918  | -1.8901175 | 1.3357517  |
| F  | 5.8015528  | -0.1213155 | 0.1205907  |
| Br | -1.0858072 | -2.9107775 | -0.4443683 |

**a2**

|    |            |            |           |
|----|------------|------------|-----------|
| Ni | 1.0707772  | -0.6348991 | 0.9186186 |
| Br | 2.6586942  | -2.0258131 | 2.0092076 |
| C  | -3.0274898 | 0.6532789  | 0.3076976 |
| C  | -3.6991848 | -0.4214151 | 0.8883236 |
| C  | -2.9770018 | -1.4566821 | 1.4687056 |
| C  | -1.5836388 | -1.4132971 | 1.4546686 |
| C  | -0.8745708 | -0.3560341 | 0.8642686 |
| C  | -1.6389598 | 0.6766109  | 0.3027526 |

|           |            |            |            |
|-----------|------------|------------|------------|
| H         | -3.6019368 | 1.4635829  | -0.1421274 |
| H         | -3.5014408 | -2.2923261 | 1.9281176  |
| H         | -1.0391578 | -2.2413881 | 1.9188726  |
| H         | -1.1479698 | 1.5309969  | -0.1722204 |
| C         | -5.1925628 | -0.4105881 | 0.8787606  |
| F         | -5.6742118 | -0.2876571 | -0.3688074 |
| F         | -5.7201128 | -1.5218911 | 1.4018266  |
| F         | -5.6817508 | 0.6289089  | 1.5731526  |
| C         | 0.6857142  | -0.3772801 | -2.0820194 |
| C         | 1.8330542  | -2.2931781 | -1.4163984 |
| C         | 0.3955632  | -2.7501691 | -1.5899814 |
| C         | -0.3070168 | -1.5397281 | -2.2355684 |
| H         | 0.2142132  | 0.5515399  | -1.7405614 |
| H         | 1.2046912  | -0.1745861 | -3.0330174 |
| H         | 2.3930562  | -2.3820121 | -2.3630504 |
| H         | 2.3830842  | -2.8010251 | -0.6176184 |
| H         | 0.3197612  | -3.6629781 | -2.1902484 |
| H         | -0.0371308 | -2.9673801 | -0.6027954 |
| H         | -0.5298018 | -1.7139381 | -3.2946124 |
| H         | -1.2543868 | -1.3173091 | -1.7300924 |
| N         | 1.6583592  | -0.8596361 | -1.0770074 |
| H         | 2.5494242  | -0.3706251 | -1.1458084 |
| C         | 1.1401182  | 2.4307739  | 1.4532256  |
| C         | 3.2079732  | 1.5035429  | 0.9094056  |
| C         | 2.8187392  | 2.3535569  | -0.3034054 |
| C         | 1.4187982  | 2.9102479  | 0.0325216  |
| H         | 0.0821142  | 2.2380559  | 1.6615326  |
| H         | 1.5165082  | 3.1618029  | 2.1879466  |
| H         | 3.8300552  | 2.0912069  | 1.6033076  |
| H         | 3.7526052  | 0.5799739  | 0.6798126  |
| H         | 3.5552042  | 3.1457269  | -0.4769914 |
| H         | 2.7850022  | 1.7564129  | -1.2252514 |
| H         | 1.3646572  | 4.0014509  | -0.0437244 |
| H         | 0.6692842  | 2.5039459  | -0.6598194 |
| N         | 1.9156662  | 1.1817879  | 1.5483596  |
| H         | 2.0652092  | 0.9084309  | 2.5200416  |
| <b>a3</b> |            |            |            |
| Ni        | 1.1107324  | 0.9264822  | -0.4483686 |
| Br        | 2.0296674  | -0.0036038 | -2.4182846 |
| C         | -2.9079756 | 1.8614762  | -1.3870976 |
| C         | -3.5758466 | 1.9049112  | -0.1633806 |

|   |            |            |            |
|---|------------|------------|------------|
| C | -2.8757596 | 1.6763472  | 1.0152814  |
| C | -1.5098966 | 1.4009162  | 0.9595514  |
| C | -0.8131096 | 1.3392682  | -0.2507756 |
| C | -1.5472026 | 1.5818182  | -1.4229026 |
| H | -3.4646276 | 2.0404912  | -2.3075866 |
| H | -3.3975026 | 1.7132242  | 1.9699644  |
| H | -0.9917806 | 1.2218962  | 1.9059064  |
| H | -1.0497706 | 1.5274922  | -2.3950126 |
| C | -5.0377586 | 2.2079102  | -0.1623196 |
| F | -5.7232156 | 1.3314092  | -0.9132536 |
| F | -5.5693056 | 2.1794882  | 1.0656364  |
| F | -5.2912366 | 3.4215172  | -0.6767046 |
| C | 1.1882324  | 3.8780702  | -0.0113546 |
| C | 3.2922584  | 2.8832032  | -0.0856216 |
| C | 3.0841964  | 3.5132712  | -1.4690276 |
| C | 1.6256864  | 4.0153812  | -1.4613276 |
| H | 0.1099394  | 3.7425462  | 0.1224134  |
| H | 1.5217404  | 4.7445192  | 0.5850994  |
| H | 3.8320824  | 3.5690712  | 0.5878974  |
| H | 3.8389124  | 1.9329622  | -0.1239966 |
| H | 3.8017424  | 4.3245902  | -1.6356526 |
| H | 3.2314884  | 2.7654012  | -2.2566566 |
| H | 1.5193764  | 5.0420402  | -1.8273866 |
| H | 0.9984124  | 3.3729452  | -2.0953736 |
| N | 1.9154004  | 2.6633332  | 0.4175134  |
| H | 1.8988964  | 2.5670792  | 1.4310964  |
| C | 1.5086634  | -0.0914938 | 2.4093244  |
| C | 2.5331484  | -1.4221948 | 0.8206254  |
| C | 3.6821794  | -0.6659278 | 1.4697944  |
| C | 3.0141414  | 0.1404342  | 2.6024034  |
| H | 0.8947594  | 0.7959232  | 2.6081924  |
| H | 1.1539884  | -0.8925138 | 3.0807624  |
| H | 2.3411224  | -2.3726438 | 1.3516444  |
| H | 2.6811734  | -1.6303078 | -0.2442246 |
| H | 4.4686364  | -1.3370758 | 1.8315554  |
| H | 4.1449964  | 0.0004762  | 0.7294994  |
| H | 3.3363194  | -0.1865148 | 3.5975484  |
| H | 3.2714024  | 1.2068122  | 2.5291594  |
| N | 1.3792424  | -0.5200798 | 1.0092014  |
| H | 0.5112434  | -1.0573128 | 0.8229174  |
| C | -1.7882256 | -1.8663968 | -0.7052936 |
| C | -2.6617186 | -3.0062758 | -1.2797866 |

|   |            |            |            |
|---|------------|------------|------------|
| H | -2.3456586 | -1.2288988 | -0.0035996 |
| H | -1.3944616 | -1.2058428 | -1.4904986 |
| H | -3.6328976 | -3.0671508 | -0.7676256 |
| H | -2.8675386 | -2.8565168 | -2.3488206 |
| C | -1.1125096 | -3.3913208 | 1.0106224  |
| H | -0.2492416 | -3.7341988 | 1.6028464  |
| H | -1.7825196 | -2.8455348 | 1.6918024  |
| C | -1.8390576 | -4.5692748 | 0.3132974  |
| H | -1.2765476 | -5.5082058 | 0.4206554  |
| H | -2.8376066 | -4.7364988 | 0.7416854  |
| C | -0.6573596 | -4.2070178 | -1.7203256 |
| H | -0.1951806 | -5.2042928 | -1.6933056 |
| H | -0.7864176 | -3.9361838 | -2.7776566 |
| C | 0.2032994  | -3.1596388 | -0.9743896 |
| H | 1.0261374  | -3.6381458 | -0.4210266 |
| H | 0.6501884  | -2.4184888 | -1.6542386 |
| N | -1.9866476 | -4.2949108 | -1.1144946 |
| N | -0.6308286 | -2.4382458 | 0.0034704  |

## **TSa2**

|   |            |            |            |
|---|------------|------------|------------|
| C | -3.2442073 | -2.4821957 | -1.2255406 |
| C | -1.2544303 | -3.6759757 | -1.3695576 |
| C | -1.7772433 | -3.9714747 | 0.0317144  |
| C | -3.1379823 | -3.2420597 | 0.0997924  |
| H | -3.7023713 | -1.4883097 | -1.1404356 |
| H | -3.8198893 | -3.0630957 | -1.9659376 |
| H | -1.6235283 | -4.4233477 | -2.0937366 |
| H | -0.1615213 | -3.6294467 | -1.4306686 |
| H | -1.8594813 | -5.0481887 | 0.2170214  |
| H | -1.0804253 | -3.5595877 | 0.7735914  |
| H | -3.9798763 | -3.9323027 | 0.2265104  |
| H | -3.1587013 | -2.5417207 | 0.9447904  |
| N | -1.8395883 | -2.3577107 | -1.6583136 |
| H | -1.7737213 | -2.0988467 | -2.6439196 |
| C | -1.4743333 | -0.3559557 | 2.2121724  |
| C | -2.7492823 | 0.9928943  | 0.8447074  |
| C | -3.7759833 | 0.2530283  | 1.6995864  |
| C | -2.9087043 | -0.3772337 | 2.7986294  |
| H | -0.9911693 | -1.3437377 | 2.2287174  |
| H | -0.8356733 | 0.3111353  | 2.8314204  |
| H | -2.5232063 | 1.9737963  | 1.3292594  |
| H | -3.0764633 | 1.2052223  | -0.1824676 |

|    |            |            |            |
|----|------------|------------|------------|
| H  | -4.5691853 | 0.9010793  | 2.0934904  |
| H  | -4.2577153 | -0.5249857 | 1.0888054  |
| H  | -2.9600783 | 0.2087723  | 3.7260444  |
| H  | -3.2361403 | -1.3942017 | 3.0514434  |
| N  | -1.5783703 | 0.1358103  | 0.8501014  |
| Ni | -0.9712563 | -0.7515647 | -0.6611086 |
| C  | 3.7514937  | -1.6496157 | -0.3051036 |
| C  | 3.0430747  | -1.4076717 | 0.8729104  |
| C  | 1.6641437  | -1.2254967 | 0.8258684  |
| C  | 0.9373577  | -1.2644777 | -0.3764006 |
| C  | 1.6874017  | -1.5373407 | -1.5349356 |
| C  | 3.0685467  | -1.7259617 | -1.5146626 |
| H  | 3.5797187  | -1.3647917 | 1.8223724  |
| H  | 1.1415117  | -1.0315257 | 1.7669264  |
| H  | 1.1811677  | -1.5746227 | -2.5060816 |
| H  | 3.6179447  | -1.9207187 | -2.4344016 |
| C  | 5.2336687  | -1.7849757 | -0.2285336 |
| F  | 5.8153707  | -0.6293567 | 0.1492274  |
| F  | 5.7848447  | -2.1347797 | -1.3952146 |
| F  | 5.6069737  | -2.7003817 | 0.6803214  |
| Br | -1.5131563 | 0.8200383  | -2.6435846 |
| H  | -0.2453293 | 1.4709933  | -0.6451456 |
| C  | 1.6121017  | 2.0895643  | -1.3449476 |
| C  | 2.6218207  | 3.1827123  | -0.9461026 |
| H  | 1.9760357  | 1.0653703  | -1.1986996 |
| H  | 1.2398857  | 2.1677913  | -2.3728786 |
| H  | 3.4853187  | 2.7469943  | -0.4262886 |
| H  | 3.0024207  | 3.7016233  | -1.8346976 |
| C  | 0.8280127  | 2.2421263  | 0.9740484  |
| H  | -0.0902073 | 2.1857913  | 1.5694414  |
| H  | 1.3833837  | 1.3084913  | 1.1258244  |
| C  | 1.6697867  | 3.5123273  | 1.2129124  |
| H  | 1.1263867  | 4.2363113  | 1.8345504  |
| H  | 2.6005417  | 3.2638213  | 1.7379564  |
| C  | 0.7741577  | 4.6626743  | -0.6710746 |
| H  | 0.3891937  | 5.4987703  | -0.0736306 |
| H  | 1.0289087  | 5.0595723  | -1.6623106 |
| C  | -0.2791223 | 3.5420553  | -0.7817696 |
| H  | -1.1009513 | 3.6396253  | -0.0612826 |
| H  | -0.7183483 | 3.4140803  | -1.7774396 |
| N  | 2.0006707  | 4.1622503  | -0.0539566 |
| N  | 0.4157987  | 2.2589353  | -0.4593276 |

**a4**

|    |            |            |            |
|----|------------|------------|------------|
| Ni | -1.1829815 | -0.7990127 | 0.2069404  |
| Br | -1.5137835 | 0.6725963  | -2.0209326 |
| C  | 2.6516905  | -2.4071197 | -0.8664316 |
| C  | 3.4506165  | -2.0702767 | 0.2238234  |
| C  | 2.8719285  | -1.4711697 | 1.3432184  |
| C  | 1.5087335  | -1.1927027 | 1.3489084  |
| C  | 0.6758215  | -1.4683067 | 0.2474914  |
| C  | 1.2913355  | -2.1084937 | -0.8426136 |
| H  | 3.1004815  | -2.8863347 | -1.7356466 |
| H  | 3.4947805  | -1.2289007 | 2.2051294  |
| H  | 1.0783255  | -0.7200217 | 2.2369554  |
| H  | 0.7012255  | -2.3467967 | -1.7328086 |
| C  | 4.9294415  | -2.2487127 | 0.1742104  |
| F  | 5.5516085  | -1.0953437 | -0.1576636 |
| F  | 5.4390495  | -2.6167427 | 1.3571864  |
| F  | 5.3098935  | -3.1589017 | -0.7290306 |
| C  | -2.2337745 | -3.4462297 | -0.8213366 |
| C  | -3.9282395 | -1.8241447 | -0.7014596 |
| C  | -3.6975485 | -2.1080717 | -2.1937926 |
| C  | -2.4173375 | -2.9599367 | -2.2496816 |
| H  | -1.1976555 | -3.6950967 | -0.5588026 |
| H  | -2.8698725 | -4.3275967 | -0.6239556 |
| H  | -4.7967355 | -2.3883447 | -0.3232626 |
| H  | -4.0876365 | -0.7606887 | -0.4832226 |
| H  | -4.5574315 | -2.6395017 | -2.6191386 |
| H  | -3.5637005 | -1.1758787 | -2.7532236 |
| H  | -2.4790775 | -3.7874547 | -2.9651976 |
| H  | -1.5684235 | -2.3241677 | -2.5375606 |
| N  | -2.6907355 | -2.2869797 | -0.0340196 |
| H  | -2.8728545 | -2.5463817 | 0.9328744  |
| C  | -2.1875045 | -0.1731227 | 2.8205504  |
| C  | -2.3589175 | 1.6092653  | 1.4068504  |
| C  | -3.8029375 | 1.3746353  | 1.8839174  |
| C  | -3.6884975 | 0.1720963  | 2.8450804  |
| H  | -1.9737755 | -1.2478107 | 2.9299794  |
| H  | -1.6766725 | 0.3359353  | 3.6647504  |
| H  | -1.8772665 | 2.3703413  | 2.0606474  |
| H  | -2.2967125 | 1.9601593  | 0.3680374  |
| H  | -4.2369635 | 2.2609223  | 2.3642204  |
| H  | -4.4413555 | 1.1294623  | 1.0239614  |

|   |            |            |            |
|---|------------|------------|------------|
| H | -4.0499205 | 0.3981423  | 3.8565084  |
| H | -4.2829945 | -0.6764037 | 2.4765324  |
| N | -1.7007915 | 0.3294773  | 1.5556134  |
| H | 0.1722645  | 1.5855923  | -1.3203266 |
| C | 2.2291265  | 1.2026763  | -1.3308036 |
| C | 3.5042045  | 1.9843233  | -0.9671206 |
| H | 2.1141745  | 0.2760403  | -0.7622526 |
| H | 2.1344895  | 0.9603793  | -2.3967856 |
| H | 4.1991295  | 1.3358493  | -0.4187886 |
| H | 4.0271105  | 2.3440813  | -1.8632946 |
| C | 0.9680905  | 2.2342383  | 0.5107894  |
| H | 0.1760885  | 2.9739533  | 0.6861044  |
| H | 0.6266865  | 1.2803183  | 0.9339084  |
| C | 2.3525285  | 2.7023393  | 0.9911814  |
| H | 2.2582305  | 3.5251203  | 1.7113864  |
| H | 2.8859385  | 1.8821133  | 1.4906044  |
| C | 2.4008695  | 4.0944633  | -0.9469576 |
| H | 2.0658985  | 4.9075273  | -0.2894206 |
| H | 3.0606945  | 4.5366833  | -1.7039726 |
| C | 1.1955335  | 3.3957583  | -1.6175646 |
| H | 0.2434665  | 3.9244213  | -1.4848436 |
| H | 1.3349485  | 3.2190373  | -2.6915166 |
| N | 3.1668725  | 3.1454663  | -0.1426686 |
| N | 1.0608175  | 2.0632293  | -0.9712636 |

**a5**

|   |            |           |            |
|---|------------|-----------|------------|
| C | -1.2797520 | 2.7991488 | 1.7840756  |
| C | 0.1634290  | 4.0224598 | 0.3051546  |
| C | -0.7226440 | 4.9787858 | 1.0899636  |
| C | -1.9349830 | 4.1040328 | 1.3830286  |
| H | -1.9370580 | 1.9288148 | 1.7424036  |
| H | -0.8729450 | 2.8699088 | 2.8020226  |
| H | 1.2395480  | 4.2240968 | 0.3830796  |
| H | -0.1073550 | 4.0568238 | -0.7585674 |
| H | -0.2395380 | 5.2774168 | 2.0317956  |
| H | -0.9508720 | 5.8891708 | 0.5238536  |
| H | -2.5920110 | 4.5009038 | 2.1645166  |
| H | -2.5353920 | 3.9589798 | 0.4712386  |
| N | -0.1396410 | 2.6480428 | 0.8256046  |
| H | 0.6597250  | 2.2888998 | 1.3524736  |
| C | 2.9302570  | 1.4432208 | -0.6560814 |
| C | 1.9909700  | 2.6977798 | -2.4137814 |

|    |            |            |            |
|----|------------|------------|------------|
| C  | 3.5123300  | 2.7340498  | -2.5505784 |
| C  | 3.9250240  | 1.4660618  | -1.8103254 |
| H  | 3.2596940  | 2.1109178  | 0.1646806  |
| H  | 2.7519370  | 0.4692338  | -0.1866034 |
| H  | 1.5187530  | 2.1363658  | -3.2387364 |
| H  | 1.5082510  | 3.6872178  | -2.3953714 |
| H  | 3.8422200  | 2.7645028  | -3.5946594 |
| H  | 3.9235290  | 3.6192208  | -2.0432734 |
| H  | 3.7619500  | 0.5844008  | -2.4483834 |
| H  | 4.9695080  | 1.4637688  | -1.4800054 |
| N  | 1.6953930  | 1.9747338  | -1.1918114 |
| Ni | -0.0814740 | 1.3759258  | -0.7022124 |
| C  | -4.4399980 | -0.1999432 | 0.0165676  |
| C  | -3.4043900 | -0.6720102 | 0.8152416  |
| C  | -2.1046100 | -0.2141042 | 0.6084916  |
| C  | -1.8170690 | 0.7162378  | -0.3958354 |
| C  | -2.8725060 | 1.1745038  | -1.1937714 |
| C  | -4.1721170 | 0.7309008  | -0.9873794 |
| H  | -3.6171920 | -1.3858852 | 1.6096746  |
| H  | -1.3135310 | -0.5490742 | 1.2817066  |
| H  | -2.6715850 | 1.8770398  | -2.0046534 |
| H  | -4.9889880 | 1.0974648  | -1.6097864 |
| C  | -5.8442650 | -0.6704472 | 0.1916066  |
| F  | -6.2890910 | -1.3222912 | -0.8961784 |
| F  | -6.6906450 | 0.3539848  | 0.3831656  |
| F  | -5.9847300 | -1.5014962 | 1.2321916  |
| Br | 0.0654300  | -0.1370832 | -2.4651674 |
| H  | 0.5124640  | -2.0304302 | 0.9009426  |
| C  | -0.5675340 | -3.1142712 | -0.5287504 |
| C  | -0.1993100 | -4.2534722 | -1.4975694 |
| H  | -1.3936500 | -3.3629942 | 0.1484626  |
| H  | -0.7938670 | -2.1695572 | -1.0390704 |
| H  | -1.0025450 | -4.9991382 | -1.5446804 |
| H  | -0.0554630 | -3.8559052 | -2.5112154 |
| C  | 0.8683120  | -4.0526362 | 1.2280956  |
| H  | 1.7915280  | -3.8461752 | 1.7811906  |
| H  | 0.0453880  | -4.0810402 | 1.9501056  |
| C  | 0.9426610  | -5.2972072 | 0.3190156  |
| H  | 1.8107600  | -5.9141932 | 0.5826586  |
| H  | 0.0486660  | -5.9231642 | 0.4377456  |
| C  | 2.1535380  | -3.9734672 | -1.2460934 |
| H  | 3.0601680  | -4.4494212 | -0.8495764 |



|   |           |            |            |
|---|-----------|------------|------------|
| H | 2.3161260 | -3.7957832 | -2.3164824 |
| C | 1.8537200 | -2.6474572 | -0.5246294 |
| H | 2.6448900 | -2.3048082 | 0.1504676  |
| H | 1.5865930 | -1.8310902 | -1.2086234 |
| N | 1.0417900 | -4.9094192 | -1.0852644 |
| N | 0.6394180 | -2.8807142 | 0.3308296  |
| P | 1.5286480 | -0.2297772 | 2.6717216  |
| F | 0.7255520 | -1.6419242 | 2.9037416  |
| F | 0.9811890 | -0.2809472 | 1.0889916  |
| F | 0.1930260 | 0.5841158  | 3.0671926  |
| F | 2.0594730 | -0.2178732 | 4.1683426  |
| F | 2.8241760 | -1.0671622 | 2.1651816  |
| F | 2.2707140 | 1.1732328  | 2.3178966  |

**TSa3**

|   |            |            |            |
|---|------------|------------|------------|
| C | 0.9841558  | 3.0236152  | -1.4167242 |
| C | 0.3032668  | 3.0640282  | 0.8833398  |
| C | 0.3429958  | 4.4958382  | 0.3753428  |
| C | 1.3171868  | 4.3842232  | -0.7953452 |
| H | 1.8696168  | 2.4708952  | -1.7546342 |
| H | 0.3054648  | 3.1129792  | -2.2736682 |
| H | -0.5759342 | 2.8164312  | 1.4882738  |
| H | 1.2084188  | 2.8289912  | 1.4647068  |
| H | -0.6590462 | 4.7776262  | 0.0226708  |
| H | 0.6550518  | 5.2191472  | 1.1375988  |
| H | 1.2260308  | 5.2028562  | -1.5176512 |
| H | 2.3527688  | 4.3922572  | -0.4225072 |
| N | 0.2786968  | 2.2485312  | -0.3502882 |
| H | -0.7030672 | 2.2129252  | -0.6317762 |
| C | 1.1417508  | -1.8611948 | 1.5231238  |
| C | 1.4728138  | 0.2496592  | 2.5428888  |
| C | 1.8945948  | -0.8650578 | 3.5093958  |
| C | 2.2238548  | -2.0260198 | 2.5776718  |
| H | 0.1828928  | -2.2664468 | 1.9053538  |
| H | 1.3412798  | -2.3787118 | 0.5750498  |
| H | 2.3285138  | 0.9078782  | 2.3301228  |
| H | 0.6757258  | 0.8874022  | 2.9526448  |
| H | 2.7301748  | -0.5650678 | 4.1515668  |
| H | 1.0552818  | -1.1400578 | 4.1642678  |
| H | 3.2143698  | -1.8869608 | 2.1186958  |
| H | 2.2066008  | -3.0041378 | 3.0724298  |
| N | 1.0043118  | -0.4187978 | 1.3283568  |

|    |            |            |            |
|----|------------|------------|------------|
| Ni | 0.6067898  | 0.2558662  | -0.3649502 |
| C  | 5.2154578  | -0.0787298 | -0.8502532 |
| C  | 4.3804088  | -1.1411418 | -1.1972312 |
| C  | 3.0339598  | -1.1090478 | -0.8613802 |
| C  | 2.5209798  | -0.0071168 | -0.1770662 |
| C  | 3.3489408  | 1.0555742  | 0.1596408  |
| C  | 4.6987868  | 1.0231832  | -0.1816162 |
| H  | 4.7856898  | -1.9914058 | -1.7451812 |
| H  | 2.3854838  | -1.9268348 | -1.1742082 |
| H  | 2.9540388  | 1.9307512  | 0.6748538  |
| H  | 5.3468728  | 1.8586372  | 0.0732948  |
| C  | 6.6624458  | -0.1710318 | -1.2099622 |
| F  | 7.2534898  | -1.2034148 | -0.5873952 |
| F  | 7.3427428  | 0.9318592  | -0.8864362 |
| F  | 6.8284968  | -0.3771938 | -2.5241382 |
| Br | -0.2227672 | -0.3225668 | -2.4877472 |
| H  | -2.8119792 | -0.3750458 | -0.9845332 |
| C  | -3.3959542 | -2.0172318 | -2.1206582 |
| C  | -3.7227132 | -3.4904298 | -1.8044452 |
| H  | -4.2224272 | -1.4742328 | -2.5934882 |
| H  | -2.4935422 | -1.8718348 | -2.7254522 |
| H  | -4.6203022 | -3.8132588 | -2.3463312 |
| H  | -2.9000332 | -4.1480848 | -2.1138172 |
| C  | -4.4035102 | -1.2766358 | -0.0095222 |
| H  | -4.1390792 | -0.8274268 | 0.9532598  |
| H  | -5.0724692 | -0.5784628 | -0.5183212 |
| C  | -4.9389472 | -2.7173958 | 0.0934658  |
| H  | -5.2097942 | -2.9562488 | 1.1294598  |
| H  | -5.8426572 | -2.8453978 | -0.5164412 |
| C  | -2.6872932 | -3.4451188 | 0.3430908  |
| H  | -2.8937362 | -3.4988948 | 1.4202588  |
| H  | -1.9823492 | -4.2518968 | 0.1045078  |
| C  | -2.0906742 | -2.0792738 | -0.0436252 |
| H  | -1.8175222 | -1.4429028 | 0.8073348  |
| H  | -1.2232332 | -2.1433668 | -0.7114232 |
| N  | -3.9408042 | -3.6796928 | -0.3707722 |
| N  | -3.1400082 | -1.3405758 | -0.8118242 |
| P  | -3.4531882 | 2.2770042  | -0.3967802 |
| F  | -3.9407422 | 1.1872562  | -1.5324912 |
| F  | -2.3587112 | 1.1131842  | 0.1283938  |
| F  | -2.3194162 | 2.8002192  | -1.4433602 |
| F  | -4.4975642 | 3.3539132  | -0.9260932 |

|   |            |           |           |
|---|------------|-----------|-----------|
| F | -4.5268252 | 1.6617042 | 0.6385508 |
| F | -2.8741132 | 3.2699102 | 0.7299258 |

**a6(b1)**

|    |            |            |            |
|----|------------|------------|------------|
| Ni | -0.0803406 | 1.0554085  | 0.0249876  |
| C  | 3.1169364  | 0.6309595  | -0.7085144 |
| C  | 2.5958474  | -0.8083755 | -0.9242474 |
| C  | 1.9384254  | -1.1782175 | 0.4052896  |
| C  | 2.7190154  | 0.9778385  | 0.7243096  |
| H  | 4.1991304  | 0.7149215  | -0.8573614 |
| H  | 2.6304754  | 1.3256215  | -1.4041714 |
| H  | 3.3891474  | -1.5169005 | -1.1882364 |
| H  | 1.8577014  | -0.8283935 | -1.7368074 |
| H  | 1.0760184  | -1.8509245 | 0.3100156  |
| H  | 2.6696474  | -1.6638705 | 1.0751866  |
| H  | 2.4533114  | 2.0312775  | 0.8637196  |
| H  | 3.5188854  | 0.7014305  | 1.4335606  |
| N  | 1.5280594  | 0.1274145  | 0.9436196  |
| H  | 1.2999264  | 0.0737745  | 1.9361226  |
| C  | -3.2690926 | 0.6859695  | -0.3082674 |
| C  | -2.9680856 | -0.0061285 | 1.0403536  |
| C  | -1.9413386 | -1.0848805 | 0.6998456  |
| C  | -2.3723166 | -0.0269775 | -1.3203054 |
| H  | -4.3241396 | 0.6135565  | -0.5948934 |
| H  | -3.0072116 | 1.7496695  | -0.2576754 |
| H  | -3.8600996 | -0.4386895 | 1.5074676  |
| H  | -2.5383946 | 0.7154325  | 1.7463806  |
| H  | -1.2197656 | -1.2795085 | 1.5031636  |
| H  | -2.4424346 | -2.0353015 | 0.4442126  |
| H  | -1.9850706 | 0.6323005  | -2.1055864 |
| H  | -2.9032456 | -0.8716305 | -1.7929944 |
| N  | -1.2565706 | -0.5303875 | -0.4855754 |
| H  | -0.7325816 | -1.2506365 | -0.9825504 |
| Br | -0.0918386 | 3.3352465  | 0.0089506  |

**a7**

|   |           |           |            |
|---|-----------|-----------|------------|
| C | 2.7370454 | 2.3375790 | -0.8255943 |
| C | 2.2602974 | 2.0059260 | 1.5148267  |
| C | 3.3840134 | 3.0183000 | 1.3611877  |
| C | 3.9747884 | 2.6163870 | 0.0144837  |
| H | 2.9146094 | 1.6124940 | -1.6249053 |
| H | 2.3504314 | 3.2636980 | -1.2756573 |

|    |            |            |            |
|----|------------|------------|------------|
| H  | 1.4515974  | 2.3098420  | 2.1905367  |
| H  | 2.6594204  | 1.0487960  | 1.8681437  |
| H  | 2.9858214  | 4.0439160  | 1.3161067  |
| H  | 4.1032654  | 2.9722260  | 2.1863487  |
| H  | 4.6164684  | 3.3827810  | -0.4339403 |
| H  | 4.5669054  | 1.6957430  | 0.1200587  |
| N  | 1.7126014  | 1.8067060  | 0.1370427  |
| H  | 0.8910134  | 2.4013370  | 0.0532157  |
| C  | -1.1131716 | 1.3156280  | -1.7263643 |
| C  | -1.4965646 | 1.7364150  | 0.5831617  |
| C  | -2.2652006 | 2.7705140  | -0.2562513 |
| C  | -2.4098156 | 2.1027360  | -1.6222653 |
| H  | -0.2729336 | 1.9818040  | -1.9891113 |
| H  | -1.1189106 | 0.4907760  | -2.4487183 |
| H  | -2.1575016 | 1.1782800  | 1.2577367  |
| H  | -0.7235076 | 2.2030850  | 1.2113247  |
| H  | -3.2253286 | 3.0446230  | 0.1965687  |
| H  | -1.6788796 | 3.6970690  | -0.3553113 |
| H  | -3.2601766 | 1.4051370  | -1.6193843 |
| H  | -2.5555036 | 2.8165370  | -2.4412883 |
| N  | -0.8978276 | 0.7660160  | -0.3700523 |
| Ni | 1.0003984  | -0.0038880 | -0.2164703 |
| C  | 5.3640914  | -1.7017660 | -0.0913053 |
| C  | 4.8009164  | -1.3013770 | -1.3017823 |
| C  | 3.4874894  | -0.8474040 | -1.3379453 |
| C  | 2.7187654  | -0.7550630 | -0.1722103 |
| C  | 3.2862674  | -1.2077790 | 1.0234327  |
| C  | 4.5990484  | -1.6656580 | 1.0717717  |
| H  | 5.3891804  | -1.3620920 | -2.2164983 |
| H  | 3.0471884  | -0.5778440 | -2.3006163 |
| H  | 2.6869054  | -1.2242620 | 1.9364597  |
| H  | 5.0288644  | -2.0103030 | 2.0109957  |
| C  | 6.7994734  | -2.1033080 | -0.0369373 |
| F  | 7.0587274  | -2.9300750 | 0.9845497  |
| F  | 7.6074144  | -1.0375470 | 0.1195937  |
| F  | 7.1976914  | -2.7161100 | -1.1602223 |
| Br | 0.1762744  | -2.0995180 | -0.6252913 |
| H  | -1.5004796 | -0.0631920 | -0.3090983 |
| C  | -3.0477756 | -1.7819220 | 1.2338787  |
| C  | -4.1611626 | -2.8269740 | 1.4866177  |
| H  | -2.0834136 | -2.2431030 | 0.9789917  |
| H  | -2.8822556 | -1.1416640 | 2.1145667  |

|   |            |            |            |
|---|------------|------------|------------|
| H | -3.7608726 | -3.8503130 | 1.4746797  |
| H | -4.6455946 | -2.6779430 | 2.4627417  |
| C | -3.5493486 | -1.7431330 | -1.1064303 |
| H | -3.8729676 | -1.0853430 | -1.9285133 |
| H | -2.5456166 | -2.1172140 | -1.3540613 |
| C | -4.5652336 | -2.8843020 | -0.8584783 |
| H | -5.3570236 | -2.8979470 | -1.6213073 |
| H | -4.0744226 | -3.8673930 | -0.8800793 |
| C | -5.8076026 | -1.4014510 | 0.5277227  |
| H | -6.5542366 | -1.3293250 | -0.2764753 |
| H | -6.3478956 | -1.3218700 | 1.4820657  |
| C | -4.7237076 | -0.3007080 | 0.3945827  |
| H | -4.9625466 | 0.4103470  | -0.4123223 |
| H | -4.6216556 | 0.2826090  | 1.3233407  |
| N | -5.1936386 | -2.7251100 | 0.4539027  |
| N | -3.4242056 | -0.9144080 | 0.1042517  |

**TSa2'**

|   |            |           |            |
|---|------------|-----------|------------|
| C | -1.7764273 | 1.9760008 | 1.5987773  |
| C | -1.9181723 | 2.9531928 | -0.6000787 |
| C | -2.8438753 | 3.7006798 | 0.3475123  |
| C | -3.1367573 | 2.6305258 | 1.3938053  |
| H | -1.8524993 | 0.9290608 | 1.9058193  |
| H | -1.1824113 | 2.5178358 | 2.3499423  |
| H | -1.2614323 | 3.5865978 | -1.2086997 |
| H | -2.5006243 | 2.3161528 | -1.2748637 |
| H | -2.3255553 | 4.5561948 | 0.8076643  |
| H | -3.7412303 | 4.0796888 | -0.1543967 |
| H | -3.5546783 | 3.0254018 | 2.3266413  |
| H | -3.8450983 | 1.8926818 | 0.9889183  |
| N | -1.0820863 | 2.0818088 | 0.2778893  |
| H | -0.1970053 | 2.5599078 | 0.4262933  |
| C | 1.9947627  | 1.7520958 | 0.6062833  |
| C | 1.8707437  | 1.7830758 | -1.7446467 |
| C | 2.4675987  | 3.1050998 | -1.2682137 |
| C | 3.0688977  | 2.7024358 | 0.0691573  |
| H | 1.2787017  | 2.3542358 | 1.2282523  |
| H | 2.4289977  | 1.0451738 | 1.3501143  |
| H | 2.6445857  | 1.2061058 | -2.3013667 |
| H | 1.0522197  | 1.9369018 | -2.4662897 |
| H | 3.1868447  | 3.5497338 | -1.9683867 |
| H | 1.6633957  | 3.8431098 | -1.1029017 |

|    |            |            |            |
|----|------------|------------|------------|
| H  | 4.0122347  | 2.1565058  | -0.0989097 |
| H  | 3.2885097  | 3.5403918  | 0.7434453  |
| N  | 1.4179257  | 1.0784828  | -0.5398877 |
| Ni | -0.4582023 | 0.4859308  | -0.6573427 |
| C  | -4.7681933 | -1.4144002 | -0.2669907 |
| C  | -3.7853973 | -1.6412702 | 0.6897023  |
| C  | -2.5204843 | -1.0814092 | 0.5212483  |
| C  | -2.2004033 | -0.2794042 | -0.5815267 |
| C  | -3.2029033 | -0.1022162 | -1.5474807 |
| C  | -4.4696343 | -0.6480862 | -1.3948067 |
| H  | -4.0110293 | -2.2527742 | 1.5618453  |
| H  | -1.7640913 | -1.2779222 | 1.2890533  |
| H  | -2.9805073 | 0.4649008  | -2.4548567 |
| H  | -5.2379053 | -0.4925112 | -2.1532747 |
| C  | -6.1391103 | -1.9831292 | -0.1358927 |
| F  | -6.4379673 | -2.8110832 | -1.1505687 |
| F  | -7.0804063 | -1.0225412 | -0.1533287 |
| F  | -6.3062153 | -2.6751902 | 0.9989453  |
| Br | 0.0250907  | -1.0866982 | -2.3620227 |
| H  | 1.5948667  | -1.4544242 | -1.1071227 |
| C  | 2.4405257  | -3.3491762 | -0.8457027 |
| C  | 3.4915247  | -3.9633432 | 0.1075743  |
| H  | 1.4539817  | -3.8239792 | -0.7822547 |
| H  | 2.7430777  | -3.3523872 | -1.8997547 |
| H  | 3.1185387  | -4.8967492 | 0.5474183  |
| H  | 4.4172737  | -4.2035542 | -0.4312517 |
| C  | 1.6571577  | -1.8699192 | 0.9221313  |
| H  | 1.5352747  | -0.8065402 | 1.1527333  |
| H  | 0.6541777  | -2.3071872 | 0.8331383  |
| C  | 2.5941917  | -2.6389252 | 1.8754363  |
| H  | 2.8629437  | -2.0190372 | 2.7403253  |
| H  | 2.1112657  | -3.5464292 | 2.2608873  |
| C  | 4.4605117  | -1.8439502 | 0.6240423  |
| H  | 4.6289887  | -1.1308822 | 1.4422103  |
| H  | 5.4444967  | -2.1246152 | 0.2270033  |
| C  | 3.5770317  | -1.2213082 | -0.4742447 |
| H  | 3.3288507  | -0.1613962 | -0.3491747 |
| H  | 3.9760767  | -1.3630412 | -1.4870237 |
| N  | 3.8217807  | -3.0342582 | 1.1860813  |
| N  | 2.2672587  | -1.9301702 | -0.4370297 |

**a8**

|    |            |            |            |
|----|------------|------------|------------|
| C  | 1.7300336  | 1.9764979  | -1.6107064 |
| C  | 1.8870686  | 2.9929129  | 0.5696326  |
| C  | 2.8005866  | 3.7274629  | -0.3998494 |
| C  | 3.0891216  | 2.6402609  | -1.4296234 |
| H  | 1.8078616  | 0.9249519  | -1.9014214 |
| H  | 1.1258356  | 2.5034779  | -2.3642424 |
| H  | 1.2322436  | 3.6342339  | 1.1719346  |
| H  | 2.4790416  | 2.3716549  | 1.2508996  |
| H  | 2.2740026  | 4.5721949  | -0.8703024 |
| H  | 3.7005946  | 4.1194999  | 0.0870786  |
| H  | 3.4967946  | 3.0204749  | -2.3730214 |
| H  | 3.8044866  | 1.9128059  | -1.0183064 |
| N  | 1.0482916  | 2.1009319  | -0.2848534 |
| H  | 0.1578886  | 2.5697979  | -0.4327144 |
| C  | -2.0225344 | 1.7304349  | -0.5883114 |
| C  | -1.8555554 | 1.8798829  | 1.7566836  |
| C  | -2.6239224 | 3.0932479  | 1.2309926  |
| C  | -3.1986174 | 2.5600959  | -0.0731504 |
| H  | -1.3648604 | 2.4181059  | -1.1924164 |
| H  | -2.3486044 | 0.9715109  | -1.3328144 |
| H  | -2.5130534 | 1.2675099  | 2.4120666  |
| H  | -1.0092554 | 2.1800379  | 2.4001786  |
| H  | -3.3767874 | 3.4793679  | 1.9301276  |
| H  | -1.9246114 | 3.9174179  | 1.0087596  |
| H  | -4.0605694 | 1.9048439  | 0.1375956  |
| H  | -3.5318054 | 3.3366079  | -0.7739834 |
| N  | -1.4185834 | 1.1261979  | 0.5771996  |
| Ni | 0.4453276  | 0.5184949  | 0.6840476  |
| C  | 4.7616186  | -1.3680791 | 0.2819596  |
| C  | 3.7711866  | -1.6156571 | -0.6615874 |
| C  | 2.5050506  | -1.0593171 | -0.4906164 |
| C  | 2.1907806  | -0.2408391 | 0.6016826  |
| C  | 3.2016196  | -0.0422701 | 1.5547736  |
| C  | 4.4696726  | -0.5843551 | 1.3995136  |
| H  | 3.9921216  | -2.2399981 | -1.5258324 |
| H  | 1.7430416  | -1.2714791 | -1.2487324 |
| H  | 2.9853816  | 0.5391669  | 2.4546336  |
| H  | 5.2443156  | -0.4115621 | 2.1476766  |
| C  | 6.1327316  | -1.9361881 | 0.1497366  |
| F  | 6.4330346  | -2.7634711 | 1.1645936  |
| F  | 7.0734606  | -0.9752611 | 0.1654096  |
| F  | 6.2985936  | -2.6293451 | -0.9846734 |

|    |            |            |            |
|----|------------|------------|------------|
| Br | -0.0171334 | -1.0403861 | 2.4114206  |
| H  | -1.4376624 | -1.8403441 | 1.2252926  |
| C  | -2.4565244 | -3.6101981 | 0.6837096  |
| C  | -3.5040644 | -3.9810891 | -0.3942324 |
| H  | -1.5136604 | -4.1630611 | 0.5889376  |
| H  | -2.8203424 | -3.7383781 | 1.7104156  |
| H  | -3.1388374 | -4.8008491 | -1.0258534 |
| H  | -4.4392464 | -4.3183491 | 0.0705756  |
| C  | -1.5347104 | -1.9385061 | -0.8390124 |
| H  | -1.2683304 | -0.8733831 | -0.8608714 |
| H  | -0.6029544 | -2.5185641 | -0.8658124 |
| C  | -2.5738134 | -2.3748141 | -1.8923994 |
| H  | -2.8251874 | -1.5411931 | -2.5608104 |
| H  | -2.1855484 | -3.1896161 | -2.5174124 |
| C  | -4.3601044 | -1.7522361 | -0.4364394 |
| H  | -4.5842134 | -0.9070251 | -1.1005894 |
| H  | -5.3130594 | -2.0944011 | -0.0121164 |
| C  | -3.3721364 | -1.3353141 | 0.6711936  |
| H  | -2.9947244 | -0.2985411 | 0.6245496  |
| H  | -3.7425204 | -1.5290551 | 1.6859876  |
| N  | -3.8027484 | -2.8355741 | -1.2481144 |
| N  | -2.1455054 | -2.1713801 | 0.5015616  |

**b2**

|    |            |            |            |
|----|------------|------------|------------|
| Ni | -0.9801505 | -0.7837230 | -0.5907739 |
| Br | -0.6363925 | -2.7503470 | -1.7589259 |
| N  | -0.5445315 | 1.1970840  | -0.7779759 |
| H  | 0.4122345  | 1.2845870  | -0.3992089 |
| C  | -0.5541925 | 1.4597240  | -2.2351099 |
| H  | -0.0778695 | 0.6364630  | -2.7823779 |
| H  | -0.0026275 | 2.3915730  | -2.4544509 |
| C  | -2.0400835 | 1.6168280  | -2.5400829 |
| H  | -2.4753165 | 0.6309350  | -2.7531699 |
| H  | -2.2145375 | 2.2528620  | -3.4150739 |
| C  | -2.6332805 | 2.2027000  | -1.2395409 |
| H  | -3.4437105 | 1.5645760  | -0.8632429 |
| H  | -3.0522155 | 3.2059260  | -1.3795509 |
| C  | -1.4579035 | 2.2266500  | -0.2582769 |
| H  | -1.7390635 | 2.0119660  | 0.7796051  |
| H  | -0.9643145 | 3.2145330  | -0.2773689 |
| N  | -1.7612505 | -1.4491300 | 1.2126521  |
| H  | -1.0207255 | -2.0621980 | 1.5546181  |



|   |            |            |            |
|---|------------|------------|------------|
| C | -2.1573685 | -0.4485130 | 2.2169171  |
| H | -1.4267195 | 0.3714620  | 2.2390601  |
| H | -2.1898505 | -0.8981660 | 3.2241021  |
| C | -3.5699085 | -0.0243950 | 1.7780741  |
| H | -3.5735255 | 0.9729360  | 1.3203911  |
| H | -4.2402365 | 0.0245110  | 2.6443631  |
| C | -4.0140445 | -1.1063580 | 0.7716161  |
| H | -3.9375455 | -0.7379560 | -0.2620699 |
| H | -5.0444005 | -1.4422590 | 0.9318161  |
| C | -2.9969905 | -2.2180550 | 0.9640831  |
| H | -2.8572695 | -2.8678470 | 0.0938841  |
| H | -3.2519365 | -2.8331180 | 1.8452571  |
| C | 3.5661285  | 1.1446590  | 0.3673991  |
| C | 4.6519075  | 0.0640810  | 0.6086391  |
| H | 3.8451865  | 1.8257340  | -0.4497219 |
| H | 3.3956755  | 1.7600090  | 1.2628351  |
| H | 5.5567835  | 0.2632590  | 0.0168881  |
| H | 4.9552675  | 0.0300220  | 1.6652811  |
| C | 2.4912155  | -0.2252440 | -1.2689819 |
| H | 1.5550445  | -0.7585890 | -1.4967489 |
| H | 2.6613965  | 0.5170550  | -2.0636509 |
| C | 3.6703775  | -1.2176380 | -1.1396989 |
| H | 3.3646305  | -2.2313590 | -1.4341069 |
| H | 4.5183245  | -0.9293840 | -1.7777859 |
| C | 3.0151795  | -1.5873460 | 1.1149861  |
| H | 2.5985345  | -2.5478580 | 0.7779391  |
| H | 3.3923125  | -1.7288210 | 2.1383631  |
| C | 1.9482435  | -0.4695640 | 1.0471341  |
| H | 0.9530625  | -0.8777890 | 0.8006851  |
| H | 1.8633555  | 0.0814870  | 1.9968271  |
| N | 4.1437965  | -1.2573610 | 0.2449751  |
| N | 2.2993045  | 0.5013950  | -0.0004939 |

### **TSb1**

|    |            |            |           |
|----|------------|------------|-----------|
| Ni | 1.3728611  | 0.5077186  | 0.2885060 |
| C  | 0.9080371  | -1.5131154 | 3.3281360 |
| C  | -0.5869929 | -1.1919414 | 3.1577820 |
| C  | -0.6334709 | 0.2554406  | 2.6423940 |
| C  | 1.5869361  | -0.1542334 | 3.2676030 |
| H  | 1.1300991  | -2.0471554 | 4.2584590 |
| H  | 1.2428891  | -2.1403594 | 2.4915950 |
| H  | -1.1310169 | -1.2781744 | 4.1060920 |

|    |            |            |            |
|----|------------|------------|------------|
| H  | -1.0578259 | -1.8867144 | 2.4518910  |
| H  | -1.2812249 | 0.3830466  | 1.7638850  |
| H  | -0.9970989 | 0.9353816  | 3.4295610  |
| H  | 2.6316671  | -0.1664954 | 2.9354540  |
| H  | 1.5488781  | 0.3391926  | 4.2541480  |
| N  | 0.7622101  | 0.5867976  | 2.2961120  |
| H  | 0.9514621  | 1.5859386  | 2.3858750  |
| C  | 0.6551981  | 3.0057836  | -2.0743750 |
| C  | 0.2154011  | 3.8472136  | -0.8619990 |
| C  | -0.6336949 | 2.8947476  | -0.0056200 |
| C  | -0.2145209 | 1.7625416  | -1.9836660 |
| H  | 0.5338311  | 3.5270386  | -3.0307420 |
| H  | 1.7126221  | 2.7283126  | -1.9670520 |
| H  | -0.3688319 | 4.7262396  | -1.1594860 |
| H  | 1.0925171  | 4.1892476  | -0.3027770 |
| H  | -0.3887969 | 2.9484316  | 1.0632620  |
| H  | -1.7097239 | 3.1241016  | -0.1136780 |
| H  | 0.2043201  | 0.8707396  | -2.4716140 |
| H  | -1.2068789 | 1.9554946  | -2.4375380 |
| N  | -0.3487089 | 1.5484056  | -0.5329180 |
| H  | -1.1304159 | 0.9038066  | -0.3570910 |
| Br | 2.9466661  | 2.2646876  | 0.7123370  |
| C  | 5.3889781  | -1.0329624 | -0.7934370 |
| C  | 4.9059211  | -1.5504094 | 0.4112150  |
| C  | 3.5514941  | -1.5337614 | 0.6881790  |
| C  | 2.6885871  | -0.9363394 | -0.2333660 |
| C  | 3.1439881  | -0.5081584 | -1.4837020 |
| C  | 4.5090111  | -0.5207064 | -1.7393120 |
| H  | 5.6047391  | -1.9688744 | 1.1345220  |
| H  | 3.1697331  | -1.9440174 | 1.6202950  |
| H  | 2.4520561  | -0.0883724 | -2.2132920 |
| H  | 4.8883261  | -0.1342744 | -2.6821910 |
| C  | 6.8578301  | -1.1049914 | -1.0540920 |
| F  | 7.2683151  | -2.3772764 | -1.1868250 |
| F  | 7.5624061  | -0.5859564 | -0.0401970 |
| F  | 7.2111091  | -0.4564204 | -2.1676370 |
| Br | 0.6502931  | -1.7163074 | -0.2850960 |
| C  | -3.0578219 | -1.4198744 | 0.3676770  |
| C  | -4.3428389 | -2.1724224 | -0.0576300 |
| H  | -2.1638789 | -2.0613824 | 0.3344970  |
| H  | -3.1382889 | -1.0249934 | 1.3922000  |
| H  | -4.1277969 | -3.2150074 | -0.3310260 |

|   |            |            |            |
|---|------------|------------|------------|
| H | -5.0846099 | -2.1946524 | 0.7532930  |
| C | -2.6906229 | -0.7988744 | -1.9076300 |
| H | -2.4771309 | 0.0542706  | -2.5686940 |
| H | -1.8086349 | -1.4556714 | -1.9328450 |
| C | -3.9921469 | -1.5301764 | -2.3197890 |
| H | -4.4662729 | -1.0512824 | -3.1882320 |
| H | -3.7985449 | -2.5773624 | -2.5913500 |
| C | -5.2599919 | -0.1294914 | -0.8672140 |
| H | -5.7511599 | 0.3387576  | -1.7318270 |
| H | -5.9890139 | -0.1392694 | -0.0445920 |
| C | -3.9645949 | 0.6255456  | -0.4710500 |
| H | -3.7606779 | 1.4701586  | -1.1473200 |
| H | -4.0178659 | 1.0312416  | 0.5511360  |
| N | -2.8176249 | -0.2871444 | -0.5349180 |
| N | -4.9496649 | -1.5156614 | -1.2142830 |

**b3**

|    |            |            |            |
|----|------------|------------|------------|
| Ni | 0.4623893  | 0.9356829  | -0.1771836 |
| Br | -0.4937167 | 0.9395879  | 2.1017354  |
| C  | 4.2075903  | -0.4841551 | -1.0242856 |
| C  | 4.7094593  | -0.9542041 | 0.1824934  |
| C  | 3.9459853  | -0.8630791 | 1.3468974  |
| C  | 2.6734693  | -0.3069231 | 1.3093034  |
| C  | 2.1671183  | 0.1510939  | 0.0969804  |
| C  | 2.9283663  | 0.0729839  | -1.0633636 |
| H  | 4.8067673  | -0.5543471 | -1.9295266 |
| H  | 4.3582223  | -1.2286601 | 2.2873074  |
| H  | 2.0754853  | -0.2215801 | 2.2167274  |
| H  | 2.5358393  | 0.4403099  | -2.0161776 |
| C  | 6.0714123  | -1.5640781 | 0.2800634  |
| F  | 6.8471943  | -0.8889581 | 1.1399884  |
| F  | 6.0083963  | -2.8240131 | 0.7334454  |
| F  | 6.7056133  | -1.5917461 | -0.8961406 |
| C  | 2.5121443  | 4.6904699  | -0.4814296 |
| C  | 2.4855313  | 4.5137449  | 1.0516194  |
| C  | 2.1368833  | 3.0439379  | 1.2546714  |
| C  | 1.9117143  | 3.3904269  | -1.0395336 |
| H  | 1.9238573  | 5.5623849  | -0.7901186 |
| H  | 3.5295133  | 4.8410869  | -0.8603396 |
| H  | 1.7083693  | 5.1476879  | 1.4993624  |
| H  | 3.4340013  | 4.7804779  | 1.5305464  |
| H  | 3.0240193  | 2.4037059  | 1.1641554  |

|    |            |            |            |
|----|------------|------------|------------|
| H  | 1.6231873  | 2.8005349  | 2.1893404  |
| H  | 2.6995193  | 2.7077579  | -1.3853786 |
| H  | 1.1834633  | 3.5197099  | -1.8452046 |
| N  | 1.2464193  | 2.7361019  | 0.1121024  |
| H  | 0.3526213  | 3.2124229  | 0.2735374  |
| C  | -0.2354717 | -1.2279181 | -1.9869626 |
| C  | -0.0050727 | -2.7333701 | -1.9750146 |
| C  | 0.7666543  | -2.9414171 | -0.6771926 |
| C  | 0.0351103  | -2.0122521 | 0.2719704  |
| H  | 0.6124403  | -0.7087151 | -2.4531126 |
| H  | -1.1393887 | -0.9022771 | -2.5116046 |
| H  | -0.9671677 | -3.2664511 | -1.9272456 |
| H  | 0.5242473  | -3.0800521 | -2.8697796 |
| H  | 0.7676423  | -3.9794821 | -0.3263146 |
| H  | 1.8129813  | -2.6210771 | -0.7935656 |
| H  | -0.9030657 | -2.4739451 | 0.6141694  |
| H  | 0.6003373  | -1.7205571 | 1.1591474  |
| N  | -0.3295607 | -0.8196861 | -0.5508696 |
| C  | -4.8513207 | -1.5833171 | 1.7755204  |
| C  | -3.3610427 | -1.5482131 | 1.3612114  |
| H  | -5.0231687 | -1.0152921 | 2.7008124  |
| H  | -5.1960137 | -2.6119821 | 1.9553274  |
| H  | -2.7116377 | -1.1087831 | 2.1317934  |
| H  | -2.9895997 | -2.5631621 | 1.1475034  |
| C  | -5.3254667 | 0.4262509  | 0.6023554  |
| H  | -5.9050207 | 0.8439969  | -0.2338176 |
| H  | -5.6514827 | 0.9462909  | 1.5142704  |
| C  | -3.8060297 | 0.5818479  | 0.3707724  |
| H  | -3.5701487 | 1.2130429  | -0.4946686 |
| H  | -3.2822767 | 1.0206869  | 1.2311424  |
| C  | -3.9207567 | -1.4051001 | -0.9580526 |
| H  | -3.8531517 | -0.7489041 | -1.8387976 |
| H  | -3.3959657 | -2.3437141 | -1.2026006 |
| C  | -5.3916467 | -1.6596511 | -0.5407516 |
| H  | -6.0945297 | -1.2880231 | -1.2998046 |
| H  | -5.5918837 | -2.7330791 | -0.4083326 |
| N  | -5.6801517 | -0.9901151 | 0.7266784  |
| N  | -3.2019637 | -0.7448771 | 0.1382164  |
| H  | -1.3235077 | -0.5947671 | -0.3281856 |
| Br | -1.1937567 | 1.9857019  | -1.5858096 |

**TSb2**

|    |            |            |            |
|----|------------|------------|------------|
| Ni | 0.2972480  | 0.7156549  | -0.0434358 |
| Br | -0.6868820 | 1.0113049  | 2.2325502  |
| C  | 4.0917700  | -0.5141281 | -1.1495728 |
| C  | 4.7203090  | -0.7733471 | 0.0676092  |
| C  | 4.0355140  | -0.5890601 | 1.2636792  |
| C  | 2.7097950  | -0.1577621 | 1.2450682  |
| C  | 2.0806030  | 0.0761469  | 0.0293532  |
| C  | 2.7690280  | -0.0850431 | -1.1695228 |
| H  | 4.6418910  | -0.6503231 | -2.0805508 |
| H  | 4.5347370  | -0.7821321 | 2.2108202  |
| H  | 2.1721650  | -0.0035091 | 2.1816242  |
| H  | 2.2805240  | 0.1282489  | -2.1225898 |
| C  | 6.1457050  | -1.2224671 | 0.0421132  |
| F  | 6.9446930  | -0.2830811 | -0.4865618 |
| F  | 6.6170480  | -1.5068641 | 1.2600552  |
| F  | 6.2997040  | -2.3189561 | -0.7148978 |
| C  | 2.0881760  | 4.5948239  | -0.7200238 |
| C  | 2.2062870  | 4.5410489  | 0.8165102  |
| C  | 1.6889180  | 3.1475679  | 1.2037412  |
| C  | 1.7543600  | 3.1623129  | -1.1190818 |
| H  | 1.2716760  | 5.2651889  | -1.0219478 |
| H  | 2.9990330  | 4.9575169  | -1.2095708 |
| H  | 1.6104490  | 5.3322769  | 1.2875232  |
| H  | 3.2398270  | 4.6780429  | 1.1554362  |
| H  | 2.5157690  | 2.4493299  | 1.3880172  |
| H  | 1.0268890  | 3.1181179  | 2.0721912  |
| H  | 2.6607330  | 2.5443829  | -1.1866778 |
| H  | 1.1853360  | 3.0533669  | -2.0463508 |
| N  | 0.9602730  | 2.6393119  | 0.0161582  |
| H  | 0.0389300  | 3.0862699  | -0.0149058 |
| C  | -0.1037240 | -1.8168461 | -1.3942268 |
| C  | 0.0299540  | -3.2852441 | -1.0131558 |
| C  | 0.7673180  | -3.1870851 | 0.3137222  |
| C  | 0.0535830  | -2.0168061 | 0.9703842  |
| H  | 0.8259180  | -1.4850631 | -1.8806448 |
| H  | -0.9103740 | -1.6020911 | -2.1055718 |
| H  | -0.9625060 | -3.7426231 | -0.8570888 |
| H  | 0.5500820  | -3.8731571 | -1.7786708 |
| H  | 0.7338060  | -4.1024201 | 0.9168602  |
| H  | 1.8240470  | -2.9321121 | 0.1375972  |
| H  | -0.8636210 | -2.3716181 | 1.4744312  |
| H  | 0.6418680  | -1.5167861 | 1.7441472  |

|    |            |            |            |
|----|------------|------------|------------|
| N  | -0.3316330 | -1.0895701 | -0.1232938 |
| C  | -4.9400730 | -1.2929391 | 1.3705782  |
| C  | -3.4070630 | -1.4258541 | 1.2567992  |
| H  | -5.2162620 | -0.6656401 | 2.2282842  |
| H  | -5.4067150 | -2.2755151 | 1.5200252  |
| H  | -2.8583340 | -1.0227021 | 2.1173882  |
| H  | -3.0898490 | -2.4657631 | 1.0965872  |
| C  | -5.0173230 | 0.6982079  | 0.0740312  |
| H  | -5.3624990 | 1.1113079  | -0.8834718 |
| H  | -5.4859920 | 1.2895419  | 0.8714532  |
| C  | -3.4826200 | 0.7540129  | 0.1845152  |
| H  | -3.0001890 | 1.3339569  | -0.6097258 |
| H  | -3.1180580 | 1.1353939  | 1.1442752  |
| C  | -3.5045580 | -1.2682331 | -1.1705068 |
| H  | -3.2074430 | -0.6066611 | -1.9946808 |
| H  | -2.9951620 | -2.2318291 | -1.3062988 |
| C  | -5.0310170 | -1.4179211 | -1.0052788 |
| H  | -5.5557640 | -1.0418331 | -1.8928848 |
| H  | -5.3145510 | -2.4719751 | -0.8802578 |
| N  | -5.4970500 | -0.6813571 | 0.1665762  |
| N  | -2.9606470 | -0.6458781 | 0.0686742  |
| H  | -1.8063180 | -0.7142381 | 0.0076872  |
| Br | -0.8977410 | 1.3131009  | -2.1550158 |

**b4**

|    |            |            |            |
|----|------------|------------|------------|
| Ni | 0.3188140  | 0.6764360  | -0.0648112 |
| Br | -0.6873570 | 0.9170670  | 2.2131958  |
| C  | 4.1479100  | -0.4515160 | -1.1239532 |
| C  | 4.7681980  | -0.7276980 | 0.0936058  |
| C  | 4.0643900  | -0.5929220 | 1.2855128  |
| C  | 2.7290670  | -0.1937730 | 1.2619878  |
| C  | 2.1066440  | 0.0588690  | 0.0461328  |
| C  | 2.8152650  | -0.0548640 | -1.1470402 |
| H  | 4.7119700  | -0.5501790 | -2.0513742 |
| H  | 4.5576600  | -0.7990340 | 2.2330848  |
| H  | 2.1771840  | -0.0774380 | 2.1958338  |
| H  | 2.3331500  | 0.1687170  | -2.1020132 |
| C  | 6.2022800  | -1.1472380 | 0.0727848  |
| F  | 6.9845520  | -0.1912630 | -0.4517692 |
| F  | 6.6752590  | -1.4243580 | 1.2918568  |
| F  | 6.3820650  | -2.2393570 | -0.6854432 |
| C  | 2.0183250  | 4.6045760  | -0.6950132 |

|   |            |            |            |
|---|------------|------------|------------|
| C | 2.1835220  | 4.5221610  | 0.8355808  |
| C | 1.6727810  | 3.1222680  | 1.2135678  |
| C | 1.7000310  | 3.1733200  | -1.1106682 |
| H | 1.1784030  | 5.2623310  | -0.9584242 |
| H | 2.9062680  | 4.9968590  | -1.2036142 |
| H | 1.6084550  | 5.3081520  | 1.3398758  |
| H | 3.2286880  | 4.6477320  | 1.1421288  |
| H | 2.5032890  | 2.4258680  | 1.3883618  |
| H | 1.0171190  | 3.0836340  | 2.0869488  |
| H | 2.6162850  | 2.5729640  | -1.2052642 |
| H | 1.1147880  | 3.0703460  | -2.0291382 |
| N | 0.9362780  | 2.6212920  | 0.0292628  |
| H | 0.0052540  | 3.0476940  | 0.0177318  |
| C | -0.0503730 | -1.7851100 | -1.5032332 |
| C | 0.1050430  | -3.2705070 | -1.1966962 |
| C | 0.8452370  | -3.2318510 | 0.1325208  |
| C | 0.1242690  | -2.0971030 | 0.8430788  |
| H | 0.8675090  | -1.4228630 | -1.9949952 |
| H | -0.8714680 | -1.5470820 | -2.1928332 |
| H | -0.8814800 | -3.7465790 | -1.0608782 |
| H | 0.6291020  | -3.8136440 | -1.9921412 |
| H | 0.8185180  | -4.1764760 | 0.6894408  |
| H | 1.9001330  | -2.9618600 | -0.0323902 |
| H | -0.7909280 | -2.4850090 | 1.3305708  |
| H | 0.7081290  | -1.6333400 | 1.6433728  |
| N | -0.2652340 | -1.1258370 | -0.2004152 |
| C | -4.9102270 | -1.4016610 | 1.4148648  |
| C | -3.3763700 | -1.4517690 | 1.2643038  |
| H | -5.1973750 | -0.8355610 | 2.3104558  |
| H | -5.3227010 | -2.4132890 | 1.5209938  |
| H | -2.8187300 | -1.0662420 | 2.1267778  |
| H | -3.0069830 | -2.4598030 | 1.0329568  |
| C | -5.1222870 | 0.6500960  | 0.2296648  |
| H | -5.5124400 | 1.0948080  | -0.6954942 |
| H | -5.6010950 | 1.1710670  | 1.0686618  |
| C | -3.5914270 | 0.7860060  | 0.3087908  |
| H | -3.1525530 | 1.4226520  | -0.4670922 |
| H | -3.2163120 | 1.1311250  | 1.2780928  |
| C | -3.5397250 | -1.1740640 | -1.1564302 |
| H | -3.2821270 | -0.4611050 | -1.9497462 |
| H | -2.9787450 | -2.1000520 | -1.3381102 |
| C | -5.0520820 | -1.4053540 | -0.9643462 |

|    |            |            |            |
|----|------------|------------|------------|
| H  | -5.6147760 | -1.0070310 | -1.8179812 |
| H  | -5.2825180 | -2.4768550 | -0.8924292 |
| N  | -5.5241310 | -0.7568030 | 0.2566068  |
| N  | -3.0091750 | -0.5828450 | 0.1075548  |
| H  | -1.9351960 | -0.5754150 | 0.0284518  |
| Br | -1.0680180 | 1.3787110  | -2.0508722 |

**TSb3**

|    |            |            |            |
|----|------------|------------|------------|
| Ni | 0.3281836  | 0.5361212  | -0.1267351 |
| Br | -0.7520544 | 0.8001012  | 2.2017929  |
| C  | 4.1590766  | -0.4567088 | -1.1631741 |
| C  | 4.7894806  | -0.6412658 | 0.0667409  |
| C  | 4.0419796  | -0.6436308 | 1.2405559  |
| C  | 2.6625346  | -0.4668768 | 1.1881279  |
| C  | 2.0345956  | -0.2943088 | -0.0427021 |
| C  | 2.7807286  | -0.2927658 | -1.2217961 |
| H  | 4.7537586  | -0.4421238 | -2.0764691 |
| H  | 4.5387926  | -0.7738038 | 2.1996539  |
| H  | 2.0857026  | -0.4251098 | 2.1122529  |
| H  | 2.2893406  | -0.1346958 | -2.1833681 |
| C  | 6.2718656  | -0.8176358 | 0.0813669  |
| F  | 6.8993566  | 0.2507252  | -0.4363411 |
| F  | 6.7544016  | -1.0030818 | 1.3144699  |
| F  | 6.6511316  | -1.8704608 | -0.6594631 |
| C  | 2.3246556  | 4.3550192  | -0.6631821 |
| C  | 2.2478786  | 4.2798922  | 0.8739809  |
| C  | 1.8622936  | 2.8318652  | 1.1487419  |
| C  | 1.6673316  | 3.0533132  | -1.1531781 |
| H  | 1.8019496  | 5.2396872  | -1.0466531 |
| H  | 3.3609196  | 4.4212512  | -1.0155851 |
| H  | 1.4653906  | 4.9514432  | 1.2551099  |
| H  | 3.1846426  | 4.5644092  | 1.3667689  |
| H  | 2.7403676  | 2.1701662  | 1.1044189  |
| H  | 1.3433056  | 2.6534712  | 2.0954819  |
| H  | 2.4226826  | 2.3237082  | -1.4776901 |
| H  | 0.9478736  | 3.1693472  | -1.9676371 |
| N  | 0.9845736  | 2.4608172  | 0.0201219  |
| H  | 0.0859406  | 2.9326222  | 0.1487169  |
| C  | 0.1903916  | -2.0817118 | -1.4793421 |
| C  | 0.1267766  | -3.5557628 | -1.0748611 |
| C  | 0.7296026  | -3.5378478 | 0.3234579  |
| C  | 0.1345316  | -2.2575058 | 0.8873849  |



|    |            |            |            |
|----|------------|------------|------------|
| H  | 1.1389746  | -1.8823628 | -2.0056441 |
| H  | -0.6076514 | -1.7774358 | -2.1714961 |
| H  | -0.9183734 | -3.9015918 | -1.0253261 |
| H  | 0.6543966  | -4.2071368 | -1.7814101 |
| H  | 0.4994786  | -4.4283658 | 0.9210449  |
| H  | 1.8245396  | -3.4352768 | 0.2632159  |
| H  | -0.9013974 | -2.4433188 | 1.2449419  |
| H  | 0.6703606  | -1.8546338 | 1.7527049  |
| N  | 0.1053046  | -1.3217988 | -0.2309391 |
| C  | -5.4698014 | -0.7808318 | 1.1669259  |
| C  | -4.0063374 | -0.7027858 | 1.6519309  |
| H  | -6.0877454 | -0.0215788 | 1.6639949  |
| H  | -5.9040464 | -1.7606498 | 1.4025679  |
| H  | -3.8520274 | -0.0300848 | 2.5036269  |
| H  | -3.5788434 | -1.6782828 | 1.9160129  |
| C  | -5.1452494 | 0.8148692  | -0.5743541 |
| H  | -5.1061174 | 0.9259392  | -1.6658601 |
| H  | -5.9146424 | 1.5023862  | -0.2006391 |
| C  | -3.7741534 | 1.1318552  | 0.0518099  |
| H  | -3.0472724 | 1.5538352  | -0.6549041 |
| H  | -3.8312694 | 1.7795702  | 0.9351989  |
| C  | -3.1743324 | -1.1526968 | -0.6111731 |
| H  | -2.6239794 | -0.6559078 | -1.4212541 |
| H  | -2.5860184 | -2.0147668 | -0.2742131 |
| C  | -4.6402234 | -1.4836028 | -0.9515541 |
| H  | -4.8060154 | -1.4149888 | -2.0338641 |
| H  | -4.9035354 | -2.5044798 | -0.6436421 |
| N  | -5.5494524 | -0.5593898 | -0.2740291 |
| N  | -3.2005144 | -0.1716338 | 0.5166519  |
| H  | -2.2273184 | 0.0205522  | 0.8743739  |
| Br | -0.9467204 | 1.1559292  | -2.1856651 |

**b5**

|    |           |           |            |
|----|-----------|-----------|------------|
| Ni | 1.1687542 | 0.2822145 | 0.1708963  |
| C  | 3.9040253 | 1.1458295 | -1.4997677 |
| C  | 3.9079553 | 1.9231285 | -0.1618657 |
| C  | 2.6603993 | 2.7962645 | -0.2373547 |
| C  | 2.5911103 | 1.5506285 | -2.1752707 |
| H  | 4.7696203 | 1.3862555 | -2.1283037 |
| H  | 3.9184013 | 0.0615135 | -1.3274377 |
| H  | 4.8202413 | 2.5108375 | -0.0072697 |
| H  | 3.8071373 | 1.2328945 | 0.6891953  |

|    |            |            |            |
|----|------------|------------|------------|
| H  | 2.2076013  | 3.0252345  | 0.7326343  |
| H  | 2.8775653  | 3.7382365  | -0.7737427 |
| H  | 2.1125803  | 0.7393325  | -2.7328077 |
| H  | 2.7530833  | 2.4100925  | -2.8505667 |
| N  | 1.7557743  | 1.9445675  | -1.0291007 |
| H  | 0.9153582  | 2.4424785  | -1.3140467 |
| H  | -1.1673158 | -0.3439285 | -0.7466127 |
| Br | 0.2119242  | 1.6895455  | 1.9775823  |
| C  | -2.2235667 | 1.4571255  | -0.6743447 |
| C  | -3.6987998 | 1.8601325  | -0.4782987 |
| H  | -1.5414678 | 1.8820715  | 0.0772833  |
| H  | -1.8338218 | 1.6747125  | -1.6776017 |
| H  | -3.7752747 | 2.6924075  | 0.2322973  |
| H  | -4.1542587 | 2.1891445  | -1.4219547 |
| C  | -2.4606137 | -0.3944375 | 0.9154643  |
| H  | -2.4396368 | -1.4912475 | 0.9652513  |
| H  | -1.6500388 | 0.0207495  | 1.5303433  |
| C  | -3.8373517 | 0.2158415  | 1.2416823  |
| H  | -4.4989678 | -0.5268095 | 1.7054553  |
| H  | -3.7245397 | 1.0479855  | 1.9494113  |
| C  | -4.5205867 | -0.3200075 | -0.9785067 |
| H  | -5.0447757 | -1.1840995 | -0.5495907 |
| H  | -5.1133418 | 0.0299345  | -1.8332397 |
| C  | -3.0941337 | -0.7057115 | -1.4260567 |
| H  | -2.8838187 | -1.7808815 | -1.3738467 |
| H  | -2.8442227 | -0.3689445 | -2.4395977 |
| N  | -4.4787397 | 0.7328255  | 0.0322023  |
| N  | -2.1487837 | -0.0260745 | -0.4985757 |
| Br | 0.4764832  | -1.1725875 | -1.7549327 |
| C  | 1.9334152  | -3.3203245 | 0.6349063  |
| C  | 0.5568083  | -3.1023475 | 1.2935583  |
| C  | 0.7868963  | -1.9578755 | 2.2702663  |
| C  | 2.7884993  | -2.1353625 | 1.1037163  |
| H  | 2.3909003  | -4.2717265 | 0.9314193  |
| H  | 1.8315822  | -3.3163995 | -0.4558037 |
| H  | 0.1699493  | -3.9985275 | 1.7927083  |
| H  | -0.1625808 | -2.7965335 | 0.5212893  |
| H  | -0.0947248 | -1.3418875 | 2.4837523  |
| H  | 1.1716383  | -2.3449885 | 3.2320173  |
| H  | 3.3962423  | -1.6959465 | 0.3021213  |
| H  | 3.4664113  | -2.4448635 | 1.9183573  |
| N  | 1.8102573  | -1.1479235 | 1.5927143  |

|   |           |            |           |
|---|-----------|------------|-----------|
| H | 2.2307483 | -0.4925485 | 2.2499703 |
|---|-----------|------------|-----------|

**TSb4**

|    |            |            |            |
|----|------------|------------|------------|
| Ni | -1.2201848 | -0.2802087 | 0.6111307  |
| C  | -3.7768688 | -2.3476177 | -0.6377083 |
| C  | -3.6993278 | -1.0297317 | -1.4391853 |
| C  | -3.9062078 | 0.0572463  | -0.3905923 |
| C  | -3.8474358 | -1.9112857 | 0.8281767  |
| H  | -4.6477108 | -2.9539847 | -0.9132583 |
| H  | -2.8772418 | -2.9534967 | -0.7972643 |
| H  | -4.4380378 | -0.9691297 | -2.2469853 |
| H  | -2.7015938 | -0.9165987 | -1.8864503 |
| H  | -3.4163948 | 1.0099533  | -0.6299223 |
| H  | -4.9846888 | 0.2400193  | -0.2279243 |
| H  | -3.2540708 | -2.5468037 | 1.4932937  |
| H  | -4.8935928 | -1.8891307 | 1.1813067  |
| N  | -3.2903728 | -0.5461107 | 0.8025737  |
| H  | -3.5286838 | -0.0322707 | 1.6478907  |
| C  | -1.3364328 | 3.3666963  | 0.6486707  |
| C  | -1.3111768 | 3.1768043  | -0.8799883 |
| C  | -0.3824538 | 1.9549723  | -1.0801473 |
| C  | -0.2474008 | 2.4009883  | 1.1305367  |
| H  | -1.1697018 | 4.4082263  | 0.9562437  |
| H  | -2.3053018 | 3.0470263  | 1.0606127  |
| H  | -0.9333518 | 4.0665373  | -1.4025063 |
| H  | -2.3176768 | 2.9803553  | -1.2752523 |
| H  | -0.7385858 | 1.2713493  | -1.8665573 |
| H  | 0.6189072  | 2.3335533  | -1.4147553 |
| H  | -0.3840608 | 2.0699613  | 2.1699767  |
| H  | 0.7365372  | 2.9369053  | 1.0843887  |
| N  | -0.2961668 | 1.2921983  | 0.2036727  |
| H  | 1.0537262  | -0.8082387 | 0.8488927  |
| Br | -0.5323508 | -2.5814557 | 1.0548197  |
| C  | 2.8501112  | -1.8317217 | 1.1907287  |
| C  | 4.2256252  | -1.8675937 | 0.4937557  |
| H  | 2.9065802  | -1.5580757 | 2.2513937  |
| H  | 2.2674782  | -2.7559407 | 1.1129917  |
| H  | 5.0362582  | -1.8648347 | 1.2334377  |
| H  | 4.3355262  | -2.7796967 | -0.1073473 |
| C  | 2.6405642  | 0.5760983  | 0.7850257  |
| H  | 2.0234602  | 1.2844303  | 0.2223877  |
| H  | 2.4950572  | 0.7888033  | 1.8512397  |

|   |           |            |            |
|---|-----------|------------|------------|
| C | 4.1207502 | 0.5075773  | 0.3585237  |
| H | 4.3806832 | 1.3714813  | -0.2660623 |
| H | 4.7884222 | 0.5230503  | 1.2303577  |
| C | 3.4300762 | -0.8217037 | -1.4938283 |
| H | 3.5028882 | 0.0946783  | -2.0943433 |
| H | 3.7204432 | -1.6600077 | -2.1397883 |
| C | 2.0008392 | -1.0180947 | -0.9554843 |
| H | 1.2598452 | -0.3170277 | -1.3561693 |
| H | 1.6046022 | -2.0330437 | -1.0751993 |
| N | 4.3893372 | -0.7176607 | -0.3935333 |
| N | 2.0493542 | -0.7674487 | 0.5182247  |

**b6**

|    |             |             |             |
|----|-------------|-------------|-------------|
| Ni | -1.05282800 | 0.26482100  | 0.31709700  |
| C  | -3.60211500 | -1.80046900 | -0.93797500 |
| C  | -3.52486800 | -0.48291000 | -1.74043800 |
| C  | -3.73408400 | 0.60513600  | -0.69314100 |
| C  | -3.68375300 | -1.36242100 | 0.52656500  |
| H  | -4.46789500 | -2.41165900 | -1.21858200 |
| H  | -2.69804500 | -2.40174100 | -1.09004900 |
| H  | -4.26280800 | -0.42369700 | -2.54905600 |
| H  | -2.52681800 | -0.36932400 | -2.18680900 |
| H  | -3.24175400 | 1.55695100  | -0.93094000 |
| H  | -4.81289000 | 0.78980700  | -0.53477900 |
| H  | -3.09713600 | -1.99815200 | 1.19724500  |
| H  | -4.73266300 | -1.33803600 | 0.87140500  |
| N  | -3.12405500 | 0.00150800  | 0.50293100  |
| H  | -3.36496300 | 0.51623200  | 1.34695100  |
| C  | -1.16447200 | 3.92096500  | 0.34642500  |
| C  | -1.13468400 | 3.73021100  | -1.18200500 |
| C  | -0.21507300 | 2.50052800  | -1.37791200 |
| C  | -0.08236300 | 2.94956700  | 0.83234700  |
| H  | -0.99342400 | 4.96173500  | 0.65420300  |
| H  | -2.13642600 | 3.60639500  | 0.75494900  |
| H  | -0.74717200 | 4.61653400  | -1.70316200 |
| H  | -2.14117400 | 3.54237400  | -1.58130700 |
| H  | -0.57492000 | 1.81794700  | -2.16355900 |
| H  | 0.78988600  | 2.87047400  | -1.71179700 |
| H  | -0.22294100 | 2.62102100  | 1.87205000  |
| H  | 0.90479900  | 3.47978700  | 0.78733400  |
| N  | -0.13618000 | 1.83992100  | -0.09283900 |
| H  | 1.27841863  | -1.20079678 | 0.65835922  |

|    |             |             |             |
|----|-------------|-------------|-------------|
| Br | -0.36534800 | -2.03641400 | 0.76452800  |
| C  | 3.30056155  | -1.73984004 | 0.62478262  |
| C  | 4.55141926  | -1.21363928 | -0.10846258 |
| H  | 3.40622832  | -1.74638003 | 1.71650489  |
| H  | 2.96650239  | -2.73569384 | 0.31404899  |
| H  | 5.41261406  | -1.17519573 | 0.57060316  |
| H  | 4.82277419  | -1.87428997 | -0.94227845 |
| C  | 2.44288182  | 0.53802194  | 0.91680597  |
| H  | 1.60390960  | 1.16736193  | 0.60170773  |
| H  | 2.37408502  | 0.42011518  | 2.00521800  |
| C  | 3.83142163  | 0.99314248  | 0.42428919  |
| H  | 3.78778654  | 2.02439918  | 0.05195394  |
| H  | 4.57032111  | 0.97071411  | 1.23652682  |
| C  | 3.29249478  | 0.04402480  | -1.69360719 |
| H  | 3.06225015  | 1.06667933  | -2.02057588 |
| H  | 3.70954090  | -0.48963492 | -2.55702905 |
| C  | 2.03015160  | -0.66654843 | -1.17066102 |
| H  | 1.09591558  | -0.11521892 | -1.32716511 |
| H  | 1.88984401  | -1.68440145 | -1.55260683 |
| N  | 4.31359184  | 0.12362520  | -0.64821495 |
| N  | 2.18487348  | -0.80061383 | 0.31056994  |

### TSb5

|    |            |            |            |
|----|------------|------------|------------|
| Ni | -1.4968103 | -1.1706218 | -0.2673798 |
| C  | -4.6698993 | 0.4789012  | -0.9281728 |
| C  | -4.9662873 | 0.6225922  | 0.5660412  |
| C  | -4.1907373 | -0.5276398 | 1.2297132  |
| C  | -4.4376503 | -1.0106938 | -1.0836128 |
| H  | -5.4820253 | 0.8471192  | -1.5653608 |
| H  | -3.7481213 | 1.0050382  | -1.2132098 |
| H  | -6.0432353 | 0.5092012  | 0.7515192  |
| H  | -4.6741113 | 1.6026562  | 0.9635282  |
| H  | -3.3609633 | -0.1767448 | 1.8522982  |
| H  | -4.8535423 | -1.1382618 | 1.8605132  |
| H  | -3.8857753 | -1.2711418 | -1.9943728 |
| H  | -5.3969963 | -1.5584138 | -1.0776318 |
| N  | -3.6357783 | -1.3376218 | 0.1161292  |
| H  | -3.7162423 | -2.3270518 | 0.3334052  |
| C  | -0.5311973 | 1.0184002  | 3.1805112  |
| C  | -1.5702013 | 1.8995122  | 2.4979932  |
| C  | -1.4383233 | 1.4787752  | 1.0303082  |
| C  | -0.6689113 | -0.2851068 | 2.3929142  |

|    |            |            |            |
|----|------------|------------|------------|
| H  | 0.4766207  | 1.4428752  | 3.0339452  |
| H  | -0.6851113 | 0.9009182  | 4.2608472  |
| H  | -1.4191513 | 2.9753102  | 2.6583532  |
| H  | -2.5732573 | 1.6499682  | 2.8795612  |
| H  | -2.3839183 | 1.6054742  | 0.4752952  |
| H  | -0.7276793 | 2.1708362  | 0.5171172  |
| H  | -1.4658653 | -0.9173578 | 2.8548892  |
| H  | 0.2530407  | -0.8988148 | 2.4413572  |
| N  | -0.9681023 | 0.1056222  | 1.0327082  |
| H  | 0.4730537  | 0.8841502  | -1.5585698 |
| Br | -1.2594373 | 0.2531272  | -2.4875148 |
| C  | 2.3705687  | 0.8233262  | -2.4094558 |
| C  | 3.7962587  | 1.1937972  | -1.9551498 |
| H  | 2.2129047  | -0.2508158 | -2.5515878 |
| H  | 2.0542187  | 1.3330212  | -3.3282808 |
| H  | 4.3370757  | 0.3053852  | -1.6023138 |
| H  | 4.3685587  | 1.6234602  | -2.7872298 |
| C  | 1.9170067  | 0.7379272  | -0.0064538 |
| H  | 1.0766217  | 0.8300282  | 0.6947632  |
| H  | 2.0798497  | -0.3369348 | -0.1465068 |
| C  | 3.2105737  | 1.4919112  | 0.3374732  |
| H  | 3.0368677  | 2.2602682  | 1.1035802  |
| H  | 3.9622197  | 0.7968602  | 0.7295562  |
| C  | 2.8522867  | 3.2525422  | -1.2248808 |
| H  | 2.9406057  | 4.0557392  | -0.4824258 |
| H  | 3.1894197  | 3.6594062  | -2.1877998 |
| C  | 1.3948237  | 2.7540392  | -1.3098338 |
| H  | 0.7898967  | 3.0410242  | -0.4413538 |
| H  | 0.8620247  | 3.0749272  | -2.2134428 |
| N  | 3.7460247  | 2.1577352  | -0.8550478 |
| N  | 1.4439497  | 1.2635982  | -1.3265818 |
| C  | 2.5325427  | -2.8473978 | 0.0364262  |
| C  | 1.5560547  | -3.0835568 | 1.0012302  |
| C  | 0.2117477  | -3.0803088 | 0.6510532  |
| C  | -0.1628603 | -2.7167168 | -0.6559138 |
| C  | 0.8275657  | -2.5220328 | -1.6463008 |
| C  | 2.1576737  | -2.5881258 | -1.2912918 |
| H  | 1.8464657  | -3.3009058 | 2.0269792  |
| H  | -0.5532233 | -3.3230858 | 1.3868122  |
| H  | 0.5208847  | -2.3121528 | -2.6690418 |
| H  | 2.9334267  | -2.4453838 | -2.0460368 |
| C  | 3.9806227  | -2.8174038 | 0.3731202  |

|    |            |            |            |
|----|------------|------------|------------|
| F  | 4.2280317  | -3.1497258 | 1.6404192  |
| F  | 4.4988407  | -1.5756148 | 0.1855752  |
| F  | 4.7015247  | -3.6282408 | -0.4115218 |
| Br | -1.8744403 | -3.5075988 | -1.3716578 |

**b7**

|    |            |            |            |
|----|------------|------------|------------|
| Ni | -1.6945186 | -1.6278293 | -0.0840827 |
| C  | -4.6792326 | 0.4816847  | -1.2889167 |
| C  | -5.2716746 | 0.4724697  | 0.1221943  |
| C  | -4.5600376 | -0.6831983 | 0.8437313  |
| C  | -4.2848696 | -0.9620653 | -1.5201447 |
| H  | -5.3877266 | 0.8434907  | -2.0425647 |
| H  | -3.7769396 | 1.1041207  | -1.3652627 |
| H  | -6.3515356 | 0.2770737  | 0.0762993  |
| H  | -5.1444896 | 1.4290747  | 0.6465003  |
| H  | -3.8784536 | -0.3391403 | 1.6319623  |
| H  | -5.2815766 | -1.3598763 | 1.3217543  |
| H  | -3.5026876 | -1.0801083 | -2.2765057 |
| H  | -5.1536666 | -1.5741583 | -1.8113297 |
| N  | -3.7800926 | -1.4134403 | -0.1904187 |
| H  | -3.9576976 | -2.4142553 | -0.1134417 |
| C  | -0.8959866 | 0.9475307  | 3.1164403  |
| C  | -1.9264276 | 1.7322647  | 2.3147223  |
| C  | -1.7817566 | 1.1227937  | 0.9251493  |
| C  | -0.9938246 | -0.4473263 | 2.4999433  |
| H  | 0.1097114  | 1.3664547  | 2.9501623  |
| H  | -1.0731156 | 0.9501047  | 4.1976963  |
| H  | -1.7648066 | 2.8166487  | 2.3241473  |
| H  | -2.9380046 | 1.5451367  | 2.7071953  |
| H  | -2.6666826 | 1.2128277  | 0.2873043  |
| H  | -0.9800946 | 1.6137127  | 0.3426423  |
| H  | -1.7374896 | -1.0724163 | 3.0298013  |
| H  | -0.0480326 | -1.0067373 | 2.5311023  |
| N  | -1.4308196 | -0.2723953 | 1.1258783  |
| H  | 0.6105434  | 0.9105767  | -1.3226687 |
| Br | -1.1242996 | 0.5885867  | -2.3549617 |
| C  | 2.5083464  | 0.9953477  | -2.1610377 |
| C  | 3.9140704  | 1.4299017  | -1.7107747 |
| H  | 2.4215554  | -0.0759393 | -2.3630897 |
| H  | 2.1263674  | 1.5353127  | -3.0357327 |
| H  | 4.5190454  | 0.5555287  | -1.4347437 |
| H  | 4.4380954  | 1.9573847  | -2.5176137 |

|    |            |            |            |
|----|------------|------------|------------|
| C  | 2.0846984  | 0.7383447  | 0.2438143  |
| H  | 1.2787634  | 0.8266917  | 0.9837913  |
| H  | 2.2727604  | -0.3259763 | 0.0718753  |
| C  | 3.3669584  | 1.5161817  | 0.6044883  |
| H  | 3.2010954  | 2.2011847  | 1.4470663  |
| H  | 4.1596954  | 0.8155977  | 0.8948703  |
| C  | 2.8546394  | 3.3670497  | -0.8085707 |
| H  | 2.9059934  | 4.1134297  | -0.0072227 |
| H  | 3.1478834  | 3.8682727  | -1.7400207 |
| C  | 1.4301504  | 2.7842247  | -0.9178657 |
| H  | 0.8211114  | 2.9719597  | -0.0233977 |
| H  | 0.8558594  | 3.1178817  | -1.7906847 |
| N  | 3.8235684  | 2.3053747  | -0.5398157 |
| N  | 1.5732004  | 1.3062187  | -1.0377637 |
| C  | 2.8521114  | -2.8503043 | -0.1000127 |
| C  | 2.0886214  | -3.0622413 | 1.0417883  |
| C  | 0.7234794  | -2.7746233 | 1.0226623  |
| C  | 0.1210614  | -2.2021843 | -0.0983747 |
| C  | 0.8844094  | -2.0757203 | -1.2682527 |
| C  | 2.2321244  | -2.4043693 | -1.2707457 |
| H  | 2.5566224  | -3.4560723 | 1.9423633  |
| H  | 0.1272404  | -3.0103983 | 1.9048863  |
| H  | 0.4117374  | -1.6926383 | -2.1731087 |
| H  | 2.8235754  | -2.3077203 | -2.1833877 |
| C  | 4.3357994  | -2.9440093 | -0.0739017 |
| F  | 4.8038334  | -3.6035203 | 0.9876223  |
| F  | 4.8865554  | -1.6997563 | -0.0272277 |
| F  | 4.8384214  | -3.5220043 | -1.1698877 |
| Br | -2.0431676 | -3.5600153 | -1.3163227 |

**TSb6**

|    |            |            |            |
|----|------------|------------|------------|
| Ni | -1.3602719 | -0.2298885 | -0.5492716 |
| C  | -4.4680249 | 1.9139545  | 0.4425404  |
| C  | -4.6534929 | 0.4695625  | 0.9304934  |
| C  | -4.4494419 | -0.3715265 | -0.3187696 |
| C  | -3.7397479 | 1.7985425  | -0.9049356 |
| H  | -5.4329819 | 2.4201945  | 0.3127984  |
| H  | -3.8793449 | 2.4956375  | 1.1602844  |
| H  | -5.6303199 | 0.2918715  | 1.3951934  |
| H  | -3.8756889 | 0.2255525  | 1.6652964  |
| H  | -4.1051569 | -1.3915815 | -0.1016116 |
| H  | -5.3784969 | -0.4228405 | -0.9139026 |



|    |            |            |            |
|----|------------|------------|------------|
| H  | -2.8220399 | 2.3939375  | -0.9616266 |
| H  | -4.3957929 | 2.1129815  | -1.7319476 |
| N  | -3.4019039 | 0.3617385  | -1.0459816 |
| H  | -3.3898119 | 0.1069545  | -2.0320766 |
| C  | -1.7877149 | -4.3319495 | -0.3034746 |
| C  | -2.3700759 | -3.9981665 | 1.0650444  |
| C  | -1.8398989 | -2.5844235 | 1.3089064  |
| C  | -1.9688289 | -3.0105985 | -1.0393396 |
| H  | -0.7121129 | -4.5507125 | -0.2105356 |
| H  | -2.2718509 | -5.1809325 | -0.8006556 |
| H  | -2.0786309 | -4.6988055 | 1.8565014  |
| H  | -3.4698179 | -3.9881375 | 1.0103654  |
| H  | -2.4825149 | -1.9936365 | 1.9800924  |
| H  | -0.8437259 | -2.6380875 | 1.7863524  |
| H  | -2.9866129 | -2.9385135 | -1.4768486 |
| H  | -1.2667429 | -2.8890505 | -1.8772356 |
| N  | -1.7888579 | -1.9912535 | -0.0154896 |
| H  | 0.7586611  | 1.4942185  | 0.3662274  |
| Br | -1.1846719 | 1.1869455  | 1.4912784  |
| C  | 1.1963401  | 3.4234035  | -0.2089776 |
| C  | 2.4769331  | 4.2396775  | -0.4670606 |
| H  | 0.5674051  | 3.2574235  | -1.0919826 |
| H  | 0.5656931  | 3.8309785  | 0.5899174  |
| H  | 2.6169101  | 4.4192115  | -1.5407036 |
| H  | 2.4181321  | 5.2195345  | 0.0236884  |
| C  | 2.5632481  | 1.4519875  | -0.7516236 |
| H  | 2.7402331  | 0.4172475  | -0.4375796 |
| H  | 2.0147991  | 1.4337125  | -1.7005786 |
| C  | 3.8438221  | 2.3091755  | -0.7519966 |
| H  | 4.6849311  | 1.7491855  | -0.3224976 |
| H  | 4.1237111  | 2.5855695  | -1.7760796 |
| C  | 3.4486271  | 3.1774735  | 1.4316604  |
| H  | 4.3812561  | 2.7639185  | 1.8351224  |
| H  | 3.2305261  | 4.0984325  | 1.9881064  |
| C  | 2.2969341  | 2.1607015  | 1.5780514  |
| H  | 2.6368151  | 1.1483005  | 1.8288864  |
| H  | 1.5278031  | 2.4497655  | 2.3033424  |
| N  | 3.6551881  | 3.5308035  | 0.0301314  |
| N  | 1.6285161  | 2.0634455  | 0.2471604  |
| C  | 2.9409651  | -2.1402335 | -0.1906276 |
| C  | 2.2388931  | -2.1681005 | -1.3943076 |
| C  | 0.9101561  | -1.7640255 | -1.4363506 |

|    |            |            |            |
|----|------------|------------|------------|
| C  | 0.2650791  | -1.3032055 | -0.2828026 |
| C  | 0.9673981  | -1.3125285 | 0.9281154  |
| C  | 2.2946881  | -1.7229575 | 0.9721304  |
| H  | 2.7390431  | -2.4864615 | -2.3071876 |
| H  | 0.4000791  | -1.7500215 | -2.3988526 |
| H  | 0.4891951  | -0.9490575 | 1.8361684  |
| H  | 2.8384811  | -1.7087215 | 1.9173304  |
| C  | 4.4104231  | -2.3756855 | -0.1547176 |
| F  | 4.8487451  | -3.0876045 | -1.1963756 |
| F  | 4.8018371  | -3.0028635 | 0.9613474  |
| F  | 5.0813871  | -1.2000395 | -0.1784706 |
| Br | -0.5682779 | 1.1795705  | -2.3700556 |

### TSc1

|   |            |            |            |
|---|------------|------------|------------|
| C | -2.9348721 | -1.1273626 | 1.3860082  |
| C | -1.5309691 | -0.4783196 | 1.3601422  |
| H | -3.6179571 | -0.5805476 | 2.0508792  |
| H | -2.8837931 | -2.1625796 | 1.7490862  |
| H | -1.5144711 | 0.4837094  | 1.8966112  |
| H | -0.7523321 | -1.1193676 | 1.7876782  |
| C | -3.5392681 | 0.2107064  | -0.4841798 |
| H | -4.0541561 | 0.2006434  | -1.4545878 |
| H | -4.1375811 | 0.8309914  | 0.1979722  |
| C | -2.0980811 | 0.7600904  | -0.6227468 |
| H | -1.8116821 | 0.9103384  | -1.6746408 |
| H | -1.9662921 | 1.7217164  | -0.1006388 |
| C | -1.2086341 | -1.4711396 | -0.8134708 |
| H | -0.8256751 | -1.2647816 | -1.8209118 |
| H | -0.5065931 | -2.1711446 | -0.3502308 |
| C | -2.6685381 | -1.9785756 | -0.8220128 |
| H | -3.0984751 | -1.9542536 | -1.8332808 |
| H | -2.7281501 | -3.0167706 | -0.4692928 |
| N | -1.1506791 | -0.2081336 | -0.0424338 |
| N | -3.5102931 | -1.1484626 | 0.0429552  |
| P | 2.4811859  | -1.9892486 | 0.0145562  |
| F | 1.5010379  | -3.2649476 | -0.1360378 |
| F | 1.3901719  | -1.3080656 | 1.0602342  |
| F | 3.2404099  | -2.6556056 | 1.2577262  |
| F | 3.5269629  | -2.5991146 | -1.0321148 |
| F | 1.6764339  | -1.2481026 | -1.2198458 |
| F | 3.3919069  | -0.6310266 | 0.1684182  |
| C | 2.6638129  | 2.7501074  | 0.7178912  |

|   |           |           |            |
|---|-----------|-----------|------------|
| C | 3.0091319 | 2.3288144 | -0.7109468 |
| C | 1.7122259 | 1.6900304 | -1.2006758 |
| C | 1.7425029 | 1.6245724 | 1.1792172  |
| H | 2.1260829 | 3.7093844 | 0.7244822  |
| H | 3.7947459 | 1.5652464 | -0.7011708 |
| H | 3.3336149 | 3.1609984 | -1.3434898 |
| H | 1.8291619 | 0.8624754 | -1.9114918 |
| H | 0.1635349 | 0.4734534 | -0.0341578 |
| H | 2.3089619 | 0.7477784 | 1.5383332  |
| H | 1.0076189 | 1.8801574 | 1.9554552  |
| H | 3.5435239 | 2.8530814 | 1.3606632  |
| N | 1.0714139 | 1.1847814 | -0.0141198 |
| H | 1.0240529 | 2.4284714 | -1.6558298 |

**RN'**

|   |            |            |            |
|---|------------|------------|------------|
| C | -3.1417897 | 0.1923711  | 1.1911632  |
| C | -1.6072557 | 0.3444011  | 1.1513972  |
| H | -3.6258297 | 1.1738371  | 1.2748912  |
| H | -3.4583787 | -0.4029249 | 2.0575602  |
| H | -1.2662397 | 1.3678151  | 0.9607202  |
| H | -1.0950547 | -0.0233759 | 2.0485212  |
| C | -3.1156217 | 0.2301971  | -1.1915118 |
| H | -3.5930877 | -0.1835439 | -2.0886698 |
| H | -3.4190407 | 1.2829651  | -1.1163528 |
| C | -1.5810997 | 0.1000451  | -1.2811678 |
| H | -1.2421247 | -0.5848999 | -2.0665568 |
| H | -1.0534687 | 1.0525791  | -1.4033688 |
| C | -1.6017597 | -1.8865389 | 0.1494722  |
| H | -1.0622157 | -2.4880399 | -0.5864038 |
| H | -1.2800227 | -2.2298079 | 1.1378092  |
| C | -3.1306547 | -1.8510829 | -0.0334708 |
| H | -3.4253037 | -2.3048719 | -0.9888638 |
| H | -3.6300427 | -2.4178099 | 0.7624382  |
| N | -1.1155397 | -0.4784019 | 0.0108072  |
| N | -3.6249377 | -0.4738289 | -0.0164678 |
| P | 2.0522443  | -2.2246109 | 0.0260292  |
| F | 0.9631073  | -3.4242179 | 0.0643002  |
| F | 1.1406153  | -1.4176779 | 1.1676122  |
| F | 2.9049273  | -2.9048309 | 1.1940092  |
| F | 2.8843803  | -2.9586209 | -1.1239418 |
| F | 1.1170643  | -1.4747649 | -1.1338188 |
| F | 3.0492853  | -0.9471769 | -0.0125278 |

|   |            |            |            |
|---|------------|------------|------------|
| C | 3.0683993  | 2.5883011  | 0.6929572  |
| C | 3.3734893  | 2.0219481  | -0.6908828 |
| C | 1.9836393  | 1.6166661  | -1.1864778 |
| C | 1.9087663  | 1.6995311  | 1.1419312  |
| H | 2.7359453  | 3.6349351  | 0.6199242  |
| H | 4.0029923  | 1.1285581  | -0.6047848 |
| H | 3.8749433  | 2.7353551  | -1.3549578 |
| H | 1.9773543  | 0.7347281  | -1.8433748 |
| H | -0.0769007 | -0.4634109 | 0.0184722  |
| H | 2.2831293  | 0.7487451  | 1.5622132  |
| H | 1.2517533  | 2.1454301  | 1.9052832  |
| H | 3.9226333  | 2.5557071  | 1.3786262  |
| N | 1.1478013  | 1.3500811  | -0.0353858 |
| H | 1.5038993  | 2.4362391  | -1.7571538 |

**TSc1'**

|   |            |            |            |
|---|------------|------------|------------|
| P | 2.9219846  | -1.5697600 | 0.0196870  |
| F | 3.6486996  | -2.0323180 | 1.3673090  |
| F | 2.0626616  | -0.4437420 | 0.8703750  |
| F | 4.0524126  | -0.4392240 | -0.2618070 |
| F | 3.7118926  | -2.6473140 | -0.8575180 |
| F | 1.6987486  | -2.6224810 | 0.2754770  |
| F | 2.1317486  | -1.0468270 | -1.3471570 |
| C | 1.3621706  | 2.7959790  | 1.0445270  |
| C | 0.2473816  | 2.9621960  | 0.0077450  |
| C | 0.5611156  | 1.8274060  | -0.9480660 |
| C | 2.5564186  | 2.3511640  | 0.2038440  |
| H | 1.1019696  | 1.9885670  | 1.7441440  |
| H | 0.3201076  | 3.9383810  | -0.4993840 |
| H | -0.7586694 | 2.8984360  | 0.4438060  |
| H | 0.1081566  | 1.8178970  | -1.9521750 |
| H | 2.3750696  | 0.8626890  | -1.3385560 |
| H | 3.1356946  | 3.2143690  | -0.1645150 |
| H | 3.2410386  | 1.6668190  | 0.7133030  |
| H | 1.5603686  | 3.7033300  | 1.6244490  |
| N | 1.9329706  | 1.6840250  | -0.9278930 |
| C | -0.8806094 | -0.7492000 | 1.2150940  |
| C | -1.8694184 | -1.9304070 | 1.3438860  |
| H | 0.1599676  | -1.0431610 | 1.3711710  |
| H | -1.1201334 | 0.0792150  | 1.8973080  |
| H | -1.3210894 | -2.8818700 | 1.3511170  |
| H | -2.4402854 | -1.8667540 | 2.2796880  |

|   |            |            |            |
|---|------------|------------|------------|
| C | -0.8394764 | -1.3270670 | -1.1450720 |
| H | -0.7522274 | -0.8778260 | -2.1441840 |
| H | 0.1055306  | -1.8221120 | -0.9128060 |
| C | -2.0561424 | -2.2669320 | -1.0036290 |
| H | -2.7439674 | -2.1731920 | -1.8555480 |
| H | -1.7255144 | -3.3122990 | -0.9608420 |
| C | -3.4028974 | -0.6349700 | 0.0657720  |
| H | -4.1997694 | -0.6859680 | -0.6879770 |
| H | -3.8708984 | -0.3598520 | 1.0208140  |
| C | -2.3296024 | 0.4046050  | -0.3406160 |
| H | -2.4145024 | 0.7098750  | -1.3933260 |
| H | -2.3691074 | 1.3104460  | 0.2786160  |
| N | -0.9987194 | -0.2184340 | -0.1664880 |
| N | -2.8008834 | -1.9533990 | 0.2152970  |
| H | -0.1021954 | 0.6897090  | -0.4458690 |

**\*R<sup>o</sup>N**

|   |            |            |            |
|---|------------|------------|------------|
| P | 2.6867263  | -1.7786095 | -0.0160582 |
| F | 3.4084683  | -2.3552005 | 1.2862618  |
| F | 1.8372953  | -0.7079785 | 0.9398458  |
| F | 3.8313563  | -0.6519225 | -0.2112442 |
| F | 3.4450603  | -2.7918715 | -0.9883092 |
| F | 1.4546883  | -2.8478285 | 0.1716878  |
| F | 1.8671513  | -1.1371865 | -1.3007262 |
| C | 1.2545413  | 2.8957025  | 1.0096798  |
| C | 0.5166953  | 3.1663675  | -0.3065152 |
| C | 0.9830263  | 2.0074535  | -1.1357652 |
| C | 2.5948353  | 2.3213975  | 0.5428468  |
| H | 0.7126743  | 2.1269595  | 1.5866788  |
| H | 0.8454803  | 4.1356075  | -0.7283422 |
| H | -0.5748347 | 3.2319655  | -0.1893932 |
| H | 0.7315033  | 1.8909315  | -2.1922342 |
| H | 2.7255363  | 0.8648075  | -1.0013242 |
| H | 3.3513613  | 3.1171015  | 0.4426268  |
| H | 2.9961443  | 1.5598325  | 1.2216758  |
| H | 1.3631823  | 3.7793835  | 1.6488938  |
| N | 2.2919993  | 1.7500885  | -0.7626832 |
| C | -0.9618377 | -1.3694735 | 1.2393118  |
| C | -2.3674717 | -1.9961735 | 1.1584038  |
| H | -0.1493917 | -2.0962345 | 1.3004448  |
| H | -0.8483247 | -0.6507645 | 2.0602078  |
| H | -2.3001927 | -3.0832795 | 1.0229358  |

|   |            |            |            |
|---|------------|------------|------------|
| H | -2.9270067 | -1.8166865 | 2.0852128  |
| C | -0.9893457 | -1.4837065 | -1.2172862 |
| H | -0.6631917 | -0.9209515 | -2.0993672 |
| H | -0.3164217 | -2.3364195 | -1.0932272 |
| C | -2.4858887 | -1.8491005 | -1.2185402 |
| H | -3.0157367 | -1.3538075 | -2.0430452 |
| H | -2.6152857 | -2.9304345 | -1.3508452 |
| C | -3.1170387 | 0.0099435  | 0.1247708  |
| H | -3.7955787 | 0.4190445  | -0.6345712 |
| H | -3.5171687 | 0.2937915  | 1.1070638  |
| C | -1.6914857 | 0.5662745  | -0.0719912 |
| H | -1.5363677 | 1.0591565  | -1.0382862 |
| H | -1.3810497 | 1.2671755  | 0.7118338  |
| N | -0.7535077 | -0.5958245 | -0.0302902 |
| N | -3.1222147 | -1.4455185 | 0.0343758  |
| H | 0.2316163  | -0.2640105 | -0.0647122 |

**TSc1"**

|   |            |            |            |
|---|------------|------------|------------|
| C | -0.2764834 | -2.8869300 | 0.7684808  |
| C | -0.2648354 | -1.4135080 | 1.2683078  |
| H | -1.3026014 | -3.1690280 | 0.5070238  |
| H | 0.0826646  | -3.5639420 | 1.5542118  |
| H | -1.2691854 | -0.9920190 | 1.3372958  |
| H | 0.2532726  | -1.2984610 | 2.2294408  |
| C | 0.0088306  | -2.2390290 | -1.4960832 |
| H | 0.6341326  | -2.3717070 | -2.3885122 |
| H | -0.9997644 | -2.6035610 | -1.7219962 |
| C | -0.0677194 | -0.7372540 | -1.0914702 |
| H | 0.5346996  | -0.0803300 | -1.7310302 |
| H | -1.0977854 | -0.3804630 | -1.0693772 |
| C | 1.9009946  | -1.0476550 | 0.2637548  |
| H | 2.4343036  | -0.4284900 | -0.4686462 |
| H | 2.3279556  | -0.8685150 | 1.2592018  |
| C | 1.9079546  | -2.5705420 | -0.1118842 |
| H | 2.5500386  | -2.7368850 | -0.9861252 |
| H | 2.3115256  | -3.1627060 | 0.7195358  |
| N | 0.4944146  | -0.6265740 | 0.2730388  |
| N | 0.5670446  | -3.0339860 | -0.4103622 |
| P | -3.6310704 | 0.2110590  | -0.0175802 |
| F | -4.2642224 | -0.3033860 | 1.3660758  |
| F | -2.2886514 | 0.7269760  | 0.8168608  |
| F | -2.8820024 | -1.2538850 | -0.1972972 |

|   |            |            |            |
|---|------------|------------|------------|
| F | -4.8795934 | -0.3205290 | -0.8650682 |
| F | -4.2832664 | 1.6652350  | 0.1592608  |
| F | -2.8805764 | 0.7050920  | -1.3938102 |
| N | 1.1146196  | 2.4396740  | -1.2047612 |
| H | 1.0471596  | 2.9596620  | -2.0756202 |
| C | 2.1270786  | 2.9957920  | -0.3085182 |
| H | 2.0630636  | 4.0985220  | -0.2325492 |
| H | 3.1391726  | 2.7438190  | -0.6496072 |
| C | 1.7724626  | 2.3777110  | 1.0555858  |
| H | 1.8747106  | 3.0998550  | 1.8775228  |
| H | 2.4404956  | 1.5391990  | 1.3108448  |
| C | 0.3331246  | 1.9365100  | 0.8845168  |
| H | -0.3579214 | 1.9683570  | 1.7309468  |
| H | 0.3956836  | 0.6625800  | 0.6254558  |
| C | -0.1251444 | 2.4929550  | -0.4321362 |
| H | -0.4932204 | 3.5300450  | -0.2628182 |
| H | -0.9513594 | 1.9363410  | -0.8921082 |

**•R<sup>B</sup>N**

|   |            |            |            |
|---|------------|------------|------------|
| C | 2.0800909  | -1.8304049 | 1.3897261  |
| C | 0.8662459  | -0.8891069 | 1.2727321  |
| H | 1.7569509  | -2.8152339 | 1.7483341  |
| H | 2.8252479  | -1.4486329 | 2.1012571  |
| H | -0.0876931 | -1.4173109 | 1.2662931  |
| H | 0.8326639  | -0.1115249 | 2.0464471  |
| C | 1.7230099  | -2.3453449 | -0.9095789 |
| H | 2.2234879  | -2.6695249 | -1.8308289 |
| H | 1.1433489  | -3.1941549 | -0.5254389 |
| C | 0.7899309  | -1.1555639 | -1.1810419 |
| H | 1.0504739  | -0.6050269 | -2.0952859 |
| H | -0.2678111 | -1.4227369 | -1.2195419 |
| C | 2.3279379  | 0.4313181  | -0.1654979 |
| H | 2.3172789  | 1.0937671  | -1.0401439 |
| H | 2.4812509  | 1.0478481  | 0.7299061  |
| C | 3.3508709  | -0.7205929 | -0.2807869 |
| H | 3.7280869  | -0.8089879 | -1.3083389 |
| H | 4.2143249  | -0.5323059 | 0.3701841  |
| N | 0.9775299  | -0.1876009 | -0.0490459 |
| N | 2.7332659  | -1.9875199 | 0.0904771  |
| P | -2.7948861 | -1.6324339 | 0.0284881  |
| F | -3.1402541 | -1.8524849 | 1.5813931  |
| F | -1.7821631 | -0.3853949 | 0.4592701  |

|          |            |            |            |
|----------|------------|------------|------------|
| F        | -1.5038721 | -2.6477049 | 0.1779991  |
| F        | -3.7257991 | -2.8516369 | -0.4205179 |
| F        | -3.9944211 | -0.5699329 | -0.1375699 |
| F        | -2.3490591 | -1.3685809 | -1.5299689 |
| N        | -0.4504741 | 2.1098501  | -0.7850019 |
| H        | 0.0799969  | 2.4845301  | -1.5698209 |
| C        | -0.4024841 | 3.0393021  | 0.3598411  |
| H        | -0.4928611 | 4.0905511  | 0.0349831  |
| H        | 0.5502599  | 2.9352091  | 0.9019201  |
| C        | -1.6234041 | 2.6368001  | 1.1810361  |
| H        | -1.9648381 | 3.4451531  | 1.8427641  |
| H        | -1.3896101 | 1.7703631  | 1.8287591  |
| C        | -2.5982221 | 2.2510561  | 0.1250321  |
| H        | -3.5952101 | 1.8744931  | 0.3232101  |
| H        | 0.2479979  | 0.5794121  | -0.1767319 |
| C        | -1.8879061 | 1.9803721  | -1.1521359 |
| H        | -2.1539561 | 2.7074011  | -1.9445889 |
| H        | -2.0953281 | 0.9723151  | -1.5381869 |
| <b>A</b> |            |            |            |
| C        | -1.7952526 | 1.4211484  | -0.2268984 |
| C        | -0.2456366 | 1.3571394  | -0.2179284 |
| H        | -2.2266676 | 1.7462344  | -1.1816584 |
| H        | -2.2251626 | 2.0281134  | 0.5793996  |
| H        | 0.1814134  | 1.7011154  | -1.1670444 |
| H        | 0.1830734  | 1.9800734  | 0.5755576  |
| C        | -1.7988506 | -0.9062006 | -1.1157984 |
| H        | -2.2311586 | -1.8950096 | -0.9190024 |
| H        | -2.2301856 | -0.5108746 | -2.0437154 |
| C        | -0.2490326 | -0.8684716 | -1.0681734 |
| H        | 0.1772864  | -1.8629246 | -0.8924204 |
| H        | 0.1778914  | -0.4931356 | -2.0053564 |
| C        | -0.2469346 | -0.4922436 | 1.2842976  |
| H        | 0.1789524  | -1.4921926 | 1.4266036  |
| H        | 0.1820474  | 0.1561854  | 2.0569296  |
| C        | -1.7966616 | -0.5122456 | 1.3441466  |
| H        | -2.2293656 | -1.5127666 | 1.4669456  |
| H        | -2.2262226 | 0.1534684  | 2.1028756  |
| N        | 0.1604764  | -0.0016456 | -0.0008774 |
| N        | -2.2802226 | 0.0014684  | 0.0007896  |
| P        | 3.4248864  | -0.0000296 | -0.0000354 |
| F        | 4.3356294  | 1.3142904  | -0.2133134 |



|           |            |            |            |
|-----------|------------|------------|------------|
| F         | 2.4686704  | 0.8462324  | 1.0360606  |
| F         | 2.4694534  | 0.4743094  | -1.2513024 |
| F         | 4.3366484  | -0.8418036 | -1.0308264 |
| F         | 4.3354634  | -0.4719506 | 1.2451996  |
| F         | 2.4696454  | -1.3209686 | 0.2140786  |
| H         | -3.3001826 | 0.0026854  | 0.0014676  |
| <b>B</b>  |            |            |            |
| C         | 1.0401602  | 0.4665153  | 1.3216596  |
| C         | -0.5010738 | 0.3470473  | 1.3352996  |
| H         | 1.4921922  | -0.1512577 | 2.1085986  |
| H         | 1.3596902  | 1.5025543  | 1.4962406  |
| H         | -0.8740248 | -0.4274067 | 2.0179926  |
| H         | -1.0180108 | 1.2815913  | 1.5889316  |
| C         | 1.1246652  | -1.3248997 | -0.2500164 |
| H         | 1.6048092  | -1.6691837 | -1.1753344 |
| H         | 1.4789152  | -1.9733047 | 0.5624056  |
| C         | -0.4169528 | -1.3724967 | -0.3711774 |
| H         | -0.7666568 | -1.6005147 | -1.3863454 |
| H         | -0.8914788 | -2.0911867 | 0.3093876  |
| C         | -0.4693488 | 0.9661573  | -1.0080094 |
| H         | -0.9220348 | 0.7078713  | -1.9739614 |
| H         | -0.8861988 | 1.9339033  | -0.7001574 |
| C         | 1.0765692  | 0.9330443  | -1.0161944 |
| H         | 1.4607692  | 0.5768183  | -1.9813224 |
| H         | 1.4948992  | 1.9339853  | -0.8479104 |
| N         | -0.9345658 | -0.0337427 | -0.0251034 |
| N         | 1.5736782  | 0.0385763  | 0.0287246  |
| H         | -2.1439108 | -0.0471377 | -0.0359814 |
| Br        | -3.8820908 | 0.0030673  | 0.0022736  |
| <b>c1</b> |            |            |            |
| Ni        | -0.1565816 | 0.3438015  | -0.4478461 |
| Br        | -1.0957166 | 1.8861825  | 1.1595589  |
| C         | -4.0073276 | 1.1647145  | -1.0209641 |
| C         | -4.4089916 | -0.1352695 | -0.3321541 |
| C         | -3.0717956 | -0.6353435 | 0.1968309  |
| C         | -2.7058816 | 0.7930935  | -1.7174281 |
| H         | -4.7604956 | 1.5455715  | -1.7196631 |
| H         | -3.8061976 | 1.9385825  | -0.2681491 |
| H         | -4.8266556 | -0.8446555 | -1.0625851 |
| H         | -5.1483166 | 0.0030665  | 0.4650649  |

|           |            |            |            |
|-----------|------------|------------|------------|
| H         | -2.8172846 | -0.1145625 | 1.1277079  |
| H         | -3.0263096 | -1.7183315 | 0.3633519  |
| H         | -2.0215196 | 1.6402735  | -1.8395941 |
| H         | -2.8813026 | 0.3564235  | -2.7104841 |
| N         | -2.0799606 | -0.2541635 | -0.8432991 |
| H         | -1.8767586 | -1.0661145 | -1.4274961 |
| C         | 1.8226984  | -2.3206865 | 2.2413319  |
| C         | 1.1307434  | -3.2114555 | 1.2160409  |
| C         | -0.1895456 | -2.4897545 | 0.9785529  |
| C         | 1.4972894  | -0.9368445 | 1.7012339  |
| H         | 1.3758374  | -2.4624515 | 3.2370629  |
| H         | 2.9006984  | -2.5003405 | 2.3254499  |
| H         | 0.9903344  | -4.2469785 | 1.5454529  |
| H         | 1.7076204  | -3.2261375 | 0.2795479  |
| H         | -0.5842666 | -2.6717945 | -0.0272801 |
| H         | -0.9447116 | -2.7917345 | 1.7197619  |
| H         | 2.1852084  | -0.6844675 | 0.8813109  |
| H         | 1.5398164  | -0.1249055 | 2.4365889  |
| N         | 0.1178734  | -1.0426995 | 1.1556719  |
| H         | -0.5264706 | -0.6228445 | 1.8249309  |
| Br        | 0.3887714  | -1.2690945 | -2.1920011 |
| N         | 1.3168474  | 1.3674135  | -0.7888291 |
| C         | 1.7166034  | 2.5241315  | 0.0126539  |
| H         | 0.9111674  | 3.2641015  | 0.0368889  |
| C         | 3.0149524  | 3.0061565  | -0.6156001 |
| H         | 3.5772924  | 3.6773045  | 0.0440679  |
| H         | 2.8031114  | 3.5422115  | -1.5520431 |
| C         | 3.7084944  | 1.6854805  | -0.9026371 |
| H         | 4.1419214  | 1.2846415  | 0.0270999  |
| H         | 4.5131124  | 1.7473665  | -1.6444011 |
| C         | 2.5502194  | 0.8080145  | -1.3665381 |
| H         | 2.6827454  | -0.2489045 | -1.0977361 |
| H         | 2.4366454  | 0.8112675  | -2.4625321 |
| H         | 1.9060874  | 2.2297365  | 1.0630989  |
| <b>c2</b> |            |            |            |
| Ni        | -0.5762015 | 0.1600154  | -0.7031251 |
| C         | 1.9545515  | 2.3791334  | -0.1693561 |
| C         | 1.3567585  | 2.3119584  | 1.2529169  |
| C         | -0.1115755 | 2.6863304  | 1.0686059  |
| C         | 0.7669405  | 2.7114304  | -1.0763691 |
| H         | 2.7441585  | 3.1336464  | -0.2583981 |

|             |            |            |            |
|-------------|------------|------------|------------|
| H           | 2.3869955  | 1.4089914  | -0.4445821 |
| H           | 1.8581415  | 2.9795374  | 1.9625679  |
| H           | 1.4411455  | 1.2917864  | 1.6512949  |
| H           | -0.7874555 | 2.2027734  | 1.7856729  |
| H           | -0.2483555 | 3.7782934  | 1.1593499  |
| H           | 0.7939435  | 2.2137824  | -2.0547181 |
| H           | 0.6986225  | 3.7989054  | -1.2495611 |
| N           | -0.3980165 | 2.2438774  | -0.3010101 |
| H           | -1.2697455 | 2.6223734  | -0.6746831 |
| C           | -3.1108845 | -1.9831546 | 0.1545199  |
| C           | -3.8058505 | -0.7065156 | 0.6590279  |
| C           | -2.7213645 | 0.0714854  | 1.4160839  |
| C           | -1.7899795 | -2.0201426 | 0.9057149  |
| H           | -3.7010225 | -2.8905906 | 0.3240059  |
| H           | -2.9195705 | -1.8917266 | -0.9220251 |
| H           | -4.6508035 | -0.9275386 | 1.3219209  |
| H           | -4.1787825 | -0.1222946 | -0.1891441 |
| H           | -2.6878825 | 1.1320914  | 1.1361339  |
| H           | -2.8756155 | 0.0083064  | 2.5057709  |
| H           | -0.9922925 | -2.5418716 | 0.3654669  |
| H           | -1.9126975 | -2.4797756 | 1.9020209  |
| N           | -1.4459165 | -0.5870076 | 1.0470089  |
| H           | -0.7456665 | -0.4598756 | 1.7777059  |
| Br          | -2.2975475 | 0.6013874  | -2.3229621 |
| N           | 0.9406435  | -0.8829776 | -0.7410901 |
| C           | 1.7080805  | -0.9589586 | -1.9772751 |
| H           | 1.0390705  | -1.0711946 | -2.8430971 |
| C           | 2.6619755  | -2.1316656 | -1.7784331 |
| H           | 3.5280485  | -2.1103436 | -2.4510171 |
| H           | 2.1266485  | -3.0789396 | -1.9392651 |
| C           | 3.0243555  | -1.9724206 | -0.3065311 |
| H           | 3.7691175  | -1.1689406 | -0.1956671 |
| H           | 3.4418335  | -2.8766066 | 0.1527539  |
| C           | 1.6917375  | -1.5405296 | 0.3141689  |
| H           | 1.8478725  | -0.8760446 | 1.1860969  |
| H           | 1.1454635  | -2.4233776 | 0.7017739  |
| H           | 2.3011235  | -0.0336116 | -2.1522721 |
| <b>TSc2</b> |            |            |            |
| Ni          | -0.8597719 | 0.1082457  | 0.2552444  |
| Br          | -1.4504979 | -0.5139603 | 2.5132254  |
| C           | 1.0406261  | -3.3611173 | -1.0277446 |

|   |            |            |            |
|---|------------|------------|------------|
| C | 1.9737511  | -3.0819033 | 0.1431994  |
| C | 1.2282491  | -1.9608593 | 0.8551104  |
| C | 0.5977441  | -1.9518373 | -1.4186226 |
| H | 1.5091681  | -3.9050753 | -1.8576036 |
| H | 0.1787381  | -3.9539773 | -0.6824706 |
| H | 2.9460061  | -2.7192883 | -0.2219646 |
| H | 2.1541461  | -3.9541273 | 0.7828544  |
| H | 0.4462971  | -2.3685613 | 1.5174424  |
| H | 1.8694081  | -1.3332793 | 1.4955824  |
| H | -0.3922549 | -1.9376403 | -1.9005116 |
| H | 1.2993181  | -1.5529503 | -2.1758486 |
| N | 0.6401291  | -1.1365773 | -0.2020256 |
| C | -1.8664209 | 4.2390687  | -0.3323656 |
| C | -1.3588929 | 4.3403327  | 1.1026024  |
| C | -0.7648119 | 2.9573077  | 1.3051064  |
| C | -2.4115549 | 2.8097737  | -0.4180786 |
| H | -2.6212249 | 4.9902207  | -0.5904746 |
| H | -1.0247009 | 4.3583087  | -1.0289396 |
| H | -2.1922589 | 4.5057607  | 1.8019624  |
| H | -0.6297489 | 5.1451507  | 1.2486374  |
| H | 0.1945651  | 2.8853797  | 0.7740104  |
| H | -0.6132499 | 2.6485027  | 2.3454964  |
| H | -2.2186339 | 2.3501277  | -1.3972466 |
| H | -3.4957419 | 2.7795607  | -0.2468726 |
| N | -1.7289859 | 2.0302777  | 0.6543824  |
| H | -2.4060919 | 1.7635417  | 1.3703064  |
| C | -4.7458869 | -1.3869313 | -0.3736896 |
| C | -3.8501889 | -2.4199973 | 0.2973034  |
| C | -2.5293959 | -2.2385093 | -0.4313676 |
| C | -3.8050049 | -0.1978253 | -0.4824126 |
| H | -5.0540049 | -1.7320713 | -1.3722596 |
| H | -5.6514259 | -1.1509063 | 0.1965514  |
| H | -4.2257189 | -3.4465653 | 0.2254714  |
| H | -3.7120119 | -2.1716543 | 1.3589854  |
| H | -1.6618599 | -2.5296173 | 0.1684344  |
| H | -2.5149639 | -2.8110573 | -1.3706426 |
| H | -3.7722789 | 0.3308897  | 0.4791574  |
| H | -4.0671479 | 0.5225407  | -1.2660816 |
| N | -2.4538949 | -0.7713543 | -0.7473476 |
| H | -2.2317309 | -0.6556963 | -1.7360516 |
| C | 4.6905721  | 0.3252437  | 0.3245704  |
| C | 4.3857971  | -0.0718333 | -0.9768766 |

|    |           |            |            |
|----|-----------|------------|------------|
| C  | 3.0914141 | 0.0090177  | -1.4626466 |
| C  | 2.0559581 | 0.4175147  | -0.6043956 |
| C  | 2.3707531 | 0.9047007  | 0.6766434  |
| C  | 3.6735591 | 0.8254557  | 1.1372544  |
| H  | 5.1839651 | -0.4193473 | -1.6329156 |
| H  | 2.8793151 | -0.2376243 | -2.5005236 |
| H  | 1.5853641 | 1.2599767  | 1.3440564  |
| H  | 3.9014401 | 1.1563877  | 2.1483614  |
| C  | 6.1050151 | 0.2586157  | 0.7806094  |
| F  | 6.9016071 | 1.0777337  | 0.0711414  |
| F  | 6.6199331 | -0.9736373 | 0.6299904  |
| F  | 6.2436251 | 0.5937827  | 2.0690584  |
| Br | 0.5438921 | 1.3523627  | -1.6147736 |

**c3**

|    |            |            |            |
|----|------------|------------|------------|
| Ni | -0.7520710 | 0.2767633  | 0.0538776  |
| Br | -1.3297640 | -0.1644747 | 2.3965996  |
| C  | 0.4090460  | -3.8849717 | -1.3323944 |
| C  | 0.5150300  | -4.1282937 | 0.1853446  |
| C  | -0.0852470 | -2.8699167 | 0.8105476  |
| C  | -0.1096070 | -2.4469567 | -1.4421264 |
| H  | 1.3864150  | -3.9948287 | -1.8186684 |
| H  | -0.2736460 | -4.5860347 | -1.8264954 |
| H  | 1.5658530  | -4.2273417 | 0.4885326  |
| H  | -0.0049060 | -5.0342257 | 0.5167246  |
| H  | -1.1778910 | -2.9372137 | 0.8826586  |
| H  | 0.2864590  | -2.6343387 | 1.8083906  |
| H  | -1.2072190 | -2.4360437 | -1.4986294 |
| H  | 0.2425050  | -1.8601497 | -2.2917214 |
| N  | 0.2295050  | -1.7834707 | -0.1599594 |
| C  | 0.3373470  | 4.2301803  | -0.5590604 |
| C  | 1.2194810  | 3.9540493  | 0.6528476  |
| C  | 0.9543450  | 2.4774863  | 0.8938766  |
| C  | -0.9269580 | 3.4253093  | -0.2687714 |
| H  | 0.1282530  | 5.2936693  | -0.7211524 |
| H  | 0.8147780  | 3.8320623  | -1.4650534 |
| H  | 0.8885320  | 4.5484813  | 1.5181956  |
| H  | 2.2799360  | 4.1697313  | 0.4796856  |
| H  | 1.5350760  | 1.8652853  | 0.1868866  |
| H  | 1.1692800  | 2.1223163  | 1.9086906  |
| H  | -1.3764260 | 3.0336393  | -1.1872174 |
| H  | -1.6757050 | 4.0229933  | 0.2703336  |

|    |            |            |            |
|----|------------|------------|------------|
| N  | -0.4981060 | 2.2930113  | 0.6051136  |
| H  | -0.9987410 | 2.3268453  | 1.4933246  |
| C  | -4.9524150 | 0.6422483  | 0.0124266  |
| C  | -4.6018430 | -0.7337877 | 0.5657076  |
| C  | -3.4254250 | -1.1512277 | -0.3046504 |
| C  | -3.5731120 | 1.2467143  | -0.2010594 |
| H  | -5.4874420 | 0.5482393  | -0.9446624 |
| H  | -5.5723310 | 1.2414493  | 0.6888956  |
| H  | -5.4274320 | -1.4530737 | 0.5273676  |
| H  | -4.2613820 | -0.6455487 | 1.6069326  |
| H  | -2.7545780 | -1.8490627 | 0.2078466  |
| H  | -3.7673730 | -1.6169047 | -1.2410204 |
| H  | -3.1884220 | 1.6427873  | 0.7483266  |
| H  | -3.5333480 | 2.0433523  | -0.9527324 |
| N  | -2.7042430 | 0.1139213  | -0.6232494 |
| H  | -2.5233990 | 0.1767873  | -1.6263104 |
| C  | 4.1569200  | -0.2521577 | 0.3071856  |
| C  | 3.7431530  | -0.7142597 | -0.9394724 |
| C  | 2.4770720  | -1.2498257 | -1.1092114 |
| C  | 1.5909850  | -1.3227297 | -0.0289574 |
| C  | 2.0138200  | -0.8528487 | 1.2207126  |
| C  | 3.2878630  | -0.3278367 | 1.3874666  |
| H  | 4.4219840  | -0.6529067 | -1.7888094 |
| H  | 2.1827260  | -1.5901297 | -2.0967344 |
| H  | 1.3176570  | -0.8481647 | 2.0582416  |
| H  | 3.5959140  | 0.0393133  | 2.3637386  |
| C  | 5.5302290  | 0.3215513  | 0.4352606  |
| F  | 5.6973000  | 1.3736893  | -0.3793054 |
| F  | 6.4692330  | -0.5732597 | 0.0950636  |
| F  | 5.7982490  | 0.7313753  | 1.6791006  |
| Br | -0.0559130 | 0.8287313  | -2.2484784 |

### **TSc3**

|    |            |            |            |
|----|------------|------------|------------|
| Ni | -0.0535827 | -0.1318237 | 0.1340704  |
| Br | -0.6624577 | -0.0879067 | -2.2327756 |
| C  | 1.0307153  | -4.3621357 | 0.5613844  |
| C  | -0.1338137 | -4.5117947 | -0.4102916 |
| C  | -0.2874137 | -3.0868247 | -0.9318496 |
| C  | 0.7234903  | -3.0037307 | 1.1836894  |
| H  | 1.1102223  | -5.1671497 | 1.3001984  |
| H  | 1.9819023  | -4.3169597 | 0.0082354  |
| H  | -1.0416387 | -4.8142657 | 0.1345164  |

|   |            |            |            |
|---|------------|------------|------------|
| H | 0.0378193  | -5.2449507 | -1.2056836 |
| H | 0.3952713  | -2.8844887 | -1.7792806 |
| H | -1.2812557 | -2.8057857 | -1.3046636 |
| H | 1.5838783  | -2.4676347 | 1.6111744  |
| H | 0.0041503  | -3.1067957 | 2.0188794  |
| N | 0.0972043  | -2.2036957 | 0.1500774  |
| C | 0.2976163  | 4.3979993  | 0.8898574  |
| C | 0.4153673  | 4.3257983  | -0.6315546 |
| C | -0.1461297 | 2.9470243  | -0.9350076 |
| C | 0.4645533  | 2.9381043  | 1.3518164  |
| H | 1.0281663  | 5.0726873  | 1.3512204  |
| H | -0.6998947 | 4.7661743  | 1.1689044  |
| H | 1.4718093  | 4.3704133  | -0.9420286 |
| H | -0.1138607 | 5.1360073  | -1.1466736 |
| H | -1.2437937 | 2.9324563  | -0.8641696 |
| H | 0.1095273  | 2.5288233  | -1.9123956 |
| H | -0.3204447 | 2.6404963  | 2.0565184  |
| H | 1.4164513  | 2.7539993  | 1.8671584  |
| N | 0.4008433  | 2.0815663  | 0.1351334  |
| H | 1.3634033  | 1.8823783  | -0.1326006 |
| C | 4.6220183  | 0.1212573  | -0.0413976 |
| C | 4.2843433  | -0.0131757 | -1.5343206 |
| C | 2.7950393  | 0.3042133  | -1.5841366 |
| C | 3.2621833  | -0.0404237 | 0.6771094  |
| H | 5.3558933  | -0.6248357 | 0.2851114  |
| H | 5.0549323  | 1.1063103  | 0.1753034  |
| H | 4.4489373  | -1.0451627 | -1.8775796 |
| H | 4.8900423  | 0.6409943  | -2.1721966 |
| H | 2.6357403  | 1.3967493  | -1.5457416 |
| H | 2.2405943  | -0.0627647 | -2.4540566 |
| H | 2.9834483  | 0.8819643  | 1.2111424  |
| H | 3.2494433  | -0.8419177 | 1.4260524  |
| N | 2.2452173  | -0.2993117 | -0.3579036 |
| H | 2.1931383  | -1.3048517 | -0.5297976 |
| C | -4.5520667 | -0.0629067 | 0.1242994  |
| C | -3.8807417 | 1.1358373  | 0.3653384  |
| C | -2.5842037 | 1.1281773  | 0.8479914  |
| C | -1.9275307 | -0.0952787 | 1.0191094  |
| C | -2.6304947 | -1.2971217 | 0.8890214  |
| C | -3.9300147 | -1.2753077 | 0.4064224  |
| H | -4.3835187 | 2.0829643  | 0.1723944  |
| H | -2.0669127 | 2.0640763  | 1.0400054  |

|    |            |            |            |
|----|------------|------------|------------|
| H  | -2.1467607 | -2.2459157 | 1.1125654  |
| H  | -4.4669017 | -2.2084387 | 0.2510214  |
| C  | -5.9600097 | -0.0021317 | -0.3659386 |
| F  | -6.0718767 | 0.7758823  | -1.4509046 |
| F  | -6.7800997 | 0.5238363  | 0.5597144  |
| F  | -6.4442707 | -1.2082337 | -0.6819636 |
| Br | -0.3836767 | -0.1124707 | 2.5394754  |

**c4**

|    |            |            |            |
|----|------------|------------|------------|
| Ni | 0.5605569  | -0.1222835 | -0.0420652 |
| Br | 0.7971999  | -0.7908515 | 2.4925888  |
| C  | -0.0905421 | 4.1000555  | 0.2554988  |
| C  | -0.8397081 | 3.5675765  | 1.4685508  |
| C  | -0.1028451 | 2.2631845  | 1.7311198  |
| C  | 0.1415359  | 2.8255715  | -0.5467172 |
| H  | -0.6360331 | 4.8597375  | -0.3142932 |
| H  | 0.8722529  | 4.5351395  | 0.5638678  |
| H  | -1.8861271 | 3.3459335  | 1.2057058  |
| H  | -0.8383101 | 4.2396475  | 2.3331848  |
| H  | 0.8401659  | 2.4344175  | 2.2849138  |
| H  | -0.6436811 | 1.5056235  | 2.3046668  |
| H  | 1.0020959  | 2.8230085  | -1.2262292 |
| H  | -0.7313561 | 2.5876535  | -1.1793312 |
| N  | 0.2677189  | 1.7504135  | 0.4236088  |
| C  | -1.4432171 | -3.3410015 | -0.5186202 |
| C  | -0.5195151 | -3.6568105 | 0.6748138  |
| C  | 0.8625479  | -3.2086695 | 0.2215128  |
| C  | -0.5485511 | -2.6182685 | -1.5233752 |
| H  | -1.8742241 | -4.2441905 | -0.9656292 |
| H  | -2.2795081 | -2.7015175 | -0.2104802 |
| H  | -0.5265181 | -4.7158195 | 0.9556438  |
| H  | -0.8026481 | -3.0753095 | 1.5610758  |
| H  | 1.4941319  | -2.8723565 | 1.0485958  |
| H  | 1.3783759  | -4.0093255 | -0.3359482 |
| H  | -1.0352531 | -1.8122675 | -2.0770432 |
| H  | -0.1373551 | -3.3277555 | -2.2594912 |
| N  | 0.5811939  | -2.0944225 | -0.7143032 |
| H  | 1.3665469  | -1.9424815 | -1.3487362 |
| C  | 4.7752419  | 0.9847665  | 0.2458648  |
| C  | 4.9862719  | -0.3436775 | -0.4946332 |
| C  | 3.5808989  | -0.9771125 | -0.5728512 |
| C  | 3.2913029  | 1.2545635  | 0.0485708  |



|    |            |            |            |
|----|------------|------------|------------|
| H  | 4.9885149  | 0.8680015  | 1.3180578  |
| H  | 5.4116219  | 1.7930365  | -0.1319912 |
| H  | 5.7050209  | -0.9904515 | 0.0209718  |
| H  | 5.3753929  | -0.1701895 | -1.5053242 |
| H  | 3.2373709  | -1.0155285 | -1.6147032 |
| H  | 3.5287189  | -1.9826645 | -0.1374962 |
| H  | 3.0782989  | 1.6254765  | -0.9640142 |
| H  | 2.8482069  | 1.9398915  | 0.7831528  |
| N  | 2.6666589  | -0.0767495 | 0.1659048  |
| H  | 2.6851289  | -0.3385965 | 1.1575538  |
| C  | -4.2048371 | 0.0674195  | -0.1833702 |
| C  | -3.5562621 | -0.2464885 | 1.0080688  |
| C  | -2.1670381 | -0.2806305 | 1.0657828  |
| C  | -1.4267381 | -0.0035595 | -0.0821032 |
| C  | -2.0680231 | 0.3321975  | -1.2693592 |
| C  | -3.4612451 | 0.3569635  | -1.3197482 |
| H  | -4.1406041 | -0.4739685 | 1.8994288  |
| H  | -1.6689921 | -0.5406265 | 1.9972768  |
| H  | -1.4894041 | 0.5584155  | -2.1636482 |
| H  | -3.9626451 | 0.6087665  | -2.2517552 |
| C  | -5.6999841 | 0.0888195  | -0.1939712 |
| F  | -6.1805881 | 0.9711785  | 0.6943108  |
| F  | -6.2071131 | -1.1050085 | 0.1440758  |
| F  | -6.1986051 | 0.4125995  | -1.3905632 |
| Br | 1.0444989  | 0.3785245  | -2.5365722 |

#### **TSc4**

|    |            |            |            |
|----|------------|------------|------------|
| Ni | 0.6338806  | 0.0827027  | 0.0465756  |
| Br | 0.8371746  | 1.2994237  | -2.2551534 |
| C  | -1.0495964 | -3.7164253 | -0.8766114 |
| C  | -1.4933214 | -2.8038893 | -2.0254804 |
| C  | -0.3427164 | -1.8162183 | -2.1493684 |
| C  | -0.0197774 | -2.8798413 | -0.1021474 |
| H  | -1.8882614 | -4.0108163 | -0.2354594 |
| H  | -0.5916034 | -4.6382103 | -1.2563044 |
| H  | -2.4092964 | -2.2577773 | -1.7597414 |
| H  | -1.6854524 | -3.3422653 | -2.9598014 |
| H  | 0.5110536  | -2.2631863 | -2.6964374 |
| H  | -0.5564084 | -0.8652803 | -2.6420114 |
| H  | 0.9829466  | -3.3431563 | -0.0998544 |
| H  | -0.2473734 | -2.7076873 | 0.9537716  |
| N  | 0.1341846  | -1.6093463 | -0.7928974 |

|   |            |            |            |
|---|------------|------------|------------|
| C | -1.0098274 | 3.4568917  | 0.6081836  |
| C | 0.2994636  | 3.9602267  | -0.0254544 |
| C | 1.3936576  | 3.0571877  | 0.5483536  |
| C | -0.5599014 | 2.4707627  | 1.6736596  |
| H | -1.6197264 | 4.2603737  | 1.0361306  |
| H | -1.6233454 | 2.9425517  | -0.1418494 |
| H | 0.4992816  | 5.0115437  | 0.2124726  |
| H | 0.2676036  | 3.8568907  | -1.1154234 |
| H | 2.1075276  | 2.7372417  | -0.2161674 |
| H | 1.9432606  | 3.5615247  | 1.3600586  |
| H | -1.2883414 | 1.6884617  | 1.9097386  |
| H | -0.3119464 | 2.9988627  | 2.6096816  |
| N | 0.6828706  | 1.8858937  | 1.1173176  |
| H | 1.2119436  | 1.4750687  | 1.8903656  |
| C | 4.7251536  | -1.2669963 | -0.3752524 |
| C | 4.8674166  | -0.4122033 | 0.8807136  |
| C | 3.7104506  | 0.5894537  | 0.7785986  |
| C | 3.2143056  | -1.3581273 | -0.4983864 |
| H | 5.1471486  | -0.7513533 | -1.2511254 |
| H | 5.2108366  | -2.2461433 | -0.2914244 |
| H | 5.8420746  | 0.0806127  | 0.9692836  |
| H | 4.7269116  | -1.0409973 | 1.7708556  |
| H | 3.2308306  | 0.7352427  | 1.7523016  |
| H | 4.0385396  | 1.5651687  | 0.3976146  |
| H | 2.8115256  | -2.0391143 | 0.2639646  |
| H | 2.8391356  | -1.6567353 | -1.4860474 |
| N | 2.7334436  | 0.0069037  | -0.1872844 |
| H | 2.7732546  | 0.5441697  | -1.0575684 |
| C | -4.1554974 | -0.0055673 | 0.2962766  |
| C | -3.5180554 | 0.5840357  | -0.7930214 |
| C | -2.1343984 | 0.5253387  | -0.9143654 |
| C | -1.3926564 | -0.1035683 | 0.0836776  |
| C | -2.0199904 | -0.7105813 | 1.1663216  |
| C | -3.4081274 | -0.6511373 | 1.2735766  |
| H | -4.1067474 | 1.0935677  | -1.5553374 |
| H | -1.6370254 | 0.9983547  | -1.7591114 |
| H | -1.4346944 | -1.1842753 | 1.9518346  |
| H | -3.9031284 | -1.1092113 | 2.1269136  |
| C | -5.6492804 | 0.0527467  | 0.3618546  |
| F | -6.2046634 | -0.6381793 | -0.6441594 |
| F | -6.0927834 | 1.3118527  | 0.2510546  |
| F | -6.1302144 | -0.4463433 | 1.5037376  |

|    |           |            |           |
|----|-----------|------------|-----------|
| Br | 1.1082806 | -0.9584203 | 2.3683576 |
|----|-----------|------------|-----------|

**c2-CH<sub>3</sub>**

|    |            |            |            |
|----|------------|------------|------------|
| Ni | -1.5161201 | -0.6306840 | 0.3003404  |
| Br | -3.2659791 | -1.5505250 | 1.6927254  |
| C  | 0.3708349  | -1.5747640 | -3.3617866 |
| C  | 0.7058789  | -2.6923930 | -2.3666666 |
| C  | -0.4639701 | -2.6488820 | -1.3808296 |
| C  | -0.5566471 | -0.6223060 | -2.5726966 |
| H  | 1.2705979  | -1.0650510 | -3.7287276 |
| H  | -0.1455991 | -1.9782980 | -4.2424826 |
| H  | 1.6436769  | -2.4661560 | -1.8366526 |
| H  | 0.8296069  | -3.6724770 | -2.8462316 |
| H  | -0.1763231 | -3.0356810 | -0.3861696 |
| H  | -1.5108321 | -0.4775870 | -3.1168676 |
| H  | -0.1154811 | 0.3856070  | -2.4664586 |
| N  | -0.7632881 | -1.2240350 | -1.2682736 |
| C  | 1.7090759  | 0.5151580  | 2.9752844  |
| C  | 1.6187779  | -0.9857110 | 3.2429684  |
| C  | 0.6390739  | -1.4372650 | 2.1709234  |
| C  | 0.2873089  | 0.9117060  | 2.5323314  |
| H  | 2.0372179  | 1.0920860  | 3.8494734  |
| H  | 2.4284669  | 0.7066130  | 2.1665314  |
| H  | 1.1989089  | -1.1807010 | 4.2413184  |
| H  | 2.5899759  | -1.4922040 | 3.1828804  |
| H  | 1.1447639  | -1.5186680 | 1.1957704  |
| H  | 0.1348689  | -2.3918220 | 2.3673984  |
| H  | 0.3351209  | 1.5945360  | 1.6693564  |
| N  | -0.3685271 | -0.3566890 | 2.0961434  |
| H  | -1.1182191 | -0.5858610 | 2.7550284  |
| C  | -3.4291481 | 3.2014420  | -0.0217226 |
| C  | -4.2715071 | 2.3726160  | -0.9831206 |
| C  | -3.3490901 | 1.2242620  | -1.4295296 |
| C  | -2.6365711 | 2.1129330  | 0.6811054  |
| H  | -2.7434171 | 3.8668250  | -0.5715896 |
| H  | -4.0235721 | 3.8201010  | 0.6605644  |
| H  | -4.6648571 | 2.9414290  | -1.8338106 |
| H  | -5.1323861 | 1.9495440  | -0.4427646 |
| H  | -2.8685961 | 1.4790480  | -2.3875116 |
| H  | -3.2652621 | 1.5616890  | 1.3970844  |
| H  | -1.7374851 | 2.4606250  | 1.2073614  |
| N  | -2.2486801 | 1.1811780  | -0.3985706 |

|    |            |            |            |
|----|------------|------------|------------|
| H  | -1.4120821 | 1.5668440  | -0.8358666 |
| C  | 4.5905909  | 0.0873870  | -0.0939736 |
| C  | 4.6984219  | 1.4773130  | -0.0907676 |
| C  | 3.5811999  | 2.2601130  | -0.3394926 |
| C  | 2.3657839  | 1.6305460  | -0.5874756 |
| C  | 2.2349679  | 0.2499070  | -0.5942096 |
| C  | 3.3676109  | -0.5217720 | -0.3446416 |
| H  | 5.6616329  | 1.9446980  | 0.1074614  |
| H  | 3.6471159  | 3.3454300  | -0.3406926 |
| H  | 1.2627859  | -0.2261270 | -0.7610796 |
| H  | 3.2897989  | -1.6077810 | -0.3399086 |
| C  | 5.8195489  | -0.7157660 | 0.2039054  |
| F  | 6.2591119  | -0.4753000 | 1.4464294  |
| F  | 6.8192319  | -0.3955230 | -0.6264386 |
| F  | 5.6064059  | -2.0287540 | 0.0977604  |
| Br | 0.8420999  | 2.7236830  | -0.9022696 |
| C  | -4.0820961 | -0.0915550 | -1.5705516 |
| H  | -4.8985681 | 0.0164950  | -2.2979726 |
| H  | -3.4106801 | -0.8924290 | -1.9039736 |
| H  | -4.5053051 | -0.4029180 | -0.6063916 |
| C  | -0.5202021 | 1.5480200  | 3.6483604  |
| H  | -0.1400471 | 2.5482430  | 3.8905234  |
| H  | -1.5803051 | 1.6415170  | 3.3750654  |
| H  | -0.4653021 | 0.9345450  | 4.5600424  |
| C  | -1.6688661 | -3.4499820 | -1.8661326 |
| H  | -1.4311221 | -4.5206610 | -1.9363026 |
| H  | -2.5102351 | -3.3244820 | -1.1723716 |
| H  | -1.9940911 | -3.1113270 | -2.8611636 |

### **TSc2-CH<sub>3</sub>**

|    |            |            |            |
|----|------------|------------|------------|
| Ni | -0.7854787 | 0.0273039  | 0.4011564  |
| Br | -1.7401227 | -0.2830911 | 2.5879034  |
| C  | 2.1434433  | -3.0184781 | -0.6638596 |
| C  | 2.7337403  | -2.5260651 | 0.6643894  |
| C  | 1.5626183  | -1.7843661 | 1.3216734  |
| C  | 0.8765163  | -2.1605431 | -0.8675176 |
| H  | 2.8548013  | -2.8979841 | -1.4898616 |
| H  | 1.8845093  | -4.0843821 | -0.6185756 |
| H  | 3.5804523  | -1.8523111 | 0.4924204  |
| H  | 3.0951263  | -3.3485761 | 1.2950854  |
| H  | 1.9048653  | -0.9813441 | 1.9956984  |
| H  | -0.0195397 | -2.8031411 | -0.8193606 |

|   |            |            |            |
|---|------------|------------|------------|
| H | 0.8511823  | -1.6653241 | -1.8539376 |
| N | 0.8634553  | -1.1565131 | 0.1903464  |
| C | -1.2717097 | 4.3913129  | -0.1473486 |
| C | -0.8727597 | 4.3383709  | 1.3223514  |
| C | -0.5598917 | 2.8613639  | 1.4798744  |
| C | -2.1042217 | 3.1144049  | -0.3361886 |
| H | -1.8351887 | 5.2906279  | -0.4265576 |
| H | -0.3698337 | 4.3508809  | -0.7744616 |
| H | -1.7110957 | 4.6305929  | 1.9723234  |
| H | -0.0203287 | 4.9833189  | 1.5644074  |
| H | 0.4206743  | 2.6576679  | 1.0262964  |
| H | -0.5559767 | 2.4763989  | 2.5052164  |
| H | -1.9269847 | 2.6918589  | -1.3380176 |
| N | -1.5953757 | 2.1477419  | 0.6868454  |
| H | -2.3520507 | 1.9000679  | 1.3285984  |
| C | -4.2158357 | -0.8228761 | -2.0828596 |
| C | -4.0702757 | -2.2231691 | -1.5014286 |
| C | -2.6351897 | -2.2861041 | -0.9361686 |
| C | -3.3311467 | -0.0196981 | -1.1476636 |
| H | -3.8166487 | -0.7727681 | -3.1074096 |
| H | -5.2524927 | -0.4682481 | -2.1112346 |
| H | -4.2613697 | -3.0219931 | -2.2271166 |
| H | -4.7859467 | -2.3550881 | -0.6762756 |
| H | -1.9828407 | -2.8502391 | -1.6178376 |
| H | -3.8096547 | 0.1081809  | -0.1644686 |
| H | -3.0395957 | 0.9662129  | -1.5253416 |
| N | -2.1284647 | -0.8589341 | -0.9546356 |
| H | -1.5757917 | -0.7668191 | -1.8101106 |
| C | 4.9433023  | 0.5556369  | -0.0165746 |
| C | 4.4964993  | 0.0010609  | -1.2157926 |
| C | 3.1444833  | -0.0733401 | -1.5045146 |
| C | 2.2070453  | 0.3553829  | -0.5488876 |
| C | 2.6531183  | 0.9847199  | 0.6248234  |
| C | 4.0086133  | 1.0488329  | 0.8947624  |
| H | 5.2217743  | -0.3531851 | -1.9480616 |
| H | 2.8072583  | -0.4604521 | -2.4640286 |
| H | 1.9329153  | 1.3513269  | 1.3554794  |
| H | 4.3465453  | 1.4947309  | 1.8278934  |
| C | 6.4043053  | 0.5796539  | 0.2639994  |
| F | 7.1022873  | 1.0988009  | -0.7599116 |
| F | 6.8952873  | -0.6572901 | 0.4555894  |
| F | 6.7042163  | 1.2946119  | 1.3552424  |

|    |            |            |            |
|----|------------|------------|------------|
| Br | 0.5678593  | 1.1860809  | -1.4786856 |
| C  | -2.5995527 | -2.9212221 | 0.4337204  |
| H  | -3.0712367 | -3.9120551 | 0.3825284  |
| H  | -1.5778207 | -3.0409101 | 0.8067154  |
| H  | -3.1439537 | -2.3118471 | 1.1659084  |
| C  | -3.5874517 | 3.3780739  | -0.1421986 |
| H  | -3.9819737 | 3.9995529  | -0.9559296 |
| H  | -4.1728597 | 2.4498939  | -0.1141656 |
| H  | -3.7652227 | 3.9104209  | 0.8032614  |
| C  | 0.7273183  | -2.7747601 | 2.1278084  |
| H  | 1.3242093  | -3.1510641 | 2.9700874  |
| H  | -0.1802057 | -2.3149371 | 2.5287994  |
| H  | 0.4476633  | -3.6459671 | 1.5157844  |

**c3-CH<sub>3</sub>**

|    |            |            |            |
|----|------------|------------|------------|
| Ni | -0.3863219 | -0.8389480 | 0.0651014  |
| Br | 0.1030361  | 0.0335710  | -2.0599786 |
| C  | -0.7958239 | 4.5887220  | 1.9248934  |
| C  | -1.1896859 | 4.8016170  | 0.4726874  |
| C  | -0.0708709 | 4.1291700  | -0.3244986 |
| C  | -0.2163999 | 3.1811260  | 1.9109454  |
| H  | -0.0153439 | 5.3067340  | 2.2152424  |
| H  | -1.6302769 | 4.6980210  | 2.6269084  |
| H  | -1.3204749 | 5.8537140  | 0.1928954  |
| H  | -2.1384319 | 4.2816720  | 0.2623834  |
| H  | 0.7549731  | 4.8513190  | -0.4810596 |
| H  | -0.9875899 | 2.4066850  | 2.0691774  |
| H  | 0.5433931  | 3.0381350  | 2.6910074  |
| N  | 0.3847211  | 3.0670450  | 0.5810944  |
| C  | 1.6152401  | -3.6793800 | 1.5058564  |
| C  | 2.6729061  | -3.3965810 | 0.4435024  |
| C  | 1.9726781  | -2.4144430 | -0.4859686 |
| C  | 0.3142471  | -3.7298410 | 0.7108184  |
| H  | 1.7897131  | -4.6042370 | 2.0692164  |
| H  | 1.5546201  | -2.8460100 | 2.2209204  |
| H  | 2.9505601  | -4.3174630 | -0.0883486 |
| H  | 3.5961431  | -2.9686870 | 0.8520564  |
| H  | 2.1947301  | -1.3780970 | -0.2054936 |
| H  | 2.2454631  | -2.5132320 | -1.5414876 |
| H  | -0.5367399 | -3.4625560 | 1.3527064  |
| N  | 0.5007951  | -2.6485560 | -0.3026226 |
| H  | 0.0839021  | -2.9148000 | -1.1953276 |

|    |            |            |            |
|----|------------|------------|------------|
| C  | -4.1644159 | -1.5707260 | -1.7555826 |
| C  | -4.6343869 | -1.0022210 | -0.4159356 |
| C  | -3.3557819 | -0.4467380 | 0.2063054  |
| C  | -2.7249599 | -2.0385220 | -1.4889046 |
| H  | -4.8065819 | -2.3809130 | -2.1183816 |
| H  | -4.1665129 | -0.7902820 | -2.5272656 |
| H  | -5.0387579 | -1.8026850 | 0.2212084  |
| H  | -5.4154869 | -0.2394910 | -0.5233756 |
| H  | -3.3919809 | -0.4149170 | 1.3027314  |
| H  | -2.0262929 | -1.6698380 | -2.2485916 |
| H  | -2.6361629 | -3.1322080 | -1.4389946 |
| N  | -2.3309039 | -1.4718140 | -0.1656396 |
| H  | -2.3906499 | -2.2089380 | 0.5380144  |
| C  | 3.8382741  | 0.7570200  | -0.0204366 |
| C  | 3.0282181  | 0.5592240  | 1.0950504  |
| C  | 1.9018001  | 1.3364270  | 1.2970674  |
| C  | 1.5319441  | 2.3378130  | 0.3768904  |
| C  | 2.3778491  | 2.5493670  | -0.7305256 |
| C  | 3.5000091  | 1.7643170  | -0.9242576 |
| H  | 3.2660161  | -0.2218560 | 1.8178704  |
| H  | 1.2664521  | 1.1186360  | 2.1496274  |
| H  | 2.1496201  | 3.3255880  | -1.4557526 |
| H  | 4.1296711  | 1.9368090  | -1.7957826 |
| C  | 4.9689461  | -0.1612960 | -0.3147786 |
| F  | 4.6198041  | -1.1286950 | -1.1931386 |
| F  | 5.4078751  | -0.8000690 | 0.7816954  |
| F  | 6.0159261  | 0.4717840  | -0.8592266 |
| Br | -0.5864259 | -0.7957930 | 2.4277534  |
| C  | -2.9804409 | 0.9259740  | -0.3184676 |
| H  | -3.7624429 | 1.6502020  | -0.0531836 |
| H  | -2.0337859 | 1.2771290  | 0.1193954  |
| H  | -2.8540709 | 0.9322400  | -1.4092526 |
| C  | 0.0592941  | -5.0683080 | 0.0405514  |
| H  | -0.0906289 | -5.8535420 | 0.7920774  |
| H  | -0.8439539 | -5.0355480 | -0.5862766 |
| H  | 0.9005551  | -5.3685990 | -0.5993226 |
| C  | -0.5703889 | 3.6289180  | -1.6695956 |
| H  | -0.8787799 | 4.4837780  | -2.2871626 |
| H  | 0.1734711  | 3.0474110  | -2.2238796 |
| H  | -1.4410939 | 2.9756620  | -1.5251556 |

**c2-L**

|    |            |            |            |
|----|------------|------------|------------|
| Ni | -0.4905414 | -0.7905666 | 0.0117782  |
| Br | -1.5757804 | -2.9511786 | -0.0387598 |
| C  | -4.2516094 | 0.8144734  | -0.6880018 |
| C  | -4.3499004 | 0.1249684  | 0.6685342  |
| C  | -2.9243684 | 0.2678624  | 1.1934342  |
| C  | -2.8722534 | 0.3631124  | -1.1701378 |
| H  | -5.0562594 | 0.5429264  | -1.3812108 |
| H  | -4.2759214 | 1.9076784  | -0.5582648 |
| H  | -4.5745874 | -0.9426806 | 0.5323902  |
| H  | -5.1064064 | 0.5575664  | 1.3341682  |
| H  | -2.7854904 | 1.2632624  | 1.6646442  |
| H  | -2.6496224 | -0.4863666 | 1.9445102  |
| H  | -2.3820264 | 1.0870294  | -1.8433148 |
| H  | -2.9405594 | -0.5894696 | -1.7269868 |
| N  | -2.0741084 | 0.1414614  | 0.0245542  |
| C  | 2.5242856  | -0.8050556 | -0.0012648 |
| C  | 3.8479806  | -1.2369706 | -0.0058578 |
| C  | 4.1090586  | -2.6008666 | -0.0098328 |
| C  | 3.0443836  | -3.4898826 | -0.0096718 |
| C  | 1.7502046  | -2.9804226 | -0.0052788 |
| N  | 1.4960706  | -1.6710126 | -0.0004628 |
| H  | 5.1361686  | -2.9605726 | -0.0130338 |
| H  | 4.6690766  | -0.5245306 | -0.0053518 |
| H  | 3.2028676  | -4.5651426 | -0.0131688 |
| H  | 0.8610006  | -3.6142496 | -0.0073918 |
| C  | 2.1398246  | 0.6220434  | 0.0038142  |
| C  | 3.0553806  | 1.6730404  | -0.0079008 |
| C  | 0.3658416  | 2.1048774  | 0.0291932  |
| C  | 2.5839976  | 2.9780234  | -0.0006318 |
| H  | 4.1250476  | 1.4808614  | -0.0233738 |
| H  | -0.7203484 | 2.2022224  | 0.0467762  |
| H  | 3.2839316  | 3.8111234  | -0.0098628 |
| C  | 1.2132406  | 3.2045474  | 0.0188082  |
| H  | 0.8040916  | 4.2113594  | 0.0259862  |
| N  | 0.8173316  | 0.8505284  | 0.0211682  |

### **TSc2-L**

|    |            |            |            |
|----|------------|------------|------------|
| Ni | 0.8179252  | -0.2966428 | 0.3958357  |
| Br | 1.0003252  | -0.1758858 | 2.7678367  |
| C  | -0.9600388 | 3.1854222  | -0.6878573 |
| C  | -2.0248368 | 2.8294182  | 0.3414287  |
| C  | -1.3955938 | 1.6179382  | 1.0173877  |



|    |            |            |            |
|----|------------|------------|------------|
| C  | -0.5266678 | 1.8047162  | -1.1754763 |
| H  | -1.3137238 | 3.8327592  | -1.5003813 |
| H  | -0.1248718 | 3.7056292  | -0.1890893 |
| H  | -2.9573988 | 2.5410502  | -0.1653083 |
| H  | -2.2547008 | 3.6421152  | 1.0407777  |
| H  | -0.6871888 | 1.9291472  | 1.8029477  |
| H  | -2.1204868 | 0.9468202  | 1.5055267  |
| H  | 0.4989472  | 1.7784562  | -1.5757393 |
| H  | -1.1808108 | 1.5009142  | -2.0145163 |
| N  | -0.6950798 | 0.8868352  | -0.0419133 |
| C  | -4.6212378 | -0.8370588 | 0.1898917  |
| C  | -4.3039458 | -0.2309058 | -1.0257683 |
| C  | -2.9970918 | -0.1775628 | -1.4800553 |
| C  | -1.9610938 | -0.6586828 | -0.6592013 |
| C  | -2.2852498 | -1.3610958 | 0.5179207  |
| C  | -3.6000238 | -1.4147808 | 0.9447147  |
| H  | -5.1028308 | 0.1767922  | -1.6455923 |
| H  | -2.7734208 | 0.2375782  | -2.4604163 |
| H  | -1.4992108 | -1.8075368 | 1.1281237  |
| H  | -3.8354158 | -1.9190758 | 1.8796547  |
| C  | -6.0470428 | -0.9067368 | 0.6039267  |
| F  | -6.7822628 | -1.6581018 | -0.2364213 |
| F  | -6.6262748 | 0.3069522  | 0.6077257  |
| F  | -6.2011968 | -1.4247038 | 1.8289827  |
| Br | -0.3706978 | -1.4082428 | -1.7061283 |
| C  | 3.4402772  | -1.5527288 | -0.0188593 |
| C  | 4.4428252  | -2.5095958 | -0.1608903 |
| C  | 4.1273352  | -3.8457558 | 0.0450107  |
| C  | 2.8279852  | -4.1950578 | 0.3913567  |
| C  | 1.8828152  | -3.1838548 | 0.5006237  |
| N  | 2.1851382  | -1.9057198 | 0.2934167  |
| H  | 4.8952902  | -4.6090578 | -0.0604013 |
| H  | 5.4563842  | -2.2225678 | -0.4291723 |
| H  | 2.5465552  | -5.2290098 | 0.5707597  |
| H  | 0.8468052  | -3.3909778 | 0.7693737  |
| C  | 3.6651022  | -0.0973928 | -0.1508143 |
| C  | 4.9227632  | 0.4777902  | -0.3160463 |
| C  | 2.6769282  | 1.9958612  | -0.0185343 |
| C  | 5.0348022  | 1.8610462  | -0.3372993 |
| H  | 5.8099522  | -0.1435678 | -0.4052113 |
| H  | 1.7496022  | 2.5452872  | 0.1443647  |
| H  | 6.0101132  | 2.3265462  | -0.4618083 |

|   |           |           |            |
|---|-----------|-----------|------------|
| C | 3.8964652 | 2.6397602 | -0.1732533 |
| H | 3.9470902 | 3.7247362 | -0.1548563 |
| N | 2.5669692 | 0.6687292 | -0.0365743 |

**c3-L**

|    |            |            |            |
|----|------------|------------|------------|
| Ni | -1.1532331 | -0.0963154 | -0.0978678 |
| Br | -1.1119481 | -0.6712994 | 2.1506472  |
| C  | -0.4773391 | -4.2010984 | -0.6646178 |
| C  | 0.1157789  | -4.7014834 | 0.6489272  |
| C  | 0.9024999  | -3.4987264 | 1.1668432  |
| C  | 0.6471449  | -3.3522764 | -1.2333058 |
| H  | -0.7921281 | -5.0045614 | -1.3400988 |
| H  | -1.3494521 | -3.5553034 | -0.4696938 |
| H  | 0.7937539  | -5.5442884 | 0.4510072  |
| H  | -0.6377221 | -5.0424324 | 1.3676082  |
| H  | 0.3074199  | -2.8947614 | 1.8680722  |
| H  | 1.8355039  | -3.7933924 | 1.6738352  |
| H  | 0.2815549  | -2.5975624 | -1.9400488 |
| H  | 1.4095279  | -3.9740804 | -1.7395518 |
| N  | 1.1881339  | -2.7201184 | -0.0371908 |
| C  | 3.7098739  | 0.6175156  | -0.0270368 |
| C  | 3.2587559  | 0.0744276  | -1.2335258 |
| C  | 2.4352739  | -1.0335934 | -1.2489618 |
| C  | 2.0211919  | -1.6388974 | -0.0407188 |
| C  | 2.4836089  | -1.0815404 | 1.1710722  |
| C  | 3.3098679  | 0.0283186  | 1.1711882  |
| H  | 3.5628219  | 0.5297786  | -2.1755618 |
| H  | 2.0976849  | -1.4366754 | -2.1998798 |
| H  | 2.1654979  | -1.5095004 | 2.1177662  |
| H  | 3.6456689  | 0.4452766  | 2.1183242  |
| C  | 4.5259979  | 1.8562826  | -0.0561188 |
| F  | 3.7900539  | 2.9273586  | -0.4557158 |
| F  | 5.5441469  | 1.7824096  | -0.9235448 |
| F  | 5.0346639  | 2.1736586  | 1.1389362  |
| Br | -0.9663471 | -0.3281414 | -2.4023278 |
| C  | -1.7421401 | 2.6880346  | 0.1046592  |
| C  | -1.5614271 | 4.0619626  | 0.2227552  |
| C  | -0.2679571 | 4.5663866  | 0.2814452  |
| C  | 0.8117639  | 3.6964566  | 0.2161362  |
| C  | 0.5572099  | 2.3352506  | 0.0985532  |
| N  | -0.6841841 | 1.8610496  | 0.0501092  |
| H  | -0.1071971 | 5.6383196  | 0.3745442  |

|   |            |            |            |
|---|------------|------------|------------|
| H | -2.4150801 | 4.7334796  | 0.2685292  |
| H | 1.8383729  | 4.0476166  | 0.2507092  |
| H | 1.3615299  | 1.6001156  | 0.0383752  |
| C | -3.0603911 | 2.0269336  | 0.0260902  |
| C | -4.2820401 | 2.6945626  | 0.0599752  |
| C | -4.1364101 | -0.0253804 | -0.1706468 |
| C | -5.4540511 | 1.9552646  | -0.0260398 |
| H | -4.3223661 | 3.7768136  | 0.1523162  |
| H | -4.0011881 | -1.1036244 | -0.2597438 |
| H | -6.4171641 | 2.4604476  | -0.0008858 |
| C | -5.3886181 | 0.5718276  | -0.1440668 |
| H | -6.2867261 | -0.0353154 | -0.2135078 |
| N | -3.0201951 | 0.6908206  | -0.0877648 |

### TSc3-L

|    |            |            |            |
|----|------------|------------|------------|
| Ni | -0.1478627 | -0.0691473 | -0.1492096 |
| Br | 0.6751383  | -0.3856583 | -2.4118296 |
| C  | -0.9340097 | 4.2661557  | 0.0082394  |
| C  | 0.0748653  | 4.2042577  | -1.1323456 |
| C  | 0.0411573  | 2.7257817  | -1.5045666 |
| C  | -0.6684067 | 2.9449997  | 0.7243694  |
| H  | -0.8213667 | 5.1378477  | 0.6624664  |
| H  | -1.9596277 | 4.2807047  | -0.3927826 |
| H  | 1.0769243  | 4.4745937  | -0.7651406 |
| H  | -0.1599337 | 4.8654107  | -1.9735046 |
| H  | -0.7678327 | 2.4961597  | -2.2249086 |
| H  | 0.9455543  | 2.3113777  | -1.9712576 |
| H  | -1.5123467 | 2.5400087  | 1.3004344  |
| H  | 0.1558763  | 3.0493087  | 1.4554124  |
| N  | -0.2498157 | 1.9948717  | -0.2894336 |
| C  | 4.3964753  | -0.4098273 | 0.4296944  |
| C  | 3.6378763  | -1.5132063 | 0.8196554  |
| C  | 2.2858583  | -1.3742963 | 1.0801654  |
| C  | 1.6678113  | -0.1343323 | 0.8783324  |
| C  | 2.4442293  | 0.9939237  | 0.5995054  |
| C  | 3.7984573  | 0.8429767  | 0.3399534  |
| H  | 4.1198413  | -2.4836253 | 0.9364884  |
| H  | 1.7031063  | -2.2229133 | 1.4294444  |
| H  | 1.9881343  | 1.9771147  | 0.5127894  |
| H  | 4.3944563  | 1.7085917  | 0.0598244  |
| C  | 5.8534963  | -0.6053603 | 0.1756924  |
| F  | 6.0704993  | -1.5463823 | -0.7544676 |

|    |            |            |            |
|----|------------|------------|------------|
| F  | 6.4939173  | -1.0186533 | 1.2823594  |
| F  | 6.4567843  | 0.5144417  | -0.2361206 |
| Br | -0.0356447 | 0.0626967  | 2.2735584  |
| C  | -2.8817177 | -1.3309623 | 0.1571104  |
| C  | -4.1804147 | -1.4584383 | 0.6501824  |
| C  | -5.0053517 | -0.3429423 | 0.6681104  |
| C  | -4.5198217 | 0.8640297  | 0.1809774  |
| C  | -3.2040087 | 0.9069687  | -0.2626296 |
| N  | -2.3986827 | -0.1509943 | -0.2592696 |
| H  | -6.0201017 | -0.4182393 | 1.0536624  |
| H  | -4.5366117 | -2.4132823 | 1.0298774  |
| H  | -5.1393867 | 1.7567907  | 0.1536534  |
| H  | -2.7679847 | 1.8314577  | -0.6445416 |
| C  | -1.9678297 | -2.4814923 | -0.0102106 |
| C  | -2.4442077 | -3.7881703 | -0.1125176 |
| C  | 0.1750593  | -3.1656943 | -0.5003856 |
| C  | -1.5517047 | -4.8093893 | -0.4032236 |
| H  | -3.5060477 | -3.9983893 | -0.0095816 |
| H  | 1.2013903  | -2.8574303 | -0.6936726 |
| H  | -1.9023067 | -5.8356243 | -0.4925766 |
| C  | -0.2170517 | -4.4933903 | -0.6155816 |
| H  | 0.5117563  | -5.2538493 | -0.8832156 |
| N  | -0.6685887 | -2.1887813 | -0.1689866 |

**c4-L**

|    |            |            |            |
|----|------------|------------|------------|
| Ni | 0.2716140  | 0.1041842  | -0.0250946 |
| Br | -0.1500960 | 0.2794442  | -2.3731276 |
| C  | 0.5911550  | -4.3023658 | 0.5258264  |
| C  | 0.0820680  | -4.2517298 | -0.9086136 |
| C  | 0.4327930  | -2.8229678 | -1.3170666 |
| C  | 0.2353960  | -2.9066988 | 1.0261834  |
| H  | 0.1588290  | -5.1005088 | 1.1283124  |
| H  | 1.6885020  | -4.4375668 | 0.5467144  |
| H  | -1.0091330 | -4.3723598 | -0.9138576 |
| H  | 0.5104560  | -5.0153948 | -1.5713696 |
| H  | 1.4759200  | -2.7421288 | -1.6960276 |
| H  | -0.1843330 | -2.3669388 | -2.1050996 |
| H  | 0.8330250  | -2.5106318 | 1.8588274  |
| H  | -0.8115260 | -2.8514008 | 1.3785074  |
| N  | 0.3362450  | -2.0207178 | -0.1123456 |
| C  | -4.4307970 | 0.2336972  | 0.4867624  |
| C  | -3.6369910 | 1.2278752  | 1.0480454  |

|    |            |            |            |
|----|------------|------------|------------|
| C  | -2.2517230 | 1.1570832  | 0.9525674  |
| C  | -1.6573080 | 0.1049282  | 0.2657974  |
| C  | -2.4453330 | -0.9145008 | -0.2536726 |
| C  | -3.8310650 | -0.8473938 | -0.1496976 |
| H  | -4.1047760 | 2.0565092  | 1.5768424  |
| H  | -1.6413380 | 1.9106482  | 1.4403134  |
| H  | -2.0022810 | -1.7522798 | -0.7898526 |
| H  | -4.4421130 | -1.6385528 | -0.5815796 |
| C  | -5.9158510 | 0.3904402  | 0.5055024  |
| F  | -6.3244220 | 1.2761942  | -0.4178006 |
| F  | -6.3578140 | 0.8452522  | 1.6868894  |
| F  | -6.5539490 | -0.7587898 | 0.2534494  |
| Br | 0.5249010  | 0.1499502  | 2.3435814  |
| C  | 2.8997440  | 1.4638512  | -0.0406466 |
| C  | 4.2583210  | 1.6500472  | 0.2103904  |
| C  | 5.0853350  | 0.5464022  | 0.3432164  |
| C  | 4.5343870  | -0.7216998 | 0.2290914  |
| C  | 3.1680060  | -0.8259878 | 0.0081104  |
| N  | 2.3706320  | 0.2314832  | -0.1292356 |
| H  | 6.1432220  | 0.6739682  | 0.5511954  |
| H  | 4.6612750  | 2.6497412  | 0.3303634  |
| H  | 5.1394620  | -1.6190328 | 0.3321284  |
| H  | 2.6783700  | -1.8033648 | -0.0333116 |
| C  | 1.9629000  | 2.5896532  | -0.2218906 |
| C  | 2.3994810  | 3.8908662  | -0.4704886 |
| C  | -0.2358290 | 3.2264332  | -0.4643626 |
| C  | 1.4606650  | 4.8838692  | -0.7050446 |
| H  | 3.4603050  | 4.1230822  | -0.5126936 |
| H  | -1.2748360 | 2.9027892  | -0.4980606 |
| H  | 1.7806880  | 5.9042232  | -0.9042946 |
| C  | 0.1147730  | 4.5468622  | -0.7131346 |
| H  | -0.6561640 | 5.2837832  | -0.9240956 |
| N  | 0.6592060  | 2.2797502  | -0.1961516 |

**c2-O**

|    |            |           |            |
|----|------------|-----------|------------|
| Ni | 1.4395284  | 0.4470132 | -1.0464522 |
| Br | 3.6807834  | 1.2217752 | -0.7550902 |
| C  | -1.3378276 | 2.8204582 | 1.2008278  |
| C  | -0.5931996 | 3.8717642 | 0.3720888  |
| C  | 0.1962604  | 3.0188232 | -0.6077622 |
| C  | -0.4366466 | 1.5703322 | 1.1506458  |
| H  | -1.5369066 | 3.1529792 | 2.2258088  |

|   |            |            |            |
|---|------------|------------|------------|
| H | -2.3075266 | 2.5899052  | 0.7394968  |
| H | 0.1001064  | 4.4481212  | 1.0021458  |
| H | -1.2641896 | 4.5851022  | -0.1196922 |
| H | -0.4503426 | 2.6132532  | -1.3998482 |
| H | 1.0547504  | 3.5090982  | -1.0811132 |
| H | -0.9911946 | 0.7012932  | 0.7714448  |
| H | -0.0109436 | 1.3040092  | 2.1252798  |
| N | 0.6704384  | 1.8789192  | 0.2102068  |
| H | 1.4908814  | 2.1944892  | 0.7321448  |
| C | 2.9347944  | -2.1736338 | 1.7023908  |
| C | 3.4586954  | -2.3756768 | 0.2850438  |
| C | 2.1864654  | -2.3134868 | -0.5414282 |
| C | 1.8893824  | -1.0802118 | 1.5133808  |
| H | 2.4661034  | -3.0981528 | 2.0717178  |
| H | 3.7127604  | -1.8820758 | 2.4167018  |
| H | 4.0018094  | -3.3167478 | 0.1450268  |
| H | 4.1153574  | -1.5411128 | 0.0021708  |
| H | 2.3596174  | -2.0535678 | -1.5941352 |
| H | 1.6447594  | -3.2721318 | -0.5064872 |
| H | 2.3558484  | -0.0891738 | 1.5905118  |
| H | 1.0602324  | -1.1341448 | 2.2297818  |
| N | 1.3740354  | -1.2498888 | 0.1220188  |
| H | 0.3893824  | -1.5170998 | 0.1384448  |
| C | -3.0432536 | -1.7978968 | 0.3757108  |
| C | -2.0031356 | -1.9518278 | -0.5412502 |
| C | -1.7117076 | -0.9536088 | -1.4706482 |
| C | -2.4905896 | 0.2073072  | -1.4687592 |
| C | -3.5386136 | 0.3587972  | -0.5700342 |
| C | -3.8132536 | -0.6412488 | 0.3632908  |
| H | -3.2555486 | -2.5880758 | 1.0945958  |
| H | -1.4176746 | -2.8756168 | -0.5503692 |
| H | -2.2618276 | 0.9880102  | -2.1952482 |
| H | -4.1515516 | 1.2597502  | -0.5961382 |
| H | -4.6315936 | -0.5201798 | 1.0709758  |
| C | -0.5691866 | -1.0811868 | -2.4542632 |
| H | -0.9958946 | -1.1642858 | -3.4737542 |
| H | -0.0645556 | -2.0578238 | -2.2719662 |
| O | 0.2951734  | -0.0123438 | -2.4074142 |

**TSc2-O**

|    |           |           |           |
|----|-----------|-----------|-----------|
| Ni | 0.4170118 | 0.9163209 | 0.1495511 |
| Br | 0.1496548 | 2.6804869 | 1.7976311 |

|   |            |            |            |
|---|------------|------------|------------|
| C | 2.8993368  | -1.9525031 | 2.4251911  |
| C | 1.9066528  | -1.4570371 | 3.4799311  |
| C | 0.8211668  | -0.8236961 | 2.6259121  |
| C | 2.7467868  | -0.9564391 | 1.2580461  |
| H | 3.9285338  | -2.0093171 | 2.7967881  |
| H | 2.6191908  | -2.9596651 | 2.0866661  |
| H | 2.3671408  | -0.6934551 | 4.1244211  |
| H | 1.5348608  | -2.2579771 | 4.1288381  |
| H | 0.2125988  | -1.5952411 | 2.1395891  |
| H | 0.1504798  | -0.1226371 | 3.1334521  |
| H | 2.5563838  | -1.4831371 | 0.3135021  |
| H | 3.6327238  | -0.3216061 | 1.1246561  |
| N | 1.5786308  | -0.0954901 | 1.5821881  |
| H | 1.9147628  | 0.7541879  | 2.0438771  |
| C | 2.5717008  | 3.8355809  | -0.5668879 |
| C | 1.8246918  | 3.6086849  | -1.8957719 |
| C | 2.0332078  | 2.1321189  | -2.2081229 |
| C | 3.0798148  | 2.4542459  | -0.1582059 |
| H | 3.4012358  | 4.5447649  | -0.6626399 |
| H | 1.8837098  | 4.2111729  | 0.1983401  |
| H | 2.1908848  | 4.2419929  | -2.7111079 |
| H | 0.7554438  | 3.8203069  | -1.7697119 |
| H | 1.2060718  | 1.6694839  | -2.7584549 |
| H | 2.9618638  | 1.9817839  | -2.7842129 |
| H | 3.0358718  | 2.2915789  | 0.9244931  |
| H | 4.1171798  | 2.2950749  | -0.4969559 |
| N | 2.1834118  | 1.5090539  | -0.8703549 |
| H | 2.6432298  | 0.6023139  | -0.9751269 |
| C | 1.4615308  | -1.8280381 | -2.5833489 |
| C | 0.3559138  | -1.3867621 | -1.8611519 |
| C | -0.0962302 | -2.0965411 | -0.7429069 |
| C | 0.5768328  | -3.2625281 | -0.3766079 |
| C | 1.6778108  | -3.7106161 | -1.1015549 |
| C | 2.1297038  | -2.9899121 | -2.2036319 |
| H | 1.7907478  | -1.2687981 | -3.4592469 |
| H | -0.1835152 | -0.4894451 | -2.1702669 |
| H | 0.2325928  | -3.8249401 | 0.4935451  |
| H | 2.1904208  | -4.6228491 | -0.7991849 |
| H | 2.9916198  | -3.3376931 | -2.7703079 |
| C | -1.2785982 | -1.5998091 | 0.0510801  |
| H | -1.3390722 | -2.1533701 | 1.0063231  |
| H | -2.2147362 | -1.8494971 | -0.4881529 |

|    |            |            |            |
|----|------------|------------|------------|
| O  | -1.2501962 | -0.2248371 | 0.2650691  |
| C  | -5.3884712 | 0.3364749  | 0.0540091  |
| C  | -4.6080542 | 1.1379729  | 0.9010281  |
| C  | -3.2680122 | 1.3402229  | 0.6583121  |
| C  | -2.6792242 | 0.6924749  | -0.4413489 |
| C  | -3.4459242 | -0.0719631 | -1.3240749 |
| C  | -4.8006132 | -0.2535841 | -1.0542829 |
| H  | -5.0716382 | 1.6115069  | 1.7662781  |
| H  | -2.6451492 | 1.9543659  | 1.3072571  |
| H  | -2.9987632 | -0.4895931 | -2.2247259 |
| H  | -5.4035322 | -0.8480061 | -1.7375909 |
| C  | -6.8315202 | 0.1653669  | 0.3669611  |
| F  | -7.4628572 | -0.6102401 | -0.5245939 |
| F  | -7.4821432 | 1.3411279  | 0.4003091  |
| F  | -7.0192532 | -0.3907521 | 1.5774451  |
| Br | -1.2639032 | 1.9093109  | -1.4601589 |

**c3-O**

|    |            |            |            |
|----|------------|------------|------------|
| Ni | -0.3308707 | -1.1601014 | -0.1740811 |
| Br | 0.4174323  | -3.0325334 | 1.1327379  |
| C  | -2.0461297 | 1.4442026  | 2.9645029  |
| C  | -0.7057997 | 1.0349956  | 3.5825659  |
| C  | 0.0659483  | 0.5134476  | 2.3821829  |
| C  | -2.1949367 | 0.5341596  | 1.7281649  |
| H  | -2.8835647 | 1.3416166  | 3.6636799  |
| H  | -2.0153257 | 2.4955576  | 2.6479099  |
| H  | -0.8440947 | 0.2245916  | 4.3134399  |
| H  | -0.1990467 | 1.8598956  | 4.0956999  |
| H  | 0.4235013  | 1.3287716  | 1.7402929  |
| H  | 0.9165053  | -0.1342154 | 2.6232969  |
| H  | -2.3106737 | 1.1342866  | 0.8162379  |
| H  | -3.0510097 | -0.1485664 | 1.7979029  |
| N  | -0.9449937 | -0.2628704 | 1.6239599  |
| H  | -1.0659627 | -1.1367764 | 2.1448799  |
| C  | -2.6718527 | -3.9390354 | -0.3820221 |
| C  | -2.1704287 | -3.6656144 | -1.8121001 |
| C  | -2.4957837 | -2.2022054 | -2.0525581 |
| C  | -2.9970377 | -2.5567914 | 0.1932389  |
| H  | -3.5616227 | -4.5791164 | -0.3661931 |
| H  | -1.8911697 | -4.4222504 | 0.2147449  |
| H  | -2.6343047 | -4.3136374 | -2.5634701 |
| H  | -1.0833587 | -3.8034584 | -1.8723471 |



|    |            |            |            |
|----|------------|------------|------------|
| H  | -1.8378707 | -1.7214874 | -2.7825491 |
| H  | -3.5492907 | -2.0716704 | -2.3559641 |
| H  | -2.6554207 | -2.4345774 | 1.2272589  |
| H  | -4.0810877 | -2.3585964 | 0.1617409  |
| N  | -2.3038447 | -1.6012074 | -0.7084901 |
| H  | -2.7516047 | -0.6823564 | -0.6744941 |
| C  | -2.6918547 | 1.7837716  | -1.9731511 |
| C  | -1.3251257 | 1.5238876  | -2.0411481 |
| C  | -0.4278417 | 2.2547116  | -1.2582921 |
| C  | -0.9211627 | 3.2418526  | -0.4034271 |
| C  | -2.2859937 | 3.5043396  | -0.3346801 |
| C  | -3.1742937 | 2.7759166  | -1.1223221 |
| H  | -3.3795287 | 1.2243466  | -2.6080201 |
| H  | -0.9319887 | 0.7494596  | -2.7012351 |
| H  | -0.2209167 | 3.8209556  | 0.2012379  |
| H  | -2.6569427 | 4.2865276  | 0.3259919  |
| H  | -4.2410847 | 2.9895196  | -1.0805311 |
| C  | 1.0493893  | 2.0174756  | -1.3646521 |
| H  | 1.5821753  | 2.9770926  | -1.2650881 |
| H  | 1.3068983  | 1.5682096  | -2.3356771 |
| O  | 1.4653063  | 1.1367586  | -0.3260821 |
| C  | 5.4080563  | -0.1376714 | -0.1796841 |
| C  | 4.3998643  | -0.8069744 | 0.5173829  |
| C  | 3.0922303  | -0.3707854 | 0.4445269  |
| C  | 2.7752983  | 0.7469576  | -0.3332831 |
| C  | 3.7719033  | 1.4045586  | -1.0501651 |
| C  | 5.0880553  | 0.9590446  | -0.9642511 |
| H  | 4.6428463  | -1.6896904 | 1.1068999  |
| H  | 2.3007633  | -0.9311934 | 0.9408519  |
| H  | 3.5446833  | 2.2594986  | -1.6804091 |
| H  | 5.8674403  | 1.4741666  | -1.5203441 |
| C  | 6.8104823  | -0.6334074 | -0.0550371 |
| F  | 7.6667033  | 0.0554256  | -0.8185841 |
| F  | 6.9113253  | -1.9236864 | -0.4012371 |
| F  | 7.2490543  | -0.5474904 | 1.2112539  |
| Br | 0.7779583  | -1.3980354 | -2.2410141 |

**TSc3-O**

|    |            |           |            |
|----|------------|-----------|------------|
| Ni | 0.3469963  | 0.1343452 | -0.2221354 |
| Br | 1.4708993  | 0.9291222 | -2.1638394 |
| C  | -3.8132527 | 0.9301282 | -0.5378184 |
| C  | -3.4427597 | 1.5011492 | -1.9035094 |

|   |            |            |            |
|---|------------|------------|------------|
| C | -1.9885717 | 1.0801302  | -2.0309574 |
| C | -2.5381717 | 1.1119362  | 0.2950906  |
| H | -4.6846787 | 1.4116512  | -0.0794884 |
| H | -4.0378367 | -0.1414158 | -0.6348984 |
| H | -3.5276017 | 2.5992992  | -1.9060724 |
| H | -4.0705357 | 1.1163892  | -2.7158304 |
| H | -1.9024467 | 0.0102642  | -2.2547744 |
| H | -1.3928637 | 1.6313862  | -2.7648894 |
| H | -2.3333137 | 0.2396022  | 0.9277656  |
| H | -2.5965167 | 1.9918732  | 0.9519906  |
| N | -1.4198897 | 1.2998802  | -0.6760484 |
| H | -1.1156037 | 2.2716942  | -0.6494504 |
| C | 2.5759703  | 3.6246122  | 0.1526276  |
| C | 2.8765433  | 3.3690422  | 1.6362926  |
| C | 1.6237783  | 2.6505022  | 2.1700326  |
| C | 1.0632293  | 3.5187912  | 0.0777466  |
| H | 2.9505013  | 4.5898772  | -0.2047954 |
| H | 3.0023623  | 2.8364572  | -0.4829404 |
| H | 3.0297453  | 4.3098002  | 2.1793556  |
| H | 3.7924023  | 2.7795422  | 1.7726716  |
| H | 1.8233333  | 1.7102092  | 2.6986806  |
| H | 1.0872973  | 3.3046762  | 2.8773526  |
| H | 0.7195223  | 3.3029182  | -0.9418534 |
| H | 0.5856403  | 4.4486442  | 0.4403516  |
| N | 0.7892013  | 2.3858212  | 0.9774976  |
| H | -0.1856277 | 2.3634312  | 1.2728426  |
| C | -4.3191877 | -2.5879238 | 1.4827766  |
| C | -2.9551457 | -2.5302528 | 1.2120096  |
| C | -2.4903667 | -2.6647278 | -0.0960684 |
| C | -3.4079677 | -2.8425238 | -1.1316894 |
| C | -4.7706587 | -2.9041308 | -0.8635994 |
| C | -5.2279157 | -2.7773298 | 0.4463506  |
| H | -4.6728807 | -2.4874978 | 2.5076476  |
| H | -2.2345207 | -2.3710488 | 2.0151546  |
| H | -3.0420877 | -2.9363598 | -2.1554924 |
| H | -5.4790177 | -3.0553138 | -1.6766234 |
| H | -6.2945917 | -2.8282898 | 0.6583756  |
| C | -1.0167207 | -2.5479468 | -0.3949614 |
| H | -0.7465897 | -3.2490808 | -1.2106154 |
| H | -0.4275417 | -2.8327368 | 0.4941906  |
| O | -0.7396667 | -1.2636598 | -0.8326584 |
| C | 4.6329003  | -1.7536988 | -0.1359464 |

|    |           |            |            |
|----|-----------|------------|------------|
| C  | 4.4368353 | -0.5463488 | 0.5240296  |
| C  | 3.1480013 | -0.0994078 | 0.7858336  |
| C  | 2.0752933 | -0.8507968 | 0.3360976  |
| C  | 2.2440583 | -2.0857998 | -0.2748484 |
| C  | 3.5386963 | -2.5205338 | -0.5273434 |
| H  | 5.2900143 | 0.0497622  | 0.8402196  |
| H  | 2.9925003 | 0.8408732  | 1.2991756  |
| H  | 1.4033513 | -2.6790728 | -0.6150834 |
| H  | 3.6981123 | -3.4651348 | -1.0460384 |
| C  | 6.0043263 | -2.2802128 | -0.4140184 |
| F  | 6.9618913 | -1.4154018 | -0.0659494 |
| F  | 6.1658203 | -2.5619948 | -1.7132304 |
| F  | 6.2326283 | -3.4210898 | 0.2538796  |
| Br | 0.3126773 | -0.6440798 | 2.0374266  |

**c4-O**

|    |            |            |            |
|----|------------|------------|------------|
| Ni | 0.3309146  | 0.3768031  | -0.1558475 |
| Br | 0.7947876  | 0.9647381  | -2.3868515 |
| C  | -4.0802994 | 1.1240531  | 0.1026415  |
| C  | -3.8710054 | 0.9186441  | -1.4034545 |
| C  | -2.4908794 | 0.2869671  | -1.4700265 |
| C  | -2.6566154 | 1.1456241  | 0.6951565  |
| H  | -4.6415324 | 2.0389021  | 0.3258715  |
| H  | -4.6449474 | 0.2847911  | 0.5302095  |
| H  | -3.8694694 | 1.8822561  | -1.9348065 |
| H  | -4.6458874 | 0.2928791  | -1.8617065 |
| H  | -2.5337174 | -0.7672219 | -1.1718355 |
| H  | -1.9751204 | 0.3537611  | -2.4325935 |
| H  | -2.4777904 | 0.3009361  | 1.3700125  |
| H  | -2.4344494 | 2.0573831  | 1.2648595  |
| N  | -1.7086854 | 1.0157911  | -0.4418935 |
| H  | -1.5513304 | 1.9471091  | -0.8364955 |
| C  | 2.2671266  | 3.7845741  | -0.3646905 |
| C  | 2.6511526  | 3.6643731  | 1.1164405  |
| C  | 1.4592646  | 2.9428511  | 1.7695805  |
| C  | 0.7571936  | 3.6424471  | -0.3417705 |
| H  | 2.5986096  | 4.7219381  | -0.8242425 |
| H  | 2.6828526  | 2.9522621  | -0.9490595 |
| H  | 2.7852416  | 4.6536651  | 1.5715265  |
| H  | 3.5970066  | 3.1256091  | 1.2494685  |
| H  | 1.7090106  | 2.0531571  | 2.3579605  |
| H  | 0.9239186  | 3.6298461  | 2.4444315  |

|    |            |            |            |
|----|------------|------------|------------|
| H  | 0.3397126  | 3.3625491  | -1.3146225 |
| H  | 0.2817626  | 4.5762571  | 0.0106705  |
| N  | 0.5689636  | 2.5599431  | 0.6447815  |
| H  | -0.3853704 | 2.5501151  | 1.0006765  |
| C  | -3.9679074 | -2.5482239 | 1.3094205  |
| C  | -2.5819484 | -2.4750999 | 1.2193365  |
| C  | -1.9375514 | -2.9545989 | 0.0785535  |
| C  | -2.6846534 | -3.4691089 | -0.9837125 |
| C  | -4.0685794 | -3.5317269 | -0.8943455 |
| C  | -4.7112554 | -3.0683009 | 0.2526915  |
| H  | -4.4696054 | -2.1893869 | 2.2069235  |
| H  | -1.9852864 | -2.0298959 | 2.0150535  |
| H  | -2.1698704 | -3.8111109 | -1.8816265 |
| H  | -4.6492834 | -3.9409269 | -1.7188475 |
| H  | -5.7967664 | -3.1145809 | 0.3224445  |
| C  | -0.4333274 | -2.8106399 | -0.0718635 |
| H  | -0.0268864 | -3.6705169 | -0.6295765 |
| H  | 0.0636136  | -2.6986899 | 0.9022045  |
| O  | -0.3361704 | -1.6657959 | -0.8474505 |
| C  | 4.6951806  | -1.4792249 | -0.1071035 |
| C  | 4.4227666  | -0.3473929 | 0.6488295  |
| C  | 3.1524016  | 0.2236381  | 0.6167205  |
| C  | 2.1597016  | -0.3389879 | -0.1667335 |
| C  | 2.4342956  | -1.4603859 | -0.9462945 |
| C  | 3.6981926  | -2.0349479 | -0.9044925 |
| H  | 5.1968936  | 0.0877971  | 1.2772375  |
| H  | 2.9499896  | 1.0849111  | 1.2415605  |
| H  | 1.6882526  | -1.8675689 | -1.6262895 |
| H  | 3.9197676  | -2.9102879 | -1.5146405 |
| C  | 6.0453336  | -2.1178679 | -0.1107005 |
| F  | 6.8956366  | -1.5249139 | 0.7339605  |
| F  | 6.6027896  | -2.0812909 | -1.3303575 |
| F  | 5.9764016  | -3.4131349 | 0.2330225  |
| Br | 0.1374556  | -0.2847449 | 2.1116845  |

**c2-S**

|    |            |            |            |
|----|------------|------------|------------|
| Ni | -2.1724749 | 0.2343883  | -0.7905704 |
| Br | -3.9765969 | 1.6516563  | -0.1663804 |
| C  | -1.6180629 | -3.3175657 | 0.6803276  |
| C  | -3.1346159 | -3.3975657 | 0.8187806  |
| C  | -3.5738959 | -2.0274517 | 0.3248466  |
| C  | -1.3133969 | -1.9106027 | 1.1733176  |

|   |            |            |            |
|---|------------|------------|------------|
| H | -1.0809909 | -4.0854947 | 1.2485506  |
| H | -1.3326659 | -3.4014817 | -0.3785494 |
| H | -3.4160179 | -3.5342727 | 1.8738626  |
| H | -3.5837409 | -4.2134677 | 0.2419996  |
| H | -3.6527579 | -2.0160857 | -0.7726874 |
| H | -4.5293059 | -1.6720087 | 0.7239536  |
| H | -0.3874009 | -1.4994547 | 0.7513846  |
| H | -1.2393369 | -1.8843357 | 2.2711536  |
| N | -2.4789049 | -1.0944297 | 0.7360956  |
| H | -2.8126009 | -0.4998277 | 1.4928696  |
| C | -0.0921109 | 3.1104993  | 1.3900126  |
| C | -0.8112929 | 3.7261833  | 0.1947606  |
| C | -0.6162179 | 2.6725573  | -0.8854564 |
| C | -0.5466459 | 1.6621873  | 1.3017596  |
| H | 0.9991121  | 3.1733063  | 1.2553596  |
| H | -0.3482669 | 3.5777673  | 2.3476126  |
| H | -0.4197139 | 4.7051263  | -0.1027444 |
| H | -1.8842919 | 3.8285703  | 0.4097896  |
| H | -1.4135559 | 2.6775523  | -1.6401844 |
| H | 0.3489821  | 2.7969373  | -1.3969494 |
| H | -1.5582399 | 1.5596013  | 1.7179026  |
| H | 0.1176561  | 0.9436153  | 1.7982556  |
| N | -0.6019409 | 1.3646403  | -0.1547634 |
| H | 0.2382221  | 0.8524863  | -0.4271184 |
| C | 3.3995111  | 0.2108793  | -0.1839704 |
| C | 2.6616321  | -0.9750347 | -0.1755804 |
| C | 1.6598451  | -1.1716757 | -1.1237454 |
| C | 1.3608581  | -0.2095587 | -2.0887994 |
| C | 2.1385531  | 0.9555773  | -2.0994914 |
| C | 3.1345891  | 1.1748943  | -1.1595294 |
| H | 2.8570961  | -1.7514087 | 0.5606146  |
| H | 1.0683991  | -2.0876477 | -1.1015244 |
| H | 1.9444771  | 1.7164903  | -2.8576234 |
| H | 3.7286061  | 2.0868813  | -1.1604094 |
| O | 4.3807371  | 0.5163633  | 0.7010246  |
| C | 4.6998581  | -0.4384947 | 1.6816616  |
| H | 5.0438181  | -1.3823927 | 1.2325676  |
| H | 5.5096361  | -0.0102797 | 2.2777316  |
| H | 3.8420381  | -0.6481887 | 2.3392486  |
| C | 0.2310661  | -0.3790887 | -3.0700224 |
| H | 0.5370981  | -1.0375097 | -3.8952594 |
| H | -0.0065609 | 0.5937753  | -3.5226244 |

|   |            |            |            |
|---|------------|------------|------------|
| S | -1.3001869 | -1.1466117 | -2.3914614 |
|---|------------|------------|------------|

**TSc2-S**

|    |            |            |            |
|----|------------|------------|------------|
| Ni | 0.2084731  | -0.8455915 | 0.1194938  |
| Br | 1.1738181  | -2.6968875 | 1.3621338  |
| C  | -3.3240839 | 0.1588325  | 2.6507418  |
| C  | -2.2069829 | 0.0860395  | 3.6913088  |
| C  | -0.9619609 | 0.1682405  | 2.8245638  |
| C  | -2.7261289 | -0.5268945 | 1.4085188  |
| H  | -4.2576059 | -0.3101235 | 2.9817458  |
| H  | -3.5483069 | 1.2102705  | 2.4181498  |
| H  | -2.2287879 | -0.8779235 | 4.2213448  |
| H  | -2.2645769 | 0.8811645  | 4.4432798  |
| H  | -0.8043699 | 1.1911385  | 2.4542648  |
| H  | -0.0321369 | -0.1668255 | 3.2959948  |
| H  | -2.8652059 | 0.0978815  | 0.5156228  |
| H  | -3.1766609 | -1.5077095 | 1.2102218  |
| N  | -1.2712789 | -0.7037375 | 1.6682728  |
| H  | -1.1107149 | -1.6610335 | 1.9950408  |
| C  | -0.7547919 | -4.1928845 | -1.2430812 |
| C  | -0.1781529 | -3.4673075 | -2.4728942 |
| C  | -0.9319449 | -2.1453905 | -2.5242792 |
| C  | -1.7010399 | -3.1826885 | -0.5951662 |
| H  | -1.2882089 | -5.1132695 | -1.5059422 |
| H  | 0.0454341  | -4.4477305 | -0.5398732 |
| H  | -0.2986089 | -4.0309665 | -3.4044722 |
| H  | 0.8936021  | -3.2790005 | -2.3347222 |
| H  | -0.3581949 | -1.3229495 | -2.9671462 |
| H  | -1.8738889 | -2.2531425 | -3.0892712 |
| H  | -1.6599309 | -3.2146405 | 0.4991828  |
| H  | -2.7432209 | -3.3535915 | -0.9138662 |
| N  | -1.2439219 | -1.8642665 | -1.1027142 |
| H  | -2.0089009 | -1.1876845 | -1.0597892 |
| C  | 6.1516221  | 0.5650895  | -0.0061362 |
| C  | 5.4990501  | -0.5241135 | 0.5845218  |
| C  | 4.1462621  | -0.7278735 | 0.4100498  |
| C  | 3.4182521  | 0.2017235  | -0.3482262 |
| C  | 4.0630641  | 1.2495725  | -1.0072002 |
| C  | 5.4258171  | 1.4386475  | -0.8042002 |
| H  | 6.0685821  | -1.2238605 | 1.1959968  |
| H  | 3.6301101  | -1.5660615 | 0.8764898  |
| H  | 3.5191301  | 1.9027085  | -1.6867252 |

|    |            |            |            |
|----|------------|------------|------------|
| H  | 5.9278791  | 2.2665235  | -1.3004792 |
| C  | 7.6137411  | 0.7260705  | 0.2135578  |
| F  | 7.9137551  | 0.8407195  | 1.5187288  |
| F  | 8.1092671  | 1.8073025  | -0.4027202 |
| F  | 8.3075821  | -0.3360225 | -0.2305492 |
| Br | 1.9925501  | -0.7812555 | -1.7063402 |
| C  | -3.0732549 | 2.0822995  | -1.1598582 |
| C  | -2.7107319 | 2.7837965  | -0.0086512 |
| C  | -1.3684829 | 2.8537505  | 0.3595598  |
| C  | -0.3660839 | 2.2467335  | -0.3945092 |
| C  | -0.7478239 | 1.5710235  | -1.5630132 |
| C  | -2.0792799 | 1.4815925  | -1.9398432 |
| H  | -3.4587769 | 3.2815285  | 0.6041458  |
| H  | -1.0944159 | 3.4080915  | 1.2588938  |
| H  | 0.0249401  | 1.1201215  | -2.1862112 |
| H  | -2.3761919 | 0.9703445  | -2.8552762 |
| O  | -4.3462599 | 1.9227305  | -1.5965962 |
| C  | -5.3810309 | 2.4510845  | -0.8036402 |
| H  | -5.3109059 | 3.5456415  | -0.7191302 |
| H  | -6.3170819 | 2.1910605  | -1.3037092 |
| H  | -5.3769869 | 2.0124475  | 0.2072368  |
| C  | 1.0707631  | 2.3200275  | 0.0209898  |
| H  | 1.2433971  | 3.1971555  | 0.6565628  |
| H  | 1.7246391  | 2.4285235  | -0.8571722 |
| S  | 1.6551831  | 0.8515515  | 0.9667898  |

**c3-S**

|    |            |            |            |
|----|------------|------------|------------|
| Ni | -0.2700860 | 1.0252808  | -0.0217290 |
| Br | -1.2856230 | 2.5907738  | 1.5240210  |
| C  | 3.2232020  | -0.2981592 | 2.4931370  |
| C  | 2.0802610  | -0.3706772 | 3.5041820  |
| C  | 0.8650010  | -0.4032272 | 2.5938580  |
| C  | 2.6317200  | 0.5010538  | 1.3172920  |
| H  | 4.1342780  | 0.1577008  | 2.8965460  |
| H  | 3.4828310  | -1.3121912 | 2.1542560  |
| H  | 2.0519080  | 0.5335188  | 4.1305890  |
| H  | 2.1462770  | -1.2376992 | 4.1712140  |
| H  | 0.7743840  | -1.3863232 | 2.1097070  |
| H  | -0.0904740 | -0.1647252 | 3.0736470  |
| H  | 2.8078970  | -0.0172222 | 0.3652250  |
| H  | 3.0572830  | 1.5098448  | 1.2412250  |
| N  | 1.1654270  | 0.6091818  | 1.5557320  |

|    |            |            |            |
|----|------------|------------|------------|
| H  | 0.9766740  | 1.5121778  | 2.0019690  |
| C  | 0.6506070  | 4.5275908  | -0.8011320 |
| C  | 0.2528820  | 3.9652488  | -2.1793890 |
| C  | 1.0738480  | 2.6929478  | -2.3291060 |
| C  | 1.6002940  | 3.4866108  | -0.2114130 |
| H  | 1.1378530  | 5.5073018  | -0.8639900 |
| H  | -0.2295870 | 4.6246118  | -0.1560310 |
| H  | 0.4446500  | 4.6636918  | -3.0015090 |
| H  | -0.8118710 | 3.7041808  | -2.1946760 |
| H  | 0.5712600  | 1.9226058  | -2.9215970 |
| H  | 2.0640060  | 2.9075368  | -2.7674010 |
| H  | 1.4738700  | 3.3669128  | 0.8705970  |
| H  | 2.6525840  | 3.7475108  | -0.4177020 |
| N  | 1.2591060  | 2.2333358  | -0.9298690 |
| H  | 2.0478630  | 1.5855318  | -0.8974110 |
| C  | -6.0967150 | -0.7264322 | 0.0771500  |
| C  | -5.3290800 | 0.3287128  | 0.5664360  |
| C  | -3.9618430 | 0.1818678  | 0.7331200  |
| C  | -3.3621490 | -1.0390632 | 0.4182640  |
| C  | -4.1290100 | -2.0993112 | -0.0597260 |
| C  | -5.4978800 | -1.9388302 | -0.2388680 |
| H  | -5.8048480 | 1.2793228  | 0.8024310  |
| H  | -3.3546620 | 1.0132708  | 1.0904630  |
| H  | -3.6703360 | -3.0588492 | -0.2904540 |
| H  | -6.0995750 | -2.7616932 | -0.6166000 |
| C  | -7.5663940 | -0.5121332 | -0.0989210 |
| F  | -8.1467840 | -0.1500692 | 1.0542330  |
| F  | -8.1940470 | -1.6099162 | -0.5348940 |
| F  | -7.8168980 | 0.4686248  | -0.9756840 |
| Br | -1.7594180 | 1.0428168  | -1.9049390 |
| C  | 3.1778530  | -2.0368422 | -1.2048830 |
| C  | 2.6033940  | -2.9057682 | -0.2749190 |
| C  | 1.2163390  | -2.9568782 | -0.1522150 |
| C  | 0.3831760  | -2.1595302 | -0.9341290 |
| C  | 0.9762960  | -1.2942232 | -1.8648370 |
| C  | 2.3537870  | -1.2346122 | -2.0023470 |
| H  | 3.2199980  | -3.5498132 | 0.3475840  |
| H  | 0.7715950  | -3.6442852 | 0.5699840  |
| H  | 0.3329750  | -0.6674612 | -2.4839610 |
| H  | 2.8212690  | -0.5791572 | -2.7365420 |
| O  | 4.5097190  | -1.8879212 | -1.3981920 |
| C  | 5.3810750  | -2.6613432 | -0.6094150 |



|   |            |            |            |
|---|------------|------------|------------|
| H | 5.2241980  | -3.7383842 | -0.7686300 |
| H | 6.3946010  | -2.3975162 | -0.9207390 |
| H | 5.2634150  | -2.4360192 | 0.4621940  |
| C | -1.1049730 | -2.2158092 | -0.7806710 |
| H | -1.4477150 | -3.2483722 | -0.6415200 |
| H | -1.6175540 | -1.7616182 | -1.6379000 |
| S | -1.6081320 | -1.2276892 | 0.6988820  |

### TSc3-S

|    |            |            |            |
|----|------------|------------|------------|
| Ni | -0.8538008 | 0.4104193  | -0.7117634 |
| Br | -1.1688648 | 2.7626453  | -1.6420254 |
| C  | -1.4539888 | 1.2023023  | 3.5344336  |
| C  | -2.8352798 | 1.6007253  | 3.0279326  |
| C  | -2.8067348 | 1.0366663  | 1.6185586  |
| C  | -0.5552378 | 1.4176103  | 2.3144706  |
| H  | -1.1173828 | 1.7721543  | 4.4079566  |
| H  | -1.4558538 | 0.1378183  | 3.8121756  |
| H  | -2.9351428 | 2.6961673  | 2.9957776  |
| H  | -3.6565968 | 1.2023123  | 3.6344416  |
| H  | -2.9483118 | -0.0543057 | 1.6396526  |
| H  | -3.5480168 | 1.4587163  | 0.9308656  |
| H  | 0.2396742  | 0.6639703  | 2.2548396  |
| H  | -0.0762998 | 2.4056243  | 2.3289386  |
| N  | -1.4438788 | 1.3362873  | 1.1176926  |
| H  | -1.4763918 | 2.2591833  | 0.6722606  |
| C  | 3.1969002  | 2.1701303  | -0.5111804 |
| C  | 2.7473362  | 2.3625823  | -1.9544444 |
| C  | 1.7579632  | 1.2196903  | -2.1835984 |
| C  | 1.8956782  | 1.7385893  | 0.1443066  |
| H  | 3.9422822  | 1.3596933  | -0.4426964 |
| H  | 3.6294992  | 3.0712693  | -0.0597694 |
| H  | 3.5712452  | 2.3535303  | -2.6771604 |
| H  | 2.2212122  | 3.3227563  | -2.0522164 |
| H  | 0.9155482  | 1.5238743  | -2.8098874 |
| H  | 2.2400012  | 0.3486723  | -2.6464134 |
| H  | 1.2325342  | 2.6058753  | 0.2765346  |
| H  | 2.0186832  | 1.2317403  | 1.1099186  |
| N  | 1.2610532  | 0.8165433  | -0.8239664 |
| H  | 1.6427962  | -0.1119577 | -0.6415674 |
| C  | -5.3933848 | -0.8722967 | -0.7915024 |
| C  | -4.4533908 | -1.8052047 | -0.3792744 |
| C  | -3.1016148 | -1.5724477 | -0.6271284 |

|    |            |            |            |
|----|------------|------------|------------|
| C  | -2.6948288 | -0.3623467 | -1.1888384 |
| C  | -3.6447758 | 0.5277223  | -1.7040724 |
| C  | -4.9870158 | 0.2816523  | -1.4713214 |
| H  | -4.7711518 | -2.7303877 | 0.0958186  |
| H  | -2.3791418 | -2.3529137 | -0.3898924 |
| H  | -3.3208578 | 1.4332523  | -2.2113844 |
| H  | -5.7370708 | 0.9916003  | -1.8191774 |
| C  | -6.8557838 | -1.0794297 | -0.5632244 |
| F  | -7.5393298 | -1.0632677 | -1.7150414 |
| F  | -7.3695288 | -0.1012317 | 0.1980386  |
| F  | -7.1199058 | -2.2398977 | 0.0456256  |
| Br | -0.8700118 | -0.8719027 | -2.7217704 |
| C  | 4.5514312  | -1.4870217 | -0.4938774 |
| C  | 4.0296332  | -1.6729057 | 0.7883666  |
| C  | 2.7364272  | -2.1642727 | 0.9356576  |
| C  | 1.9407792  | -2.4703977 | -0.1717534 |
| C  | 2.4828002  | -2.2828287 | -1.4495424 |
| C  | 3.7719762  | -1.8068667 | -1.6120284 |
| H  | 4.6178542  | -1.4411597 | 1.6724726  |
| H  | 2.3307022  | -2.3052707 | 1.9384256  |
| H  | 1.8674262  | -2.4882697 | -2.3259774 |
| H  | 4.2018952  | -1.6565537 | -2.6004754 |
| O  | 5.7831692  | -0.9981717 | -0.7579334 |
| C  | 6.6041012  | -0.6486227 | 0.3317016  |
| H  | 6.8185192  | -1.5182797 | 0.9701586  |
| H  | 7.5387442  | -0.2777807 | -0.0951974 |
| H  | 6.1466862  | 0.1441683  | 0.9426176  |
| C  | 0.5202642  | -2.9223797 | 0.0059676  |
| H  | 0.4451132  | -3.8369847 | 0.6064396  |
| H  | 0.0467642  | -3.0902667 | -0.9712524 |
| S  | -0.3771188 | -1.5803227 | 0.8653096  |

**c4-S**

|    |            |           |            |
|----|------------|-----------|------------|
| Ni | -0.8932894 | 0.3435857 | -0.7225919 |
| Br | -1.2019144 | 2.6372817 | -1.7918559 |
| C  | -1.2415154 | 1.6535097 | 3.4662631  |
| C  | -2.6745394 | 1.9133857 | 3.0197551  |
| C  | -2.7275694 | 1.1264477 | 1.7234041  |
| C  | -0.4517034 | 1.6824487 | 2.1544281  |
| H  | -0.8631844 | 2.3769857 | 4.1972601  |
| H  | -1.1724254 | 0.6547547 | 3.9221531  |
| H  | -2.8306274 | 2.9838167 | 2.8180861  |

|    |            |            |            |
|----|------------|------------|------------|
| H  | -3.4272374 | 1.5917257  | 3.7484621  |
| H  | -2.7967904 | 0.0481157  | 1.9306381  |
| H  | -3.5507354 | 1.3898287  | 1.0508491  |
| H  | 0.3502446  | 0.9349867  | 2.1473221  |
| H  | 0.0077876  | 2.6627517  | 1.9744351  |
| N  | -1.4303404 | 1.4085587  | 1.0598211  |
| H  | -1.5464144 | 2.2696587  | 0.5131891  |
| C  | 3.1938726  | 2.0847057  | -0.7688239 |
| C  | 2.6624706  | 2.2446767  | -2.1873579 |
| C  | 1.6782646  | 1.0872647  | -2.3348319 |
| C  | 1.9278936  | 1.6805977  | -0.0323219 |
| H  | 3.9390856  | 1.2720827  | -0.7228999 |
| H  | 3.6550446  | 2.9932577  | -0.3627949 |
| H  | 3.4429456  | 2.2277477  | -2.9566079 |
| H  | 2.1206866  | 3.1972707  | -2.2742679 |
| H  | 0.8151496  | 1.3466777  | -2.9510809 |
| H  | 2.1589766  | 0.2015807  | -2.7696119 |
| H  | 1.2838216  | 2.5589567  | 0.1144211  |
| H  | 2.1004486  | 1.1959497  | 0.9373951  |
| N  | 1.2260976  | 0.7423107  | -0.9394969 |
| H  | 1.6024766  | -0.1865553 | -0.7453239 |
| C  | -5.4693594 | -0.9443883 | -0.7307089 |
| C  | -4.5256894 | -1.7723773 | -0.1372429 |
| C  | -3.1713544 | -1.4702813 | -0.2527649 |
| C  | -2.7674464 | -0.3117153 | -0.9073079 |
| C  | -3.7042194 | 0.4782487  | -1.5698409 |
| C  | -5.0542434 | 0.1695617  | -1.4583569 |
| H  | -4.8415474 | -2.6642323 | 0.3996151  |
| H  | -2.4456454 | -2.1577133 | 0.1822451  |
| H  | -3.3851494 | 1.3484037  | -2.1373019 |
| H  | -5.7948634 | 0.8002867  | -1.9494659 |
| C  | -6.9335314 | -1.2118063 | -0.6038799 |
| F  | -7.5431094 | -1.2061423 | -1.7967809 |
| F  | -7.5390434 | -0.2685193 | 0.1355871  |
| F  | -7.1907644 | -2.3912203 | -0.0268419 |
| Br | -0.7879954 | -1.1161693 | -2.5745669 |
| C  | 4.5109616  | -1.5761933 | -0.4706879 |
| C  | 4.0747526  | -1.7679633 | 0.8426481  |
| C  | 2.7944396  | -2.2589743 | 1.0699201  |
| C  | 1.9270306  | -2.5589583 | 0.0113131  |
| C  | 2.3854246  | -2.3668523 | -1.3019029 |
| C  | 3.6622396  | -1.8968333 | -1.5407109 |

|   |            |            |            |
|---|------------|------------|------------|
| H | 4.7192296  | -1.5416293 | 1.6877841  |
| H | 2.4546306  | -2.4099483 | 2.0948881  |
| H | 1.7072996  | -2.5526813 | -2.1342539 |
| H | 4.0318766  | -1.7466113 | -2.5533039 |
| O | 5.7169006  | -1.0811443 | -0.8131069 |
| C | 6.5888136  | -0.6793023 | 0.2196341  |
| H | 6.8689656  | -1.5263173 | 0.8622571  |
| H | 7.4834006  | -0.2888303 | -0.2702599 |
| H | 6.1375796  | 0.1122047  | 0.8362951  |
| C | 0.5109836  | -2.9747793 | 0.2828091  |
| H | 0.4346376  | -3.8279423 | 0.9659561  |
| H | -0.0295304 | -3.1806413 | -0.6500739 |
| S | -0.1826514 | -1.4829013 | 1.0703911  |
